# Supplementary material for: Aberrant R-loop–mediated immune evasion, cellular communication, and metabolic reprogramming affect cancer progression: a single-cell analysis
Source: PubMed Central journal article supplement (PMC10777569; doi:10.1186/s12943-023-01924-6), 2024-01-10

**A**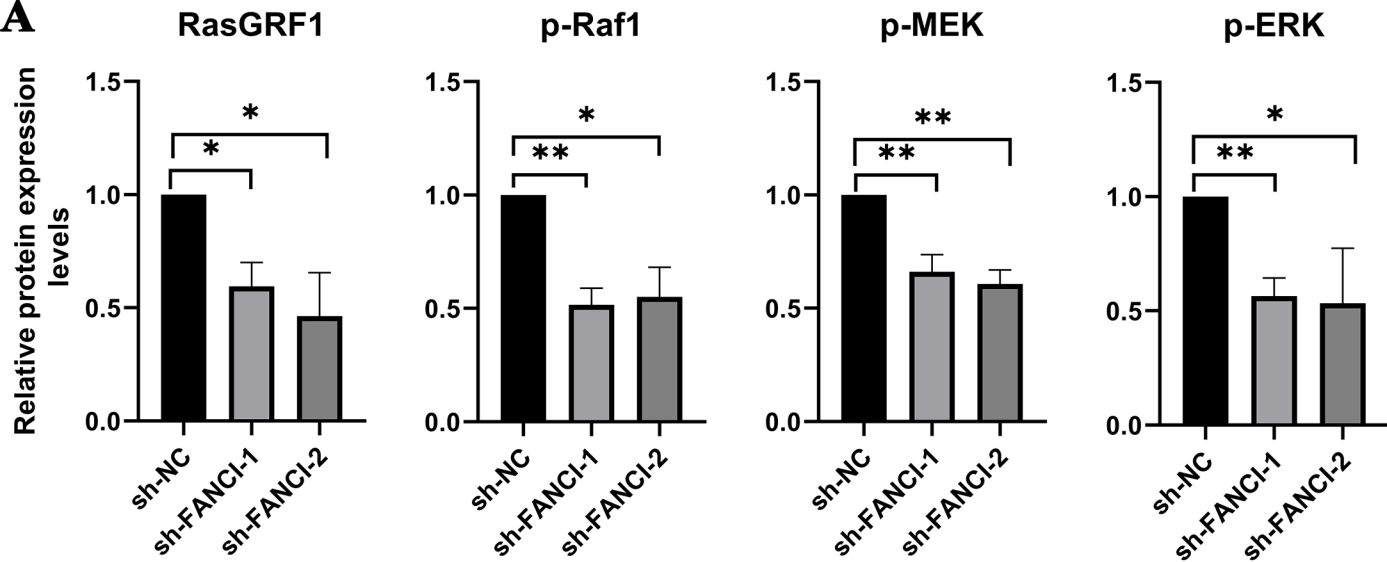**B**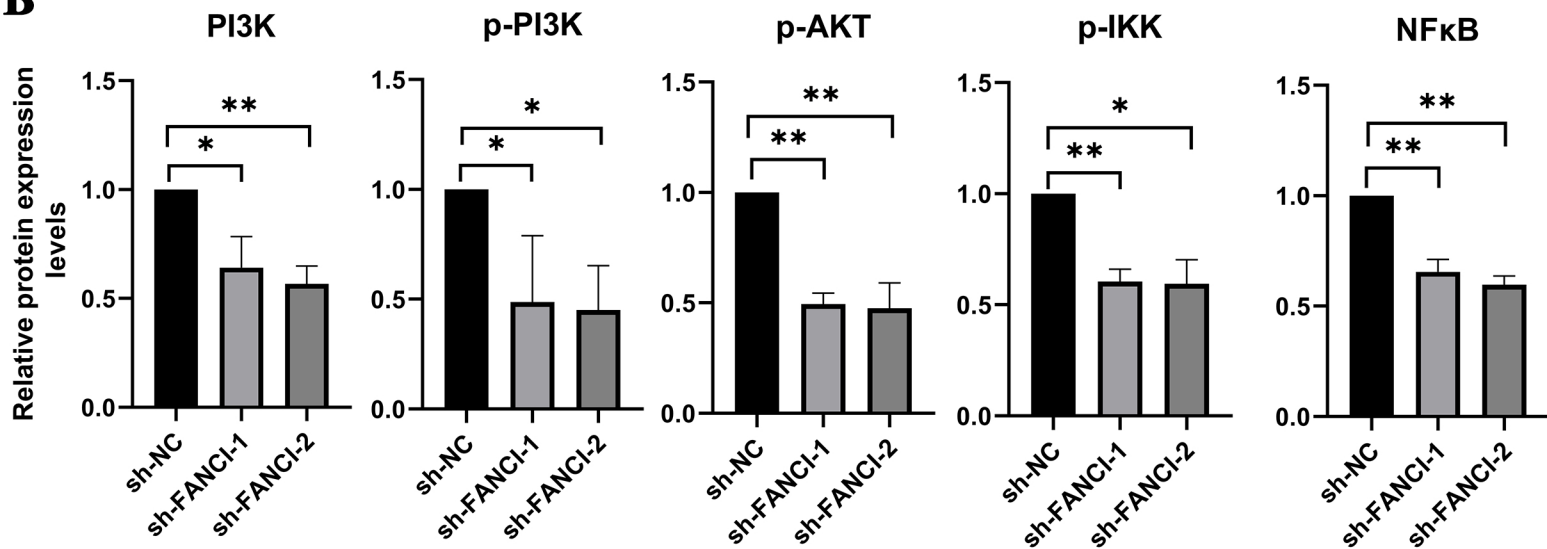

Supplement: 12943_2023_1924_MOESM10_ESM.pdf [file 12943_2023_1924_MOESM10_ESM.pdf]
