# Supplementary material for: Aberrant R-loop–mediated immune evasion, cellular communication, and metabolic reprogramming affect cancer progression: a single-cell analysis
Source: Springer Nature journal article supplement (doi:10.1186/s12943-023-01924-6), 2024-01-10
Supplement: MOESM2 [file 12943_2023_1924_MOESM2_ESM.pdf]

(((lung cancer[Title] OR (lung adenocarcinoma[Title])) OR (NSCLC[Title/Abstract])) OR (lung tumor[Title/Abstract]) ) OR (neoadjuvant immunotherapy[Title])) AND (((single-cell transcript\*[Title/Abstract]) OR (single-cell RNA[Title/Abstract])) OR (scRNA-seq[Title/Abstract]))

Remove articles  
before 2018  
(n = 4)

Remove no public  
data available in  
GEO (n = 15)

- 27 — GSE123904 (1)
- PRJNA591860 (1)
- GSE146100 (1)
- GSE131907 (24)

Remove without well-informed clinical data, and  
cells no more than 20000, and patients no more  
than 15, and mouse single-cell RNA (n = 102)

Remove unable to  
obtain full-text and  
review (n = 33)

All (n = 181)
