# Supplementary material for: Aberrant R-loop–mediated immune evasion, cellular communication, and metabolic reprogramming affect cancer progression: a single-cell analysis
Source: Springer Nature journal article supplement (doi:10.1186/s12943-023-01924-6), 2024-01-10

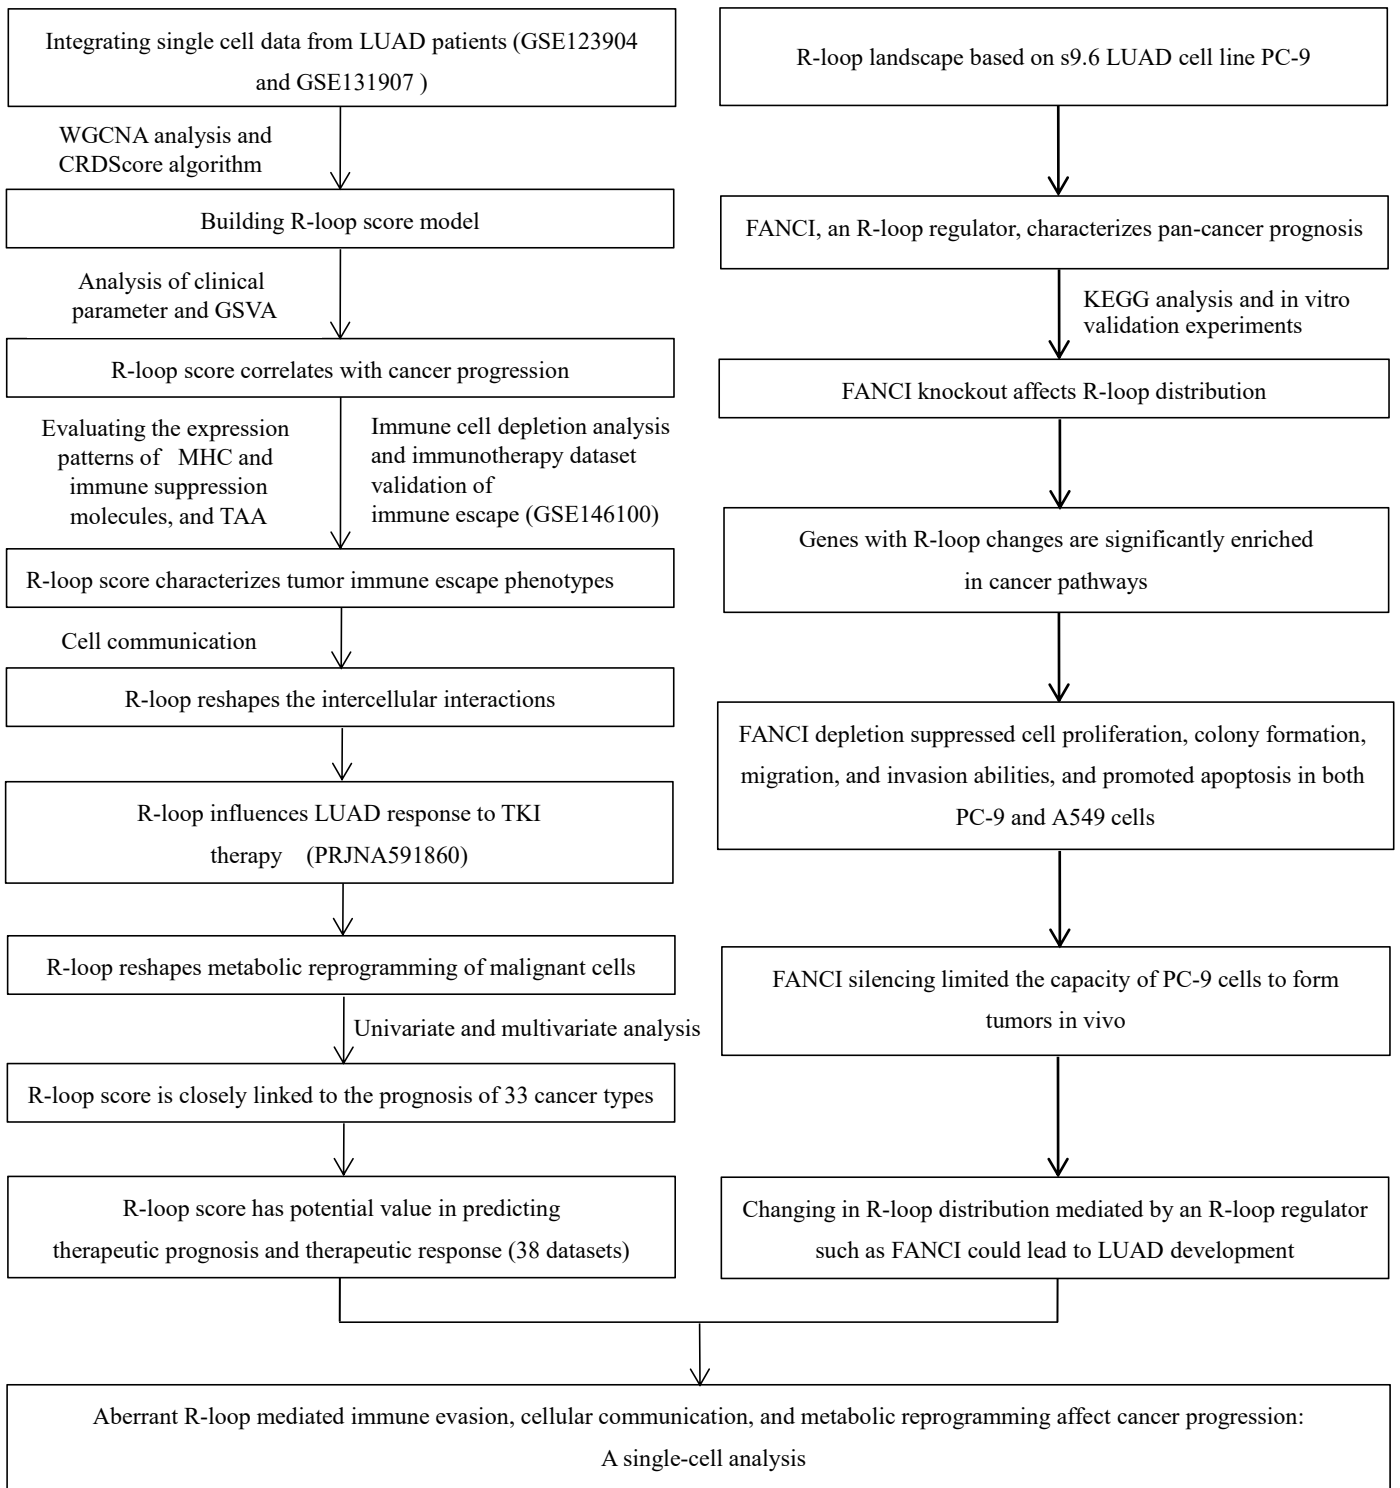

Supplement: MOESM3 [file 12943_2023_1924_MOESM3_ESM.pdf]
