# Supplementary material for: Aberrant R-loop–mediated immune evasion, cellular communication, and metabolic reprogramming affect cancer progression: a single-cell analysis
Source: Springer Nature journal article supplement (doi:10.1186/s12943-023-01924-6), 2024-01-10

**A**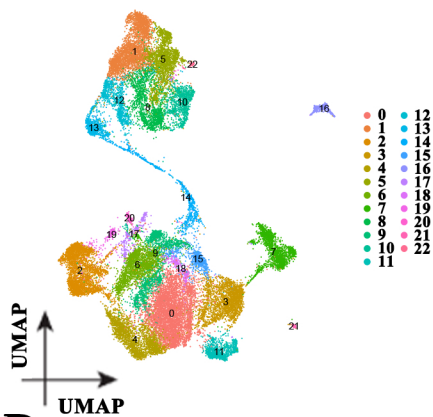**B**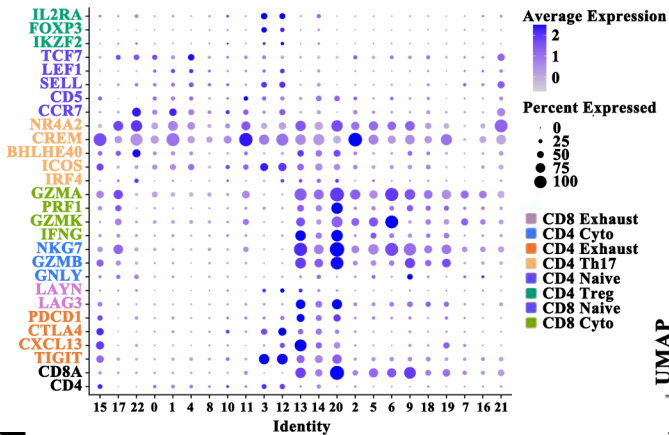**C**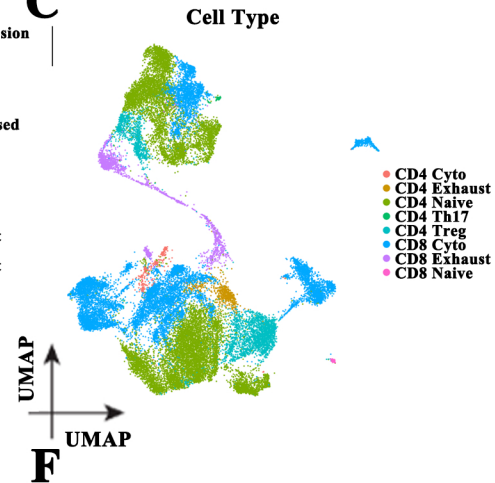**D**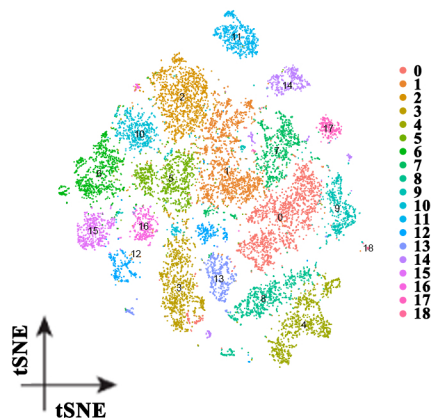**E**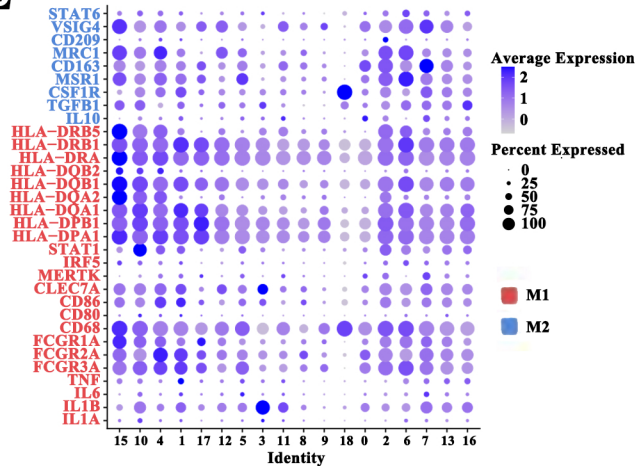**F**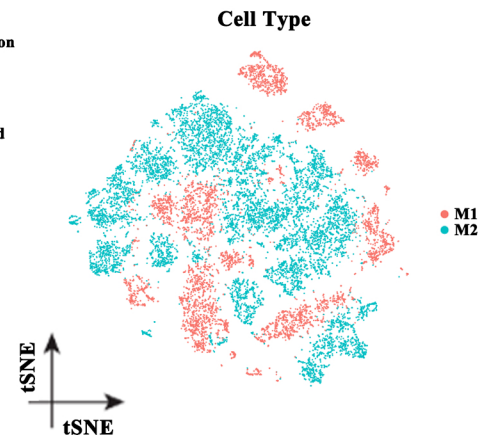

Supplement: MOESM6 [file 12943_2023_1924_MOESM6_ESM.pdf]
