# Supplementary material for: Aberrant R-loop–mediated immune evasion, cellular communication, and metabolic reprogramming affect cancer progression: a single-cell analysis
Source: Springer Nature journal article supplement (doi:10.1186/s12943-023-01924-6), 2024-01-10
Supplement: MOESM8 [file 12943_2023_1924_MOESM8_ESM.pdf]

**A**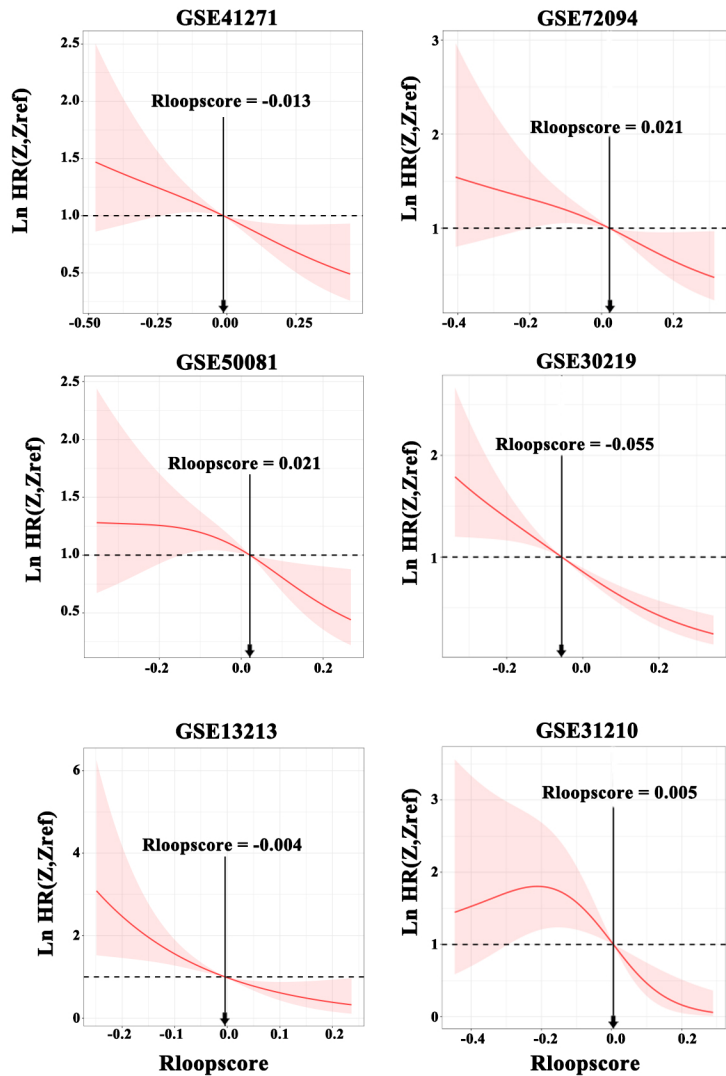**B****Group****Roop<sup>Low</sup> vs Roop<sup>High</sup>**

LUAD  
 GSE13213  
 GSE30219  
 GSE31210  
 GSE41271  
 GSE72094

**age >60 vs age ≤ 60**

GSE30219

**Male vs Female**

GSE30219  
 GSE50081  
 GSE72094

**Stage III-IV vs Stage I-II**

LUAD  
 GSE13213  
 GSE72094

**EGFR Mut vs WT**

GSE31210  
 GSE72094

**KRAS Mut vs WT**

GSE72094

**TP53 Mut vs WT**

GSE72094

**HR****P value**    **HR(CI Low-CI High)**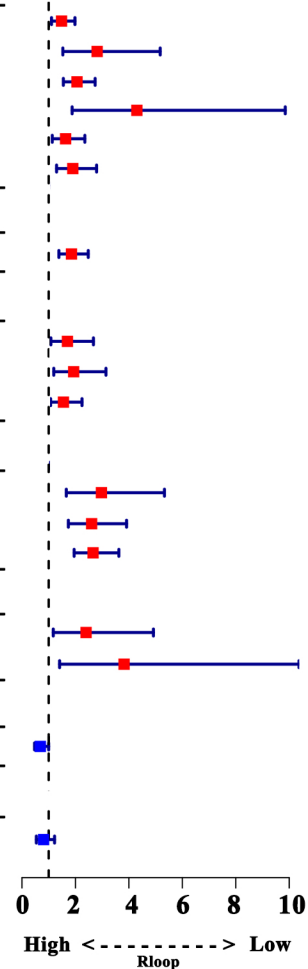

| P value | HR(CI Low-CI High)  |
|---------|---------------------|
| 0.008   | 1.481(1.106–1.983)  |
| <0.001  | 2.813(1.530–5.173)  |
| <0.001  | 2.060(1.549–2.738)  |
| <0.001  | 4.300(1.877–9.851)  |
| 0.008   | 1.633(1.133–2.353)  |
| 0.001   | 1.902(1.296–2.793)  |
| <0.001  | 1.852(1.382–2.481)  |
| 0.021   | 1.701(1.082–2.674)  |
| 0.008   | 1.934(1.190–3.143)  |
| 0.020   | 1.552(1.072–2.246)  |
| <0.001  | 2.660(1.952–3.626)  |
| <0.001  | 2.974(1.659–5.331)  |
| <0.001  | 2.607(1.736–3.914)  |
| 0.017   | 2.400(1.171–4.919)  |
| 0.008   | 3.821(1.408–10.367) |
| 0.049   | 0.687(0.472–0.999)  |
| 0.313   | 0.810(0.538–1.220)  |
