# Supplementary material for: Aberrant R-loop–mediated immune evasion, cellular communication, and metabolic reprogramming affect cancer progression: a single-cell analysis
Source: Mol Cancer. 2024 Jan 10;23:11. doi: 10.1186/s12943-023-01924-6 (PMC10777569; doi:10.1186/s12943-023-01924-6)
Supplement: Supplementary file 11 — Additional file 11: Table S1. Details of datasets used in this study. [file 12943_2023_1924_MOESM11_ESM.xlsx]

## Sheet: List of all available datasets
No.	Dataset	Source	Sample Type	Organism	Number and description of samples in this study	Figures Displayed in	Treatment	PubMed ID
Single cell RNA seq cohorts
1	GSE131907	Kim N. et al.	LUAD	Homo sapiens	11 Primary Lung Tissue, 10 metastatic brain tissue	Figure 1,2,3		PMID: 32385277
2	GSE123904	Laughney AM. et al.	LUAD	Homo sapiens	6 Primary lung tissue, 3 brain metasis with chemotherapy	Figure 1,2,3		PMID: 32042191
3	GSE146100	Zhang C, Yin K. et al.	LUAD	Homo sapiens	three resected nodules with neoadjuvant pembrolizumab	Figure 2	Neoadjuvant pembrolizumab	PMID: 33820821
4	PRJNA591860	Maynard A. et al.	LUAD	Homo sapiens	37 tissues from 21 patients received TKIs after quality control (see method)	Figure 4		PMID: 32822576
Bulk RNA-seq datasets of LUAD cohorts
5	TCGA	The Cancer Genome Atlas Research Network	LUAD	Homo sapiens	569 LUAD samples	Figure 5		PMID: 24071849
6	GSE13213	Tomida S, Takeuchi T. et al.	LUAD	Homo sapiens	117 LUAD samples	Figure 5		PMID: 19414676
7	GSE30219	Rousseaux S, Debernardi A. et al.	LUAD	Homo sapiens	307 LUAD samples	Figure 5		PMID: 23698379
8	GSE31210	Okayama H. et al.	LUAD	Homo sapiens	226 LUAD patients	Figure 5		PMID: 22080568
9	GSE41271	Sato M, Larsen JE. et al.	LUAD	Homo sapiens	275 LUAD patients	Figure 5		PMID: 23449933
10	GSE50081	Der SD, Sykes J. et al.	LUAD	Homo sapiens	181 LUAD patients	Figure 5		PMID: 24305008
11	GSE72094	Schabath MB. et al.	LUAD	Homo sapiens	442 LUAD patients	Figure 5		PMID: 26477306
Chemotherapy
12	GSE42127	Tang H. et al.	LUAD	Homo sapiens	39 LUAD patients received adjuvant chemotherapy and 94 LUAD patients did not receive	Figure 6	Carboplatin plus Taxanes	PMID: 23357979
13	GSE14814	Zhu CQ. et al.	LUAD	Homo sapiens	15 LUAD patients received adjuvant chemotherapy	Figure 6	Adjuvant cisplatin/vinorelbine	PMID: 20823422
14	GSE25055	Hatzis C. et al.	BRCA	Homo sapiens	306 HER2-negative breast cancer cases treated with taxane-anthracycline chemotherapy	Figure 6	Taxane-anthracycline chemotherapy	PMID: 21558518
15	GSE25065	Hatzis C. et al.	BRCA	Homo sapiens	182 HER2-negative breast cancer cases treated with taxane-anthracycline chemotherapy	Figure 6	Taxane-anthracycline chemotherapy	PMID: 21558518
16	GSE32603	Magbanua MJ, Wolf DM. et al.	BRCA	Homo sapiens	221 BRCA patients who neoadjuvant chemotherapy	Figure 6	Taxane/Anthracycline	PMID: 26021444
17	GSE63885	Lisowska KM, Olbryt M. et al.	OV	Homo sapiens	101 ovarian cancer patients Gene expression profiling	Figure 6	Taxane/Cyclophosphamide	PMID: 24478986
18	GSE20194	Shi L. et al.	BRCA	Homo sapiens	278 Patients with preoperative (neoadjuvant) chemotherapy	Figure 6	Paclitaxel, 5-fluorouracil, Cyclophosphamide or doxorubicin	PMID: 20676074
19	GSE41998	Horak CE. et al.	BRCA	Homo sapiens	279 BRCA patients who neoadjuvant chemotherapy	Figure 6	Doxorubicin/Cyclophosphamide/Ixabepilone/Paclitaxel	PMID: 23340299
20	GSE3964	Graudens E. et al.	CRC	Homo sapiens	60 CRC patients combined chemotherapy	Figure 6	FA/5FU/Irinotecan	PMID: 16542501
Targeted cohorts
21	GSE61676	Baty F. et al.	NSCLC	Homo sapiens	86 NSCLC patients targeted therapy	Figure 6	Bevacizumab/Erlotinib	PMID: 28359318
22	GSE31428	Saintigny P. et al.	NSCLC	Homo sapiens	37 NSCLC patients targeted therapy	Figure 6	Sorafenib
23	GSE41994	Jansen MP. et al.	BRCA	Homo sapiens	107 BRCA patients inhibitor therapy	Figure 6	Anastrozole/Letrozole/Exemestane	PMID: 24242068
24	GSE16391	Desmedt C. et al.	BRCA	Homo sapiens	55 microarray experiments from primary breast tumors of endocrine-treated patients	Figure 6	Tamoxifen	PMID: 19573224
25	GSE68871	Terragna C. et al.	MM	Homo sapiens	118 MM patients bortezomib-thalidomide-dexamethasone (VTD) first line therapy	Figure 6	Bortezomib/Thalidomide/Dexamethasone	PMID: 26575327
26	GSE109211	Pinyol R. et al.	LIHC	Homo sapiens	67 samples treated with Sorafenib (Sor) and 73 are Placebo(Plac)	Figure 6	Sorafenib	PMID: 30108162
27	GSE99898	Rizos H. et al.	SKCM	Homo sapiens	38 melanoma resistance to MAPK inhibitors	Figure 6	Vemurafenib/Dabrafenib	PMID: 28724663
Immunotherapy cohorts
28	GSE91061	Riaz N. et al.	SKCM	Homo sapiens	51 melanoma patients treated anti-PD-1	Figure 6	Nivolumab	PMID: 29033130
29	GSE78220	Hugo W. et al.	SKCM	Homo sapiens	28 patients with pre-anti-PD-1 therapy	Figure 6	Pembrolizumab	PMID: 26997480
30	GSE135222	Jung H. et al.	NSCLC	Homo sapiens	27 NSCLC patients treated anti-PD-1	Figure 6	Anti-PD-1/PD-L1	PMID: 31537801
31	IMvigor210	Galsky MD. et al.	BLCA	Homo sapiens	298 patients with anti-PD-1 therapy	Figure 6	Atezolizumab	PMID: 32416780
32	PMID: 32472114	Braun DA. et al.	ccRCC	Homo sapiens	PD-1 blockade	Figure 6	Nivolumab	PMID: 32472114
33	GSE166449	Lee J, Lee S. et al.	NSCLC	Homo sapiens	22 derived genetic interactions predict patient response	Figure 6	Pembrolizumab	PMID: 33857424
34	GSE145996	Amato CM. et al.	SKCM	Homo sapiens	14 patients Anti-PD1 Immunotherapy	Figure 6	Anti-PD1	PMID: 32708981
35	GSE35640	Dizier B. et al.	SKCM	Homo sapiens	56 patients with immunotherapy	Figure 6	MAGE-A3	PMID: 23715562
36	GSE115821	Auslander N, Zhang G. et al.	SKCM	Homo sapiens	37 patients metastatic melanoma immune checkpoint blockade therapy	Figure 6	Immune Checkpoint Blockade Therapy/PRE Immune Checkpoint Blockade Therapy (On dabrafenib+trametinib)	PMID: 30127394
37	GSE122220	Jaiswal A, Wang Z. et al.	SKCM	Homo sapiens	10 patients treated with checkpoint inhibitors	Figure 6	Ipilimumab+PD1
38	PMID: 33806963	Shiuan E, Reddy A. et al.	ccRCC	Homo sapiens	anti-programmed death 1 (PD-1)/PD-L1 therapy	Figure 6	Anti-PD-1/PD-L1	PMID: 33806963
39	GSE176307	Kim WY. et.al	Urothelial cancer	Homo sapiens	89 patients with metastatic UC treated with ICB	Figure 6	Atezolizumab/Avelumab/Durvalumab/Nivolumab/Pembrolizumab	PMID: 34294892
40	GSE99070	Lee H, Jang H. et al.	MPM	Homo sapiens	10 patients of MPM treated with anti-PD1 therapy	Figure 6	Anti–PD-1 therapy after they had progressed after treatment with a platinum-based agent and pemetrexed	PMID: 29618661
41	GSE126044	Cho JW. et al.	NSCLC	Homo sapiens	16 NSCLC patients treated anti-PD-1	Figure 6	Nivolumab/pembrolizumab	PMID: 32879421
42	GSE111636	Homet Moreno B. et al.	UC	Homo sapiens	11 patients inmunotherapy	Figure 6	Pembrolizumab
43	GSE67501	Ascierto ML. et al.	ccRCC	Homo sapiens	11 patients anti-PD-1 (Nivolumab) immunotherapy	Figure 6	Nivolumab	PMID: 27491898

## Sheet: Sample ID matched ressult
Patients ID in this study	Patients ID in GSE131907 / GSE123904
P1	LUNG_T09
P2	LUNG_T08
P3	LX676
P4	LX661
P5	LUNG_T25
P6	LX682
P7	LUNG_T06
P8	LUNG_T34
P9	LUNG_T31
P10	LX653
P11	LUNG_T30
P12	LUNG_T19
P13	LX675
P14	LX684
P15	LUNG_T20
P16	LUNG_T18
P17	LUNG_T28
M1	NS_06
M2	NS_16
M3	NS_02
M4	NS_19
M5	NS_17
M6	NS_04
M7	NS_13
M8	NS_03
M9	NS_12
M10	NS_07
C1	LX701
C2	LX255B
C3	LX681

## Sheet: summary of clinical features
Supplementary Table S1. Details of datasets used in this study.
	TCGA-LUAD			GSE13213			GSE30219			GSE31210			GSE41271			GSE50081			GSE72094
	RloopHigh	RloopLow	Total	RloopHigh	RloopLow	Total	RloopHigh	RloopLow	Total	RloopHigh	RloopLow	Total	RloopHigh	RloopLow	Total	RloopHigh	RloopLow	Total	RloopHigh	RloopLow	Total
Patients	258	259	517	58	59	117	146	147	293	113	113	226	135	136	275	75	106	181	199	199	398
Age
<= 60	73 (44.2%)	92 (55.8%)	165(31.3%)	26 (50.0%)	26 (50.0%)	52 (44.4%)	69 (53.1%)	61 (46.9%)	130 (44.4%)	49(45.4%)	59 (54.6%)	108 (47.8%)	0	0	0	9 (27.3%)	24 (72.7%)	33 (30.6%)	29 (50.9%)	28 (49.1%)	57 (14.3%)
> 60	180 (52.6%)	162 (47.4%)	342(66.2%)	32 (49.2%)	33 (50.8%)	65 (55.6%)	76 (46.9%)	86 (53.1%)	162 (55.3%)	64(54.2%)	54 (45.8%)	118 (52.2%)	0	0	0	66 (44.6%)	82 (55.4%)	148 (65.7%)	170 (51.4%)	161 (48.6%)	331(85.7%)
Gender
F	158 (56.7%)	121 (43.3%)	279 (54.0%)	30 (52.6%)	27 (47.4%)	57 (48.7%)	28 (65.1%)	15 (34.9%)	43 (14.7%)	68 (56.2%)	53 (43.8%)	121(53.5%)	70 (55.1%)	57 (44.9%)	127 (46.2%)	24 (28.9%)	59 (71.1%)	83(45.9%)	110(49.5%)	112(50.5%)	222 (55.8%)
M	100 (42.0%)	138 (58.0%)	238 (46.0%)	28 (46.7%)	32 (53.3%)	60 (51.3%)	118 (41.2%)	132 (52.8%)	250 (85.3%)	45 (42.9%)	60 (57.1%)	105(46.5%)	65 (45.1%)	79(54.9%)	144(53.8%)	51 (52.0%)	47(48.0%)	98 (54.1%)	89(50.6%)	87 (49.4%)	176 (44.2%)
Stage
I-II	210 (52.0%)	194 (48.0%)	404 (78.1%)	50 (54.3%)	42 (45.7%)	92 (78.6%)	0	0	0	113(50.0%)	113 (50.0%)	226 (100%)	0	0	0	75 (41.4%)	106 (58.6%)	181 (100%)	164 (51.1%)	157 (48.9%)	321(81.9%)
III- IV	42 (40.0%)	63 (60.0%)	105(21.9%)	8 (32.0%)	17 (68.0%)	25 (21.4%)	0	0	0	0	0	0	0	0	0	0	0	0	33(45.8%)	39 (54.2%)	72(18.1%)
