# Supplementary material for: Aberrant R-loop–mediated immune evasion, cellular communication, and metabolic reprogramming affect cancer progression: a single-cell analysis
Source: Mol Cancer. 2024 Jan 10;23:11. doi: 10.1186/s12943-023-01924-6 (PMC10777569; doi:10.1186/s12943-023-01924-6)
Supplement: Supplementary file 12 — Additional file 12: Table S2. The list of R-loop regulators. [file 12943_2023_1924_MOESM12_ESM.xlsx]

## Sheet: Sheet1
Supplementary Table S2. The list of R-loop regulators
Rloop	WGCNA Select
ATM	TRUE
FANCI	TRUE
RNASEH2A	TRUE
RPA3	TRUE
XRN2	TRUE
ATXN2	TRUE
AURKA	TRUE
CENPA	TRUE
PAF1	TRUE
RBM8A	TRUE
SRPK2	TRUE
TCEA1	TRUE
XRCC5	TRUE
SAMHD1	TRUE
SUPT5H	TRUE
CCT3	TRUE
CFL1	TRUE
DDX46	TRUE
ILF2	TRUE
KPNB1	TRUE
PKM	TRUE
PRDX1	TRUE
PRPF40A	TRUE
RACK1	TRUE
ZC3H15	TRUE
ATP2A2	TRUE
AURKB	TRUE
BUD31	TRUE
C1orf35	TRUE
C7orf50	TRUE
CCDC47	TRUE
CDCA8	TRUE
CDK1	TRUE
CSNK1A1	TRUE
DEK	TRUE
EEF1D	TRUE
EIF2S2	TRUE
EIF3F	TRUE
EXOSC4	TRUE
FASN	TRUE
FMC1	TRUE
FN1	TRUE
FSCN1	TRUE
GNB2	TRUE
HLA-DRB1	TRUE
HMGB2	TRUE
HSPB1	TRUE
KCNK1	TRUE
KIFC1	TRUE
KMT2A	TRUE
KPNA2	TRUE
KTN1	TRUE
LDHA	TRUE
MBNL1	TRUE
MED19	TRUE
MND1	TRUE
MPHOSPH10	TRUE
MRTO4	TRUE
MSN	TRUE
NCAPH	TRUE
NUCKS1	TRUE
OAS3	TRUE
P4HB	TRUE
PEG10	TRUE
PNN	TRUE
PPP1CC	TRUE
PSMD6	TRUE
RAB13	TRUE
RAB1A	TRUE
RAE1	TRUE
RPS16	TRUE
RRBP1	TRUE
SF3B2	TRUE
SNRPE	TRUE
SPOUT1	TRUE
SQSTM1	TRUE
SRPRA	TRUE
SRPRB	TRUE
SRSF5	TRUE
STAT1	TRUE
TAOK3	TRUE
THYN1	TRUE
TNRC6B	TRUE
TOP2A	TRUE
TPX2	TRUE
TUBB	TRUE
UTP11	TRUE
VAPA	TRUE
VDAC3	TRUE
WASF2	TRUE
YWHAG	TRUE
YWHAZ	TRUE
ADAR	FALSE
AQR	FALSE
ATR	FALSE
BLM	FALSE
BRCA1	FALSE
BRCA2	FALSE
BRD4	FALSE
DDX1	FALSE
DDX21	FALSE
DDX5	FALSE
DHX9	FALSE
ERCC4	FALSE
ERCC5	FALSE
EWSR1	FALSE
EXOSC10	FALSE
FANCA	FALSE
FANCD2	FALSE
FANCM	FALSE
FEN1	FALSE
FUS	FALSE
HNRNPU	FALSE
MTREX	FALSE
NCL	FALSE
NONO	FALSE
POLR3G	FALSE
PRMT5	FALSE
RAD52	FALSE
RNASEH1	FALSE
RNASEH2B	FALSE
RNASEH2C	FALSE
RNF2	FALSE
RPA1	FALSE
RPA2	FALSE
RTEL1	FALSE
SETX	FALSE
SF3B1	FALSE
SF3B3	FALSE
SFPQ	FALSE
SMN1	FALSE
SRSF1	FALSE
SRSF2	FALSE
TARDBP	FALSE
THOC1	FALSE
TOP1	FALSE
TOP3B	FALSE
U2AF1	FALSE
WRN	FALSE
ZNF346	FALSE
AGO2	FALSE
APOBEC3G	FALSE
ATAD5	FALSE
ATRX	FALSE
BRD2	FALSE
BUB3	FALSE
CDCA7	FALSE
CGAS	FALSE
DDX17	FALSE
DDX19B	FALSE
DDX23	FALSE
DDX39B	FALSE
ERCC6L2	FALSE
EXOG	FALSE
FAM120B	FALSE
FMR1	FALSE
GADD45A	FALSE
GLE1	FALSE
HELLS	FALSE
INO80	FALSE
LMNA	FALSE
MAT2A	FALSE
MDM2	FALSE
MDM4	FALSE
METTL3	FALSE
METTL8	FALSE
NFAT5	FALSE
PNPT1	FALSE
POLDIP3	FALSE
POT1	FALSE
PPP1R10	FALSE
PRIMPOL	FALSE
RAD51	FALSE
RAD9A	FALSE
RBM14	FALSE
RECQL5	FALSE
RNF168	FALSE
RNGTT	FALSE
RPRD1B	FALSE
SAP130	FALSE
SIN3A	FALSE
SIRT7	FALSE
SLU7	FALSE
SMARCAL1	FALSE
SNRPA1	FALSE
STAG1	FALSE
STAG2	FALSE
SUPV3L1	FALSE
TCOF1	FALSE
TERF1	FALSE
TP53	FALSE
WAS	FALSE
WDR33	FALSE
YTHDF2	FALSE
ZBTB24	FALSE
ZNF207	FALSE
ADARB1	FALSE
AICDA	FALSE
ALKBH2	FALSE
ALKBH3	FALSE
APEX1	FALSE
C1orf109	FALSE
CARM1	FALSE
CDC73	FALSE
CHEK1	FALSE
CHEK2	FALSE
DDB2	FALSE
DDX11	FALSE
DDX18	FALSE
DDX41	FALSE
DDX43	FALSE
DDX47	FALSE
DHX33	FALSE
DNMT3B	FALSE
DROSHA	FALSE
ENDOG	FALSE
ERCC6	FALSE
EXOSC3	FALSE
FANCG	FALSE
FANCL	FALSE
GRSF1	FALSE
HNRNPD	FALSE
KAT8	FALSE
KDM6B	FALSE
MDC1	FALSE
MRE11	FALSE
MYCN	FALSE
NLRP3	FALSE
NPM1	FALSE
NSD2	FALSE
OGG1	FALSE
PARP1	FALSE
PCNA	FALSE
PHF2	FALSE
PHF5A	FALSE
PHF6	FALSE
PIF1	FALSE
PMS1	FALSE
POLR3A	FALSE
PRKDC	FALSE
PRMT1	FALSE
RAD1	FALSE
RECQL	FALSE
RECQL4	FALSE
RNPS1	FALSE
SAFB2	FALSE
SEM1	FALSE
SF3A3	FALSE
SP1	FALSE
SSBP1	FALSE
SSRP1	FALSE
SUPT16H	FALSE
SUPT6H	FALSE
TDRD3	FALSE
TERF2	FALSE
TRAIP	FALSE
TRDMT1	FALSE
TREX1	FALSE
UBE2B	FALSE
USP42	FALSE
XPO1	FALSE
YTHDC1	FALSE
ZPR1	FALSE
ABCF1	FALSE
ACIN1	FALSE
ALDOA	FALSE
ALYREF	FALSE
APOBEC3C	FALSE
CCT2	FALSE
CCT4	FALSE
CCT6A	FALSE
CCT8	FALSE
CDC5L	FALSE
CLTC	FALSE
CMAS	FALSE
CORO1A	FALSE
DARS1	FALSE
DDB1	FALSE
DDX3X	FALSE
DDX6	FALSE
DHX30	FALSE
DHX36	FALSE
DKC1	FALSE
DNAJA3	FALSE
DNMT1	FALSE
EEF1A1	FALSE
EEF1G	FALSE
EEF2	FALSE
EFTUD2	FALSE
EIF2AK2	FALSE
EIF2S1	FALSE
EIF2S3	FALSE
EIF3D	FALSE
EIF4A1	FALSE
EIF4A3	FALSE
EIF5A	FALSE
EIF5B	FALSE
ENO1	FALSE
EZR	FALSE
FAM98A	FALSE
FBL	FALSE
FIP1L1	FALSE
FRG1	FALSE
FXR1	FALSE
G3BP1	FALSE
G3BP2	FALSE
GNL3	FALSE
GTPBP4	FALSE
H1-5	FALSE
H2BC5	FALSE
HDAC1	FALSE
HEATR1	FALSE
HNRNPA0	FALSE
HNRNPA1	FALSE
HNRNPA2B1	FALSE
HNRNPA3	FALSE
HNRNPAB	FALSE
HNRNPC	FALSE
HNRNPDL	FALSE
HNRNPF	FALSE
HNRNPK	FALSE
HNRNPL	FALSE
HNRNPM	FALSE
HNRNPUL1	FALSE
HNRNPUL2	FALSE
HSP90AB1	FALSE
HSPA1A	FALSE
HSPA8	FALSE
IGF2BP1	FALSE
IGF2BP3	FALSE
ILF3	FALSE
LARP1	FALSE
LARS1	FALSE
LBR	FALSE
MCM3	FALSE
MCM5	FALSE
MKI67	FALSE
MOV10	FALSE
MYBBP1A	FALSE
MYH9	FALSE
NAT10	FALSE
NCOA5	FALSE
NIFK	FALSE
NOL6	FALSE
NOP2	FALSE
NOP56	FALSE
NOP58	FALSE
NPM3	FALSE
PA2G4	FALSE
PABPC1	FALSE
PABPC4	FALSE
PCBP1	FALSE
PCBP2	FALSE
PDCD11	FALSE
PFN1	FALSE
PGAM5	FALSE
PGK1	FALSE
PHGDH	FALSE
PLEC	FALSE
PLRG1	FALSE
POP1	FALSE
PPIA	FALSE
PPP2R1A	FALSE
PRPF19	FALSE
PRPF3	FALSE
PRPF4	FALSE
PRPF8	FALSE
PSIP1	FALSE
PTBP1	FALSE
PWP1	FALSE
PWP2	FALSE
RAB7A	FALSE
RAC2	FALSE
RALY	FALSE
RARS1	FALSE
RBBP4	FALSE
RBBP6	FALSE
RBM15	FALSE
RBM25	FALSE
RBM39	FALSE
RBM4	FALSE
RBMX	FALSE
RCC2	FALSE
RTCB	FALSE
RTRAF	FALSE
RUVBL2	FALSE
SAFB	FALSE
SART1	FALSE
SART3	FALSE
SERBP1	FALSE
SLC25A5	FALSE
SMARCA4	FALSE
SMARCA5	FALSE
SND1	FALSE
SNRNP200	FALSE
SNRNP70	FALSE
SNRPD1	FALSE
SNRPD2	FALSE
SNW1	FALSE
SON	FALSE
SRP14	FALSE
SRPK1	FALSE
SRRM2	FALSE
SRSF10	FALSE
SRSF7	FALSE
STAU1	FALSE
STRAP	FALSE
SYNCRIP	FALSE
TAF15	FALSE
TARS1	FALSE
TBL3	FALSE
TCP1	FALSE
THRAP3	FALSE
TRA2B	FALSE
TSR1	FALSE
U2AF2	FALSE
U2SURP	FALSE
UHRF1	FALSE
UPF1	FALSE
USP10	FALSE
UTP14A	FALSE
VARS1	FALSE
VDAC2	FALSE
VIM	FALSE
WDR3	FALSE
WDR36	FALSE
YBX1	FALSE
YBX3	FALSE
YWHAE	FALSE
ZC3H11A	FALSE
ZC3HAV1	FALSE
ZFR	FALSE
AARS1	FALSE
AATF	FALSE
ABCE1	FALSE
ABCF2	FALSE
ACACA	FALSE
ACADVL	FALSE
ACAP1	FALSE
ACAT1	FALSE
ACLY	FALSE
ACO2	FALSE
ACP1	FALSE
ACTB	FALSE
ACTR3	FALSE
ADARB2	FALSE
AGK	FALSE
AGPS	FALSE
AHCTF1	FALSE
AHCY	FALSE
AHNAK	FALSE
AHSA1	FALSE
AIFM1	FALSE
AIMP1	FALSE
AIMP2	FALSE
AKAP17A	FALSE
AKR1B1	FALSE
AKR1B15	FALSE
ALDH18A1	FALSE
ANKHD1	FALSE
ANKRD17	FALSE
ANXA2	FALSE
ANXA6	FALSE
AP2A1	FALSE
AP2B1	FALSE
AP2M1	FALSE
AP3B1	FALSE
AP3D1	FALSE
API5	FALSE
APOBEC3B	FALSE
APOBEC3D	FALSE
ARCN1	FALSE
ARF1	FALSE
ARF3	FALSE
ARF4	FALSE
ARGLU1	FALSE
ARHGAP17	FALSE
ARHGAP4	FALSE
ARHGEF1	FALSE
ARHGEF2	FALSE
ARPC2	FALSE
ASCC3	FALSE
ASNS	FALSE
ATAD3A	FALSE
ATIC	FALSE
ATP5F1A	FALSE
ATP5F1B	FALSE
ATP5F1C	FALSE
ATP5MG	FALSE
ATP5PB	FALSE
ATP5PD	FALSE
ATP5PO	FALSE
BAZ1B	FALSE
BAZ2A	FALSE
BCLAF1	FALSE
BMS1	FALSE
BOP1	FALSE
BRD7	FALSE
BRD9	FALSE
BRIX1	FALSE
C1QBP	FALSE
CACYBP	FALSE
CAD	FALSE
CAND1	FALSE
CANX	FALSE
CAP1	FALSE
CAPRIN1	FALSE
CAPZA1	FALSE
CAPZB	FALSE
CBX3	FALSE
CBX5	FALSE
CBX8	FALSE
CCAR1	FALSE
CCAR2	FALSE
CCDC124	FALSE
CCDC137	FALSE
CCDC59	FALSE
CCDC86	FALSE
CCNT1	FALSE
CCT5	FALSE
CCT7	FALSE
CDC40	FALSE
CDYL	FALSE
CDYL2	FALSE
CEBPZ	FALSE
CENPC	FALSE
CENPV	FALSE
CHAF1B	FALSE
CHD4	FALSE
CHERP	FALSE
CHTOP	FALSE
CIRBP	FALSE
CKAP5	FALSE
CLASP1	FALSE
CLIC4	FALSE
CLINT1	FALSE
CLIP2	FALSE
CLUH	FALSE
COIL	FALSE
COPA	FALSE
COPB1	FALSE
COPB2	FALSE
CORO1C	FALSE
CPSF1	FALSE
CPSF7	FALSE
CRNKL1	FALSE
CRYZ	FALSE
CS	FALSE
CSDE1	FALSE
CSE1L	FALSE
CSNK2A1	FALSE
CSNK2A2	FALSE
CTCF	FALSE
CTPS1	FALSE
CUL3	FALSE
CUL4A	FALSE
CWC25	FALSE
CYFIP2	FALSE
DAP3	FALSE
DAZAP1	FALSE
DCAF13	FALSE
DDOST	FALSE
DDX24	FALSE
DDX27	FALSE
DDX31	FALSE
DDX39A	FALSE
DDX3Y	FALSE
DDX49	FALSE
DDX50	FALSE
DDX52	FALSE
DDX54	FALSE
DDX56	FALSE
DDX58	FALSE
DECR1	FALSE
DENND3	FALSE
DHX15	FALSE
DHX16	FALSE
DHX29	FALSE
DHX37	FALSE
DHX38	FALSE
DIAPH1	FALSE
DIMT1	FALSE
DIS3	FALSE
DIS3L	FALSE
DNAJA1	FALSE
DNAJC13	FALSE
DNAJC2	FALSE
DNAJC8	FALSE
DNTTIP2	FALSE
DOCK10	FALSE
DOCK2	FALSE
DOCK8	FALSE
DPYSL5	FALSE
DRG1	FALSE
DSG1	FALSE
DSP	FALSE
DYNC1H1	FALSE
EBNA1BP2	FALSE
EEF1A1P5	FALSE
EEF1B2	FALSE
EEFSEC	FALSE
EHD1	FALSE
EHD4	FALSE
EIF2B4	FALSE
EIF2D	FALSE
EIF2S3B	FALSE
EIF3A	FALSE
EIF3B	FALSE
EIF3C	FALSE
EIF3I	FALSE
EIF3L	FALSE
EIF4A2	FALSE
EIF4G1	FALSE
EIF4G2	FALSE
EIF5A2	FALSE
EIF5AL1	FALSE
EIF6	FALSE
ELAVL1	FALSE
EMC1	FALSE
EMD	FALSE
EMG1	FALSE
EML4	FALSE
EPHB6	FALSE
EPPK1	FALSE
EPRS1	FALSE
EPS8	FALSE
ERH	FALSE
ESYT1	FALSE
ETF1	FALSE
EXOSC6	FALSE
EXOSC9	FALSE
FAM120A	FALSE
FAM98B	FALSE
FARSA	FALSE
FARSB	FALSE
FBXO31	FALSE
FCF1	FALSE
FKBP3	FALSE
FKBP4	FALSE
FLG2	FALSE
FLII	FALSE
FLNA	FALSE
FMNL1	FALSE
FNBP1	FALSE
FTSJ3	FALSE
FUBP1	FALSE
FUBP3	FALSE
GAPDH	FALSE
GAR1	FALSE
GARS1	FALSE
GART	FALSE
GCN1	FALSE
GEMIN5	FALSE
GFPT1	FALSE
GIGYF2	FALSE
GNAI2	FALSE
GNAI3	FALSE
GNB1	FALSE
GNL2	FALSE
GNL3L	FALSE
GOLGA2	FALSE
GPATCH4	FALSE
GRWD1	FALSE
GTF2B	FALSE
GTF2F1	FALSE
GTF2I	FALSE
H1-0	FALSE
H1-1	FALSE
H1-10	FALSE
H1-2	FALSE
H1-3	FALSE
H2AC11	FALSE
H2AC12	FALSE
H2AC14	FALSE
H2AC18	FALSE
H2AC20	FALSE
H2AC4	FALSE
H2AC6	FALSE
H2AC7	FALSE
H2AJ	FALSE
H2AW	FALSE
H2AX	FALSE
H2BC1	FALSE
H2BC12	FALSE
H2BC13	FALSE
H2BC14	FALSE
H2BC15	FALSE
H2BC18	FALSE
H2BC9	FALSE
H3C15	FALSE
H4C1	FALSE
H4C8	FALSE
HADHA	FALSE
HADHB	FALSE
HARS1	FALSE
HBS1L	FALSE
HCFC1	FALSE
HDAC2	FALSE
HDAC8	FALSE
HDLBP	FALSE
HLA-A	FALSE
HLA-DQB1	FALSE
HMGB1	FALSE
HMGN2	FALSE
HMGN3	FALSE
HNRNPA1L2	FALSE
HNRNPCL1	FALSE
HNRNPH1	FALSE
HNRNPH2	FALSE
HNRNPH3	FALSE
HNRNPLL	FALSE
HNRNPR	FALSE
HP1BP3	FALSE
HRAS	FALSE
HRNR	FALSE
HSD17B12	FALSE
HSD17B4	FALSE
HSP90AA1	FALSE
HSP90AB2P	FALSE
HSP90B1	FALSE
HSPA4	FALSE
HSPA5	FALSE
HSPA9	FALSE
HSPD1	FALSE
HSPH1	FALSE
HUWE1	FALSE
HYOU1	FALSE
IARS1	FALSE
IDH2	FALSE
IFI16	FALSE
IGHA1	FALSE
IK	FALSE
IMMT	FALSE
IMP3	FALSE
IMP4	FALSE
IMPDH2	FALSE
INCENP	FALSE
INPP5D	FALSE
IPO5	FALSE
IPO9	FALSE
IRF4	FALSE
ISG20L2	FALSE
KARS1	FALSE
KHDRBS1	FALSE
KHSRP	FALSE
KIF22	FALSE
KIF23	FALSE
KIF2A	FALSE
KIF5B	FALSE
KNOP1	FALSE
KPRP	FALSE
KRAS	FALSE
KRI1	FALSE
KRR1	FALSE
LARP4B	FALSE
LBHD1	FALSE
LCP1	FALSE
LETM1	FALSE
LIG3	FALSE
LLPH	FALSE
LMNB1	FALSE
LMNB2	FALSE
LOC102724334	FALSE
LONP1	FALSE
LRPPRC	FALSE
LRRC47	FALSE
LRRC59	FALSE
LSM14A	FALSE
LSP1	FALSE
LTV1	FALSE
LUC7L2	FALSE
LUC7L3	FALSE
LYAR	FALSE
MACF1	FALSE
MACROH2A1	FALSE
MAGOH	FALSE
MAGOHB	FALSE
MAK16	FALSE
MAP1S	FALSE
MAP4	FALSE
MAP4K1	FALSE
MAPRE1	FALSE
MARS1	FALSE
MATR3	FALSE
MBD2	FALSE
MCM2	FALSE
MCM4	FALSE
MCM6	FALSE
ME2	FALSE
MEPCE	FALSE
METAP2	FALSE
MFAP1	FALSE
MNDA	FALSE
MORF4L1	FALSE
MPG	FALSE
MRPL12	FALSE
MRPS7	FALSE
MS4A1	FALSE
MSH2	FALSE
MSH3	FALSE
MSH6	FALSE
MTA2	FALSE
MTDH	FALSE
MTHFD1	FALSE
MTHFD1L	FALSE
MYL12A	FALSE
MYO1C	FALSE
MYO1E	FALSE
MYO5A	FALSE
MYO9B	FALSE
NAA25	FALSE
NACA	FALSE
NAP1L1	FALSE
NAP1L4	FALSE
NARS1	FALSE
NCAPD2	FALSE
NCAPG	FALSE
NCBP1	FALSE
NCF1	FALSE
NCF2	FALSE
NCKAP1L	FALSE
NDUFA9	FALSE
NDUFS1	FALSE
NDUFS2	FALSE
NFKB1	FALSE
NFKB2	FALSE
NGDN	FALSE
NHP2	FALSE
NKAP	FALSE
NKAPL	FALSE
NKRF	FALSE
NLE1	FALSE
NMT1	FALSE
NOC3L	FALSE
NOC4L	FALSE
NOL10	FALSE
NOL11	FALSE
NOL12	FALSE
NOL7	FALSE
NOLC1	FALSE
NOP10	FALSE
NOP16	FALSE
NOP53	FALSE
NOP9	FALSE
NOSIP	FALSE
NRAS	FALSE
NSA2	FALSE
NSUN2	FALSE
NSUN5	FALSE
NUDC	FALSE
NUFIP2	FALSE
NUMA1	FALSE
NUP133	FALSE
NUP155	FALSE
NUP205	FALSE
NUP210	FALSE
NUP214	FALSE
NUP54	FALSE
NUP58	FALSE
NUP62	FALSE
NUP93	FALSE
NUP98	FALSE
NVL	FALSE
NXF1	FALSE
OTUD6B	FALSE
PAFAH1B3	FALSE
PAICS	FALSE
PAK1IP1	FALSE
PARP2	FALSE
PCBP3	FALSE
PCF11	FALSE
PDIA3	FALSE
PDIA5	FALSE
PDIA6	FALSE
PDS5A	FALSE
PDS5B	FALSE
PES1	FALSE
PFKL	FALSE
PFKP	FALSE
PGAM1	FALSE
PGAM2	FALSE
PHB	FALSE
PHB2	FALSE
PHIP	FALSE
PINX1	FALSE
PIP4K2A	FALSE
PIP5K1A	FALSE
PLCG2	FALSE
PLD1	FALSE
PLEKHO1	FALSE
PNKP	FALSE
PNO1	FALSE
POLB	FALSE
POLD1	FALSE
POLR1A	FALSE
POLR1F	FALSE
POLR1G	FALSE
POLR2A	FALSE
POLR2B	FALSE
POM121C	FALSE
PPA1	FALSE
PPAN	FALSE
PPIB	FALSE
PPIG	FALSE
PPP1CB	FALSE
PRDX5	FALSE
PRDX6	FALSE
PRKRA	FALSE
PRPF31	FALSE
PRPF4B	FALSE
PRPF6	FALSE
PRPS1	FALSE
PRPS1L1	FALSE
PRPS2	FALSE
PRRC2A	FALSE
PRRC2C	FALSE
PSMC1	FALSE
PSMC3	FALSE
PSMD2	FALSE
PSMD3	FALSE
PSME1	FALSE
PSPC1	FALSE
PTBP3	FALSE
PTPN1	FALSE
PTPN6	FALSE
PTPRC	FALSE
PUF60	FALSE
PUM1	FALSE
PUM3	FALSE
PYCR1	FALSE
PYM1	FALSE
QARS1	FALSE
RAB10	FALSE
RAB11A	FALSE
RAB15	FALSE
RAB1B	FALSE
RAB1C	FALSE
RAB8A	FALSE
RAB8B	FALSE
RAC1	FALSE
RAC3	FALSE
RAD50	FALSE
RAI1	FALSE
RAN	FALSE
RANBP2	FALSE
RAP1A	FALSE
RAP1B	FALSE
RASAL3	FALSE
RAVER1	FALSE
RB1	FALSE
RBBP7	FALSE
RBM10	FALSE
RBM12B	FALSE
RBM22	FALSE
RBM26	FALSE
RBM27	FALSE
RBM28	FALSE
RBM3	FALSE
RBM34	FALSE
RBM4B	FALSE
RBM5	FALSE
RBMX2	FALSE
RBMXL1	FALSE
RCL1	FALSE
RDX	FALSE
REXO4	FALSE
RFC1	FALSE
RFC3	FALSE
RFC4	FALSE
RFC5	FALSE
RFTN1	FALSE
RIOX1	FALSE
RNF213	FALSE
RPF1	FALSE
RPF2	FALSE
RPL10A	FALSE
RPL11	FALSE
RPL12	FALSE
RPL13	FALSE
RPL13A	FALSE
RPL15	FALSE
RPL17	FALSE
RPL23	FALSE
RPL23A	FALSE
RPL24	FALSE
RPL26	FALSE
RPL27	FALSE
RPL3	FALSE
RPL30	FALSE
RPL38	FALSE
RPL4	FALSE
RPL5	FALSE
RPL6	FALSE
RPL7	FALSE
RPL7A	FALSE
RPL9	FALSE
RPLP0	FALSE
RPLP2	FALSE
RPN1	FALSE
RPN2	FALSE
RPRD2	FALSE
RPS10	FALSE
RPS11	FALSE
RPS12	FALSE
RPS13	FALSE
RPS14	FALSE
RPS15	FALSE
RPS15A	FALSE
RPS17	FALSE
RPS18	FALSE
RPS19	FALSE
RPS2	FALSE
RPS24	FALSE
RPS25	FALSE
RPS27A	FALSE
RPS3	FALSE
RPS3A	FALSE
RPS4X	FALSE
RPS5	FALSE
RPS6	FALSE
RPS7	FALSE
RPS8	FALSE
RPS9	FALSE
RPSA	FALSE
RRP1	FALSE
RRP12	FALSE
RRP15	FALSE
RRP1B	FALSE
RRP7A	FALSE
RRP8	FALSE
RRP9	FALSE
RRS1	FALSE
RSBN1	FALSE
RSL1D1	FALSE
RSL24D1	FALSE
RUVBL1	FALSE
SAMD9	FALSE
SARNP	FALSE
SARS1	FALSE
SCAF1	FALSE
SCYL1	FALSE
SCYL2	FALSE
SENP3	FALSE
SEPTIN1	FALSE
SEPTIN2	FALSE
SEPTIN6	FALSE
SEPTIN7	FALSE
SEPTIN9	FALSE
SERPINB9	FALSE
SET	FALSE
SF1	FALSE
SF3A1	FALSE
SF3B6	FALSE
SFXN1	FALSE
SH3KBP1	FALSE
SKIV2L	FALSE
SLC25A11	FALSE
SLC25A12	FALSE
SLC25A13	FALSE
SLC25A3	FALSE
SLC25A6	FALSE
SLC45A2	FALSE
SLIRP	FALSE
SLTM	FALSE
SMAP2	FALSE
SMARCA2	FALSE
SMARCC1	FALSE
SMC1A	FALSE
SMC3	FALSE
SMC4	FALSE
SMC6	FALSE
SMCHD1	FALSE
SMNDC1	FALSE
SMU1	FALSE
SNIP1	FALSE
SNRNP40	FALSE
SNRPB	FALSE
SNRPC	FALSE
SNRPD3	FALSE
SNRPF	FALSE
SNRPG	FALSE
SNRPN	FALSE
SNU13	FALSE
SP110	FALSE
SPTAN1	FALSE
SPTBN1	FALSE
SRBD1	FALSE
SRP68	FALSE
SRP72	FALSE
SRP9	FALSE
SRRM1	FALSE
SRSF11	FALSE
SRSF3	FALSE
SRSF4	FALSE
SRSF6	FALSE
SRSF9	FALSE
SSB	FALSE
STAU2	FALSE
STIP1	FALSE
STK10	FALSE
STOML2	FALSE
STRBP	FALSE
STT3A	FALSE
STT3B	FALSE
SURF6	FALSE
SUV39H1	FALSE
TAP1	FALSE
TARBP2	FALSE
TARS3	FALSE
TBC1D10B	FALSE
TCERG1	FALSE
TENT4B	FALSE
TFAM	FALSE
TFG	FALSE
TFRC	FALSE
THOC2	FALSE
TIAL1	FALSE
TLN1	FALSE
TMEM214	FALSE
TMPO	FALSE
TNFAIP2	FALSE
TNIK	FALSE
TOP2B	FALSE
TPI1	FALSE
TPR	FALSE
TRA2A	FALSE
TRAF1	FALSE
TRAP1	FALSE
TRIM25	FALSE
TRIM26	FALSE
TRIM28	FALSE
TRIP4	FALSE
TRMT2A	FALSE
TTC37	FALSE
TTF1	FALSE
TUBA1B	FALSE
TUBB4B	FALSE
TUBG1	FALSE
TUFM	FALSE
TXLNA	FALSE
UBA1	FALSE
UBAP2	FALSE
UBAP2L	FALSE
UBTF	FALSE
UFL1	FALSE
UPF3B	FALSE
UQCRC2	FALSE
USP36	FALSE
USP39	FALSE
USP7	FALSE
UTP15	FALSE
UTP18	FALSE
UTP23	FALSE
UTP4	FALSE
UTP6	FALSE
VASP	FALSE
VCP	FALSE
VDAC1	FALSE
VRK1	FALSE
WARS1	FALSE
WDR12	FALSE
WDR43	FALSE
WDR46	FALSE
WDR55	FALSE
WDR6	FALSE
WDR74	FALSE
WDR75	FALSE
XAB2	FALSE
XRCC6	FALSE
XRN1	FALSE
YARS1	FALSE
YLPM1	FALSE
YTHDC2	FALSE
YTHDF3	FALSE
YWHAQ	FALSE
ZCCHC17	FALSE
ZMYND11	FALSE
ZNF280C	FALSE
ZNF326	FALSE
ZNF512	FALSE
ZNF593	FALSE
ZNF598	FALSE
ZNF616	FALSE
ZNF668	FALSE
ZNF800	FALSE
