# Supplementary material for: Aberrant R-loop–mediated immune evasion, cellular communication, and metabolic reprogramming affect cancer progression: a single-cell analysis
Source: Mol Cancer. 2024 Jan 10;23:11. doi: 10.1186/s12943-023-01924-6 (PMC10777569; doi:10.1186/s12943-023-01924-6)
Supplement: Supplementary file 13 — Additional file 13: Table S3. Differential R-loop peaks. [file 12943_2023_1924_MOESM13_ESM.xlsx]

## Sheet: Test2_vs_Control2
Table S3. Differential R-loop peaks
Peak_Locus	GeneID	Gene_Name	Gene_type	Description	Peak_Classification	PeakWidth	PeakDirection	PeakGCSkew	Conc_Test2	Conc_Control2	log2FC	p-value	FDR
chr4:87981504-87983191	ENSG00000286618	AC131944.1	lncRNA	novel transcript, antisense to PKD2and SPP1	GeneBody,Terminator	1689	-	0	5.84	-0.42	6.25	8.27e-11	3.03e-06
chr10:69103922-69104712	ENSG00000122862	SRGN	protein_coding	serglycin [Source:HGNC Symbol;Acc:HGNC:9361]	Terminator	792	+	0.080292	5.65	-0.42	6.07	2.41e-10	4.41e-06
chr14:61567695-61568559	ENSG00000250548	LINC01303	lncRNA	long intergenic non-protein coding RNA 1303 [Source:HGNC Symbol;Acc:HGNC:50470]	Promoter,GeneBody	866	-	-0.0269058	0.55	4.38	-3.84	2.72e-05	0.332
chr7:54375175-54375636	ENSG00000231427	LINC01445	lncRNA	long intergenic non-protein coding RNA 1445 [Source:HGNC Symbol;Acc:HGNC:50771]	GeneBody	463	+	-0.465241	0.24	4.7	-4.46	4.15e-05	0.381
chr7:55979375-55979832	ENSG00000146729	NIPSNAP2	protein_coding	nipsnap homolog 2 [Source:HGNC Symbol;Acc:HGNC:4179]	GeneBody	459	+	-0.300493	2.4	5.31	-2.91	8.84e-05	0.517
chr3:108481761-108482337	ENSG00000144821	MYH15	protein_coding	myosin heavy chain 15 [Source:HGNC Symbol;Acc:HGNC:31073]	GeneBody	578	-	0.407692	3.39	5.48	-2.08	0.00011	0.517
chr1:204174632-204175404					Intergenic	774		0.434903	1.61	4.54	-2.93	0.000113	0.517
chr5:167299604-167300170	ENSG00000254297	AC091820.1	lncRNA	novel transcript	GeneBody	568	-	0.432836	-0.24	4.06	-4.3	0.000135	0.517
chr1:115469939-115471137					Intergenic	1200		-0.0280374	2.87	5.43	-2.56	0.000138	0.517
chrX:65932314-65933037					Intergenic	725		0.311178	3.14	5.29	-2.15	0.000141	0.517
chr1:242725473-242726010					Intergenic	539		0.0295359	-0.24	3.98	-4.21	0.00023	0.67
chr7:54785294-54785768	ENSG00000234707	AC074351.1	lncRNA	novel transcript	GeneBody	476	+	-0.0901639	3.42	5.66	-2.25	0.000234	0.67
chr12:34271604-34272819					Intergenic	1217		-0.451197	1.47	4.47	-3	0.00024	0.67
chr5:149904809-149905405	ENSG00000132915	PDE6A	protein_coding	phosphodiesterase 6A [Source:HGNC Symbol;Acc:HGNC:8785]	GeneBody	598	-	-0.519164	1.96	4.59	-2.63	0.000271	0.67
chr15:94753730-94759821					Intergenic	6093		-0.387387	2.89	5.03	-2.14	0.000274	0.67
chr3:181782755-181784221					Intergenic	1468		-0.0526316	4.01	-0.42	4.42	0.000343	0.7
chr3:98247593-98248300	ENSG00000251088	AC117473.1	lncRNA	novel transcript	GeneBody	709	+	-0.47181	2.04	4.61	-2.57	0.000361	0.7
chr19:52342694-52343482	ENSG00000269535	AC010320.5	lncRNA	novel transcript, antisense to ZNF480 and ZNF610	GeneBody	790	-	-0.193634	1.8	4.49	-2.69	0.000372	0.7
chr10:67750281-67751011					Intergenic	732		0.0803324	4.76	1.94	2.82	0.000377	0.7
chr1:235397791-235398609	ENSG00000285053	TBCE	protein_coding	tubulin folding cofactor E [Source:HGNC Symbol;Acc:HGNC:11582]	GeneBody	820	+	-0.0643275	2.98	4.96	-1.97	0.000381	0.7
chr3:108097703-108098415					Intergenic	714		0.0909091	2.44	4.91	-2.47	0.000422	0.737
chr20:47330564-47331725	ENSG00000101040	ZMYND8	protein_coding	zinc finger MYND-type containing 8 [Source:HGNC Symbol;Acc:HGNC:9397]	GeneBody	1163	-	0.251397	2.28	4.76	-2.47	0.00052	0.867
chr5:124970208-124971082					Intergenic	876		0.422111	0.72	4.01	-3.29	0.000557	0.889
chr11:100903938-100904661	ENSG00000165895	ARHGAP42	protein_coding	Rho GTPase activating protein 42 [Source:HGNC Symbol;Acc:HGNC:26545]	GeneBody	725	+	-0.305136	2.64	4.75	-2.1	0.000589	0.9
chr1:241154142-241154559	ENSG00000182901	RGS7	protein_coding	regulator of G protein signaling 7 [Source:HGNC Symbol;Acc:HGNC:10003]	GeneBody	419	-	0.336493	-0.24	3.79	-4.03	0.000649	0.915
chr20:50759214-50759864					Intergenic	652		0.0154799	1.12	4.16	-3.03	0.000652	0.915
chr8:140517113-140518488	ENSG00000104472	CHRAC1	protein_coding	chromatin accessibility complex subunit 1 [Source:HGNC Symbol;Acc:HGNC:13544]	Terminator	1377	+	-0.00807754	4.69	2.14	2.55	0.000673	0.915
chr19:58401003-58401545	ENSG00000268307	LINC02560	lncRNA	long intergenic non-protein coding RNA 2560 [Source:HGNC Symbol;Acc:HGNC:53600]	Terminator	544	+	0.0113636	1.57	4.33	-2.75	0.00075	0.963
chr5:1994098-1994983					Intergenic	887		0.433584	2.78	4.96	-2.17	0.000761	0.963
chr5:172168781-172170113	ENSG00000072786	STK10	protein_coding	serine/threonine kinase 10 [Source:HGNC Symbol;Acc:HGNC:11388]	GeneBody	1334	-	-0.0432277	2.9	4.96	-2.06	0.0008	0.979
chr3:159695416-159695994	ENSG00000283154	IQCJ-SCHIP1	protein_coding	IQCJ-SCHIP1 readthrough [Source:HGNC Symbol;Acc:HGNC:38842]	GeneBody	580	+	-0.330769	0.98	4.08	-3.1	0.000857	1
chr5:702956-704676					Intergenic	1722		-0.382353	3.94	5.8	-1.86	0.000895	1
chr8:74334507-74334901					Intergenic	396		-0.586957	0.76	3.96	-3.21	0.00091	1
chr9:125368652-125369148					Intergenic	498		0.103774	4.26	1.58	2.67	0.000969	1
chr19:55425673-55426501					Intergenic	830		0.0953678	5.19	3.29	1.91	0.000981	1
chr7:149705621-149706901					Intergenic	1282		-0.377152	2.33	4.52	-2.19	0.00105	1
chr20:40959305-40959758					Intergenic	455		0.558333	2.08	4.37	-2.29	0.00124	1
chr3:66197560-66198114	ENSG00000144741	SLC25A26	protein_coding	solute carrier family 25 member 26 [Source:HGNC Symbol;Acc:HGNC:20661]	GeneBody	556	+	0.5	-0.24	3.58	-3.82	0.00125	1
chr10:84336926-84337679	ENSG00000107771	CCSER2	protein_coding	coiled-coil serine rich protein 2 [Source:HGNC Symbol;Acc:HGNC:29197]	GeneBody	755	+	0.448052	1.31	4.13	-2.82	0.00128	1
chr8:6648818-6649574	ENSG00000249898	MCPH1-AS1	lncRNA	MCPH1 antisense RNA 1 [Source:HGNC Symbol;Acc:HGNC:51655]	GeneBody,Terminator	758	-	0.356322	1.42	4.14	-2.72	0.00128	1
chr15:80362849-80363442					Intergenic	595		0.267797	0.39	3.78	-3.39	0.00132	1
chr10:60323735-60324645	ENSG00000151150	ANK3	protein_coding	ankyrin 3 [Source:HGNC Symbol;Acc:HGNC:494]	GeneBody	912	-	0.206983	2.76	4.84	-2.08	0.00135	1
chr15:89566561-89567517	ENSG00000259713	AC013391.2	lncRNA	novel transcript	GeneBody	958	+	-0.348643	2.12	4.39	-2.28	0.00136	1
chr12:130754223-130754894					Intergenic	673		0.256983	1.97	4.39	-2.42	0.00138	1
chr1:241600652-241601402	ENSG00000054277	OPN3	protein_coding	opsin 3 [Source:HGNC Symbol;Acc:HGNC:14007]	GeneBody	752	-	0.193846	1.93	4.4	-2.46	0.00143	1
chr7:55065590-55066157	ENSG00000146648	EGFR	protein_coding	epidermal growth factor receptor [Source:HGNC Symbol;Acc:HGNC:3236]	GeneBody	569	+	0.0188679	4.04	5.59	-1.56	0.00146	1
chr1:156104447-156104888					Intergenic	443		-0.346614	0.17	3.67	-3.5	0.00149	1
chr10:17228880-17229992	ENSG00000026025	VIM	protein_coding	vimentin [Source:HGNC Symbol;Acc:HGNC:12692]	Promoter,GeneBody	1114	+	-0.155844	5.7	3.85	1.84	0.00161	1
chr1:51849244-51850465	ENSG00000078618	NRDC	protein_coding	nardilysin convertase [Source:HGNC Symbol;Acc:HGNC:7995]	GeneBody	1223	-	0.0439367	5	3.28	1.71	0.00162	1
chr20:63886-67326					Intergenic	3442		-0.885572	5.83	7.26	-1.44	0.00165	1
chr8:101611164-101612244	ENSG00000083307	GRHL2	protein_coding	grainyhead like transcription factor 2 [Source:HGNC Symbol;Acc:HGNC:2799]	GeneBody	1082	+	-0.264762	3.13	5	-1.86	0.00172	1
chr3:9151232-9151796	ENSG00000196220	SRGAP3	protein_coding	SLIT-ROBO Rho GTPase activating protein 3 [Source:HGNC Symbol;Acc:HGNC:19744]	GeneBody	566	-	0.324324	1.63	4.23	-2.6	0.00177	1
chr3:135919391-135919774					Intergenic	385		0.511364	1.47	4.07	-2.6	0.00194	1
chr16:50385773-50386378					Intergenic	607		-0.0947368	1.63	4.18	-2.56	0.00196	1
chr19:40937318-40938295					Intergenic	979		0.196617	1.67	4.28	-2.61	0.00199	1
chr4:40064916-40066662	ENSG00000078177	N4BP2	protein_coding	NEDD4 binding protein 2 [Source:HGNC Symbol;Acc:HGNC:29851]	GeneBody	1748	+	0.125964	3.14	5	-1.85	0.00199	1
chr19:43325221-43326411					Intergenic	1192		0.469965	3.1	5	-1.89	0.00202	1
chr3:108470705-108471636	ENSG00000144821	MYH15	protein_coding	myosin heavy chain 15 [Source:HGNC Symbol;Acc:HGNC:31073]	GeneBody	933	-	0.0506024	4.51	6.09	-1.58	0.00203	1
chr11:62841167-62842238	ENSG00000133316	WDR74	protein_coding	WD repeat domain 74 [Source:HGNC Symbol;Acc:HGNC:25529]	Promoter	1073	-	-0.0793037	3.41	5.08	-1.67	0.00205	1
chr3:106117215-106118128					Intergenic	915		0.0504587	4.12	5.64	-1.52	0.00224	1
chr5:117050948-117051657					Intergenic	711		0.447721	0.83	3.9	-3.07	0.00224	1
chr1:230885376-230885942	ENSG00000288037	AL118511.4	lncRNA	novel transcript	GeneBody	568	-	-0.276596	2.22	4.34	-2.12	0.00225	1
chr1:234077682-234078668	ENSG00000183780	SLC35F3	protein_coding	solute carrier family 35 member F3 [Source:HGNC Symbol;Acc:HGNC:23616]	GeneBody	988	+	-0.340471	2.76	4.68	-1.91	0.00235	1
chr2:200310787-200311568	ENSG00000196141	SPATS2L	protein_coding	spermatogenesis associated serine rich 2 like [Source:HGNC Symbol;Acc:HGNC:24574]	GeneBody	783	+	-0.0463576	-0.24	3.46	-3.7	0.00255	1
chr1:205989073-205990074	ENSG00000276600	RAB7B	protein_coding	RAB7B, member RAS oncogene family [Source:HGNC Symbol;Acc:HGNC:30513]	GeneBody	1003	-	-0.409894	2.74	4.89	-2.15	0.00255	1
chr17:6896535-6897865					Intergenic	1332		0.207921	2.25	4.57	-2.32	0.00258	1
chr21:10721538-10723990					Intergenic	2454		-0.808295	3.96	5.55	-1.59	0.00262	1
chr16:65698013-65698864					Intergenic	853		-0.0136986	3.82	0.79	3.03	0.00263	1
chr20:1828365-1829186					Intergenic	823		-0.196078	2.2	4.62	-2.41	0.00266	1
chr8:79807061-79807989	ENSG00000249328	AC036214.1	lncRNA	novel transcript	GeneBody	930	-	0.0786026	2.82	4.84	-2.02	0.00268	1
chr19:8106548-8108525	ENSG00000142449	FBN3	protein_coding	fibrillin 3 [Source:HGNC Symbol;Acc:HGNC:18794]	GeneBody	1979	-	0.696335	4.09	5.5	-1.41	0.00271	1
chr16:28572978-28573670	ENSG00000176476	SGF29	protein_coding	SAGA complex associated factor 29 [Source:HGNC Symbol;Acc:HGNC:25156]	GeneBody	694	+	0.194595	1.14	3.94	-2.8	0.00282	1
chr20:1416028-1416842					Intergenic	816		-0.221154	2.81	4.65	-1.84	0.00284	1
chr7:106660961-106661550	ENSG00000253276	CCDC71L	protein_coding	coiled-coil domain containing 71 like [Source:HGNC Symbol;Acc:HGNC:26685]	Promoter	591	-	0.0842697	2.19	4.39	-2.2	0.00285	1
chr2:48127412-48127988	ENSG00000230773	AC092650.1	lncRNA	novel transcript	GeneBody	578	-	0.465201	0.44	3.66	-3.21	0.00296	1
chr8:101098407-101099211					Intergenic	806		-0.410112	1.93	4.29	-2.36	0.00309	1
chr22:30459362-30460104	ENSG00000100012	SEC14L3	protein_coding	SEC14 like lipid binding 3 [Source:HGNC Symbol;Acc:HGNC:18655]	Terminator	744	-	-0.0637119	1.02	3.85	-2.83	0.0031	1
chr11:46482724-46483703	ENSG00000110497	AMBRA1	protein_coding	autophagy and beclin 1 regulator 1 [Source:HGNC Symbol;Acc:HGNC:25990]	GeneBody	981	-	0.068323	4.65	2.5	2.15	0.00312	1
chr9:63325561-63327130					Intergenic	1571		-0.240629	-0.24	3.34	-3.58	0.0033	1
chr10:3062223-3063525	ENSG00000273001	AL731533.2	lncRNA	novel transcript	Terminator	1304	-	-0.392569	2.64	4.52	-1.88	0.00344	1
chr10:54599717-54600443	ENSG00000150275	PCDH15	protein_coding	protocadherin related 15 [Source:HGNC Symbol;Acc:HGNC:14674]	GeneBody	728	-	0.5	2.28	4.48	-2.2	0.00347	1
chr10:44879736-44880622	ENSG00000224812	TMEM72-AS1	lncRNA	TMEM72 antisense RNA 1 [Source:HGNC Symbol;Acc:HGNC:27349]	GeneBody	888	-	-0.205589	3.08	4.91	-1.83	0.00349	1
chr14:102242454-102243704	ENSG00000080823	MOK	protein_coding	MOK protein kinase [Source:HGNC Symbol;Acc:HGNC:9833]	GeneBody	1252	-	-0.482394	3.8	5.23	-1.43	0.00358	1
chr6:168714433-168716133	ENSG00000235815	AL136099.1	lncRNA	novel transcript	Promoter	1702	+	0.922581	4.23	5.74	-1.51	0.00363	1
chr1:44073848-44074516	ENSG00000230615	AL139220.2	lncRNA	novel transcript	GeneBody	670	+	-0.495082	2.06	4.29	-2.23	0.00367	1
chr8:96177934-96178329					Intergenic	397		-0.026738	3.72	0.63	3.1	0.00383	1
chr8:125255682-125256453	ENSG00000156831	NSMCE2	protein_coding	NSE2 (MMS21) homolog, SMC5-SMC6 complex SUMO ligase [Source:HGNC Symbol;Acc:HGNC:26513]	GeneBody	773	+	0.268156	2.53	4.44	-1.91	0.00384	1
chr19:55008186-55009918	ENSG00000267265	AC011476.3	lncRNA	novel transcript, antisense to RDH13 and GP6	GeneBody	1734	+	0.406593	4.5	5.77	-1.26	0.00384	1
chr9:111662563-111663992	ENSG00000242616	GNG10	protein_coding	G protein subunit gamma 10 [Source:HGNC Symbol;Acc:HGNC:4402]	Promoter,GeneBody	1431	+	0.339286	3.31	4.98	-1.67	0.00396	1
chr20:838149-838777	ENSG00000125898	FAM110A	protein_coding	family with sequence similarity 110 member A [Source:HGNC Symbol;Acc:HGNC:16188]	GeneBody	630	+	0.229091	2.37	4.48	-2.11	0.00397	1
chr1:116175376-116175907					Intergenic	533		0.390947	1.54	4.12	-2.58	0.00401	1
chr5:1772321-1772927					Intergenic	608		0.0194805	-0.24	3.31	-3.55	0.0041	1
chrX:17772846-17773716					Intergenic	872		-0.519789	1.96	4.25	-2.29	0.00415	1
chr7:87209121-87209904	ENSG00000135185	TMEM243	protein_coding	transmembrane protein 243 [Source:HGNC Symbol;Acc:HGNC:21707]	GeneBody	785	-	0.536896	3.11	5.01	-1.89	0.00415	1
chr7:53632486-53632942					Intergenic	458		0.273632	3.58	5.1	-1.53	0.00432	1
chr19:5513178-5514064					Intergenic	888		0.144766	4.12	1.79	2.34	0.00458	1
chr5:6539011-6539605					Intergenic	596		0.598513	3.19	4.94	-1.75	0.00462	1
chr10:62844553-62845181					Intergenic	630		-0.242038	2.67	4.51	-1.84	0.00467	1
chr9:94937278-94938438	ENSG00000148120	AOPEP	protein_coding	aminopeptidase O (putative) [Source:HGNC Symbol;Acc:HGNC:1361]	GeneBody	1162	+	-0.176692	2.35	4.49	-2.13	0.00477	1
chr3:182168202-182169020					Intergenic	820		-0.329843	2.27	4.31	-2.04	0.00477	1
chr12:68370714-68371553					Intergenic	841		0.119804	2.63	4.54	-1.91	0.00477	1
chr14:68609931-68611019	ENSG00000287385	AL121820.3	lncRNA	novel transcript, antisense to RAD51B	Promoter,GeneBody,Terminator	1090	-	-0.343066	3.38	4.94	-1.56	0.00479	1
chr5:177547403-177547980	ENSG00000146067	FAM193B	protein_coding	family with sequence similarity 193 member B [Source:HGNC Symbol;Acc:HGNC:25524]	GeneBody	579	-	-0.0299003	0.11	3.39	-3.28	0.00483	1
chr11:74557123-74557842					Intergenic	721		0.152542	4.24	2.09	2.14	0.00485	1
chr17:26936067-26940962					Intergenic	4897		0.782707	4.84	6.11	-1.26	0.00485	1
chr1:203910526-203911267					Intergenic	743		-0.0919881	4.84	3.2	1.64	0.00488	1
chr9:71695193-71695713	ENSG00000135048	CEMIP2	protein_coding	cell migration inducing hyaluronidase 2 [Source:HGNC Symbol;Acc:HGNC:11869]	GeneBody	522	-	-0.122951	0.94	3.7	-2.76	0.00489	1
chr14:55701497-55702715					Intergenic	1220		0.258555	3.02	4.98	-1.97	0.00489	1
chr7:158091470-158091870	ENSG00000155093	PTPRN2	protein_coding	protein tyrosine phosphatase receptor type N2 [Source:HGNC Symbol;Acc:HGNC:9677]	GeneBody	402	-	0.771144	0.83	3.69	-2.86	0.00493	1
chr9:130971717-130972800					Intergenic	1085		-0.142349	3.04	4.79	-1.75	0.00499	1
chr1:209449463-209450508					Intergenic	1047		-0.333333	2.03	4.21	-2.18	0.00502	1
chr16:87013839-87014693					Intergenic	856		-0.815718	1.36	3.94	-2.58	0.00503	1
chr3:111593581-111594670	ENSG00000177494	ZBED2	protein_coding	zinc finger BED-type containing 2 [Source:HGNC Symbol;Acc:HGNC:20710]	Promoter,GeneBody,Terminator	1091	-	-0.195035	4.65	6.2	-1.55	0.0051	1
chr12:12595836-12596836					Intergenic	1002		0.320755	2.43	4.57	-2.14	0.00513	1
chr21:7955265-7957940					Intergenic	2677		-0.78348	5.29	6.61	-1.32	0.00527	1
chr2:45641878-45642282					Intergenic	406		0.326425	1.82	4.07	-2.24	0.00533	1
chr20:59721456-59722597	ENSG00000087495	PHACTR3	protein_coding	phosphatase and actin regulator 3 [Source:HGNC Symbol;Acc:HGNC:15833]	GeneBody	1143	+	0.254516	2.87	4.58	-1.71	0.00541	1
chr14:75891002-75891634	ENSG00000119685	TTLL5	protein_coding	tubulin tyrosine ligase like 5 [Source:HGNC Symbol;Acc:HGNC:19963]	GeneBody	634	+	-0.180556	2.34	4.56	-2.23	0.00549	1
chr1:241787261-241788206	ENSG00000162843	WDR64	protein_coding	WD repeat domain 64 [Source:HGNC Symbol;Acc:HGNC:26570]	GeneBody	947	+	0.0594059	4.77	3.09	1.68	0.00553	1
chr3:4249806-4250357					Intergenic	553		0.371841	1.95	4.11	-2.16	0.00556	1
chr20:33623562-33624453	ENSG00000078699	CBFA2T2	protein_coding	CBFA2/RUNX1 partner transcriptional co-repressor 2 [Source:HGNC Symbol;Acc:HGNC:1536]	GeneBody	893	+	-0.00653595	4	1.68	2.32	0.00562	1
chr12:53096979-53097553	ENSG00000167779	IGFBP6	protein_coding	insulin like growth factor binding protein 6 [Source:HGNC Symbol;Acc:HGNC:5475]	Promoter	576	+	-0.3625	2.39	4.44	-2.05	0.00563	1
chr20:57490960-57491688					Intergenic	730		0.132394	4.81	2.56	2.25	0.00568	1
chr22:36800392-36800880	ENSG00000100362	PVALB	protein_coding	parvalbumin [Source:HGNC Symbol;Acc:HGNC:9704]	Terminator	490	-	0.0376569	1.24	3.81	-2.57	0.00571	1
chr10:49629856-49630411	ENSG00000070748	CHAT	protein_coding	choline O-acetyltransferase [Source:HGNC Symbol;Acc:HGNC:1912]	GeneBody	557	+	0.360595	-0.24	3.26	-3.5	0.00572	1
chr7:98439533-98440185					Intergenic	654		-0.189189	1.96	4.18	-2.23	0.00575	1
chr9:127805344-127805802	ENSG00000136877	FPGS	protein_coding	folylpolyglutamate synthase [Source:HGNC Symbol;Acc:HGNC:3824]	GeneBody	460	+	0.125	3.21	0.02	3.19	0.00579	1
chr17:42681737-42682618	ENSG00000184451	CCR10	protein_coding	C-C motif chemokine receptor 10 [Source:HGNC Symbol;Acc:HGNC:4474]	Promoter,Terminator	883	-	0.0446429	2.99	4.65	-1.65	0.00599	1
chr1:202150693-202151144	ENSG00000143851	PTPN7	protein_coding	protein tyrosine phosphatase non-receptor type 7 [Source:HGNC Symbol;Acc:HGNC:9659]	GeneBody	453	-	-0.366255	0.24	3.46	-3.22	0.00618	1
chr11:67096797-67098141					Intergenic	1346		0.0114613	2.06	4.42	-2.35	0.00618	1
chr4:72287289-72287798	ENSG00000156140	ADAMTS3	protein_coding	ADAM metallopeptidase with thrombospondin type 1 motif 3 [Source:HGNC Symbol;Acc:HGNC:219]	GeneBody	511	-	0.518072	1.08	3.83	-2.75	0.00618	1
chr11:20545741-20546351					Intergenic	612		-0.36747	2.44	4.49	-2.05	0.00631	1
chr1:209561794-209562435	ENSG00000224260	AL023754.1	lncRNA	novel transcript	GeneBody	643	-	0.18541	1.55	3.89	-2.34	0.00641	1
chr2:47205009-47205849					Intergenic	842		0.267735	2.3	4.32	-2.02	0.00647	1
chrX:19542336-19543556	ENSG00000147010	SH3KBP1	protein_coding	SH3 domain containing kinase binding protein 1 [Source:HGNC Symbol;Acc:HGNC:13867]	GeneBody	1222	-	0.244444	0.84	3.7	-2.85	0.00648	1
chr3:185417536-185418670	ENSG00000073803	MAP3K13	protein_coding	mitogen-activated protein kinase kinase kinase 13 [Source:HGNC Symbol;Acc:HGNC:6852]	GeneBody	1136	+	-0.0471014	4.57	2.38	2.18	0.00648	1
chrX:141905920-141906646	ENSG00000155495	MAGEC1	protein_coding	MAGE family member C1 [Source:HGNC Symbol;Acc:HGNC:6812]	GeneBody	728	+	-0.291785	-0.24	3.11	-3.35	0.00666	1
chr17:49860977-49861650					Intergenic	675		-0.176152	2.73	4.47	-1.73	0.00671	1
chr16:24654178-24655083					Intergenic	907		-0.0432432	4	1.4	2.6	0.00672	1
chr11:14441445-14442632					Intergenic	1189		0.269091	3.12	4.72	-1.6	0.00673	1
chr10:53821985-53822530	ENSG00000150275	PCDH15	protein_coding	protocadherin related 15 [Source:HGNC Symbol;Acc:HGNC:14674]	GeneBody,Terminator	547	-	0.555556	2.61	4.41	-1.8	0.00683	1
chr14:31937875-31938598					Intergenic	725		0.0461538	0.17	3.46	-3.28	0.00687	1
chr1:145857850-145859197	ENSG00000131788	PIAS3	protein_coding	protein inhibitor of activated STAT 3 [Source:HGNC Symbol;Acc:HGNC:16861]	Promoter,GeneBody	1349	-	-0.269649	2.8	4.67	-1.87	0.00692	1
chr20:25212477-25213190	ENSG00000197586	ENTPD6	protein_coding	ectonucleoside triphosphate diphosphohydrolase 6 [Source:HGNC Symbol;Acc:HGNC:3368]	GeneBody	715	+	-0.0420168	1.88	4.02	-2.14	0.00694	1
chr19:414965-416021	ENSG00000129946	SHC2	protein_coding	SHC adaptor protein 2 [Source:HGNC Symbol;Acc:HGNC:29869]	Terminator	1058	-	0.558994	3.58	5.09	-1.51	0.00699	1
chr11:33064040-33064795	ENSG00000176148	TCP11L1	protein_coding	t-complex 11 like 1 [Source:HGNC Symbol;Acc:HGNC:25655]	GeneBody	757	+	-0.0110497	2.68	4.51	-1.84	0.00702	1
chr9:112866038-112868035	ENSG00000148158	SNX30	protein_coding	sorting nexin family member 30 [Source:HGNC Symbol;Acc:HGNC:23685]	GeneBody	1999	+	-0.431818	4.52	5.88	-1.36	0.00708	1
chr7:36131223-36131640					Intergenic	419		0.339535	0.76	3.54	-2.78	0.00715	1
chr5:16756640-16757472	ENSG00000145555	MYO10	protein_coding	myosin X [Source:HGNC Symbol;Acc:HGNC:7593]	GeneBody	834	-	-0.0146341	2.83	4.77	-1.94	0.00721	1
chr8:123272878-123273280	ENSG00000165156	ZHX1	protein_coding	zinc fingers and homeoboxes 1 [Source:HGNC Symbol;Acc:HGNC:12871]	GeneBody	404	-	-0.234286	1.86	4.09	-2.23	0.00727	1
chr20:1993989-1994610	ENSG00000101327	PDYN	protein_coding	prodynorphin [Source:HGNC Symbol;Acc:HGNC:8820]	Promoter,GeneBody	623	-	0.214502	2.56	4.36	-1.81	0.00729	1
chr5:80578837-80579641					Intergenic	806		0.545763	5.14	3.76	1.37	0.00735	1
chr20:13541784-13542267	ENSG00000089123	TASP1	protein_coding	taspase 1 [Source:HGNC Symbol;Acc:HGNC:15859]	GeneBody	485	-	0.0769231	3.73	1.21	2.52	0.00756	1
chr12:15590040-15590771	ENSG00000151490	PTPRO	protein_coding	protein tyrosine phosphatase receptor type O [Source:HGNC Symbol;Acc:HGNC:9678]	GeneBody	733	+	-0.217647	1.79	4.15	-2.36	0.00762	1
chr6:6992356-6992866	ENSG00000203498	AL139390.1	lncRNA	novel transcript	Promoter	512	+	0.0828729	3.97	1.81	2.15	0.00772	1
chr22:11064346-11066227	ENSG00000279973	CU104787.1	lncRNA	novel transcript	Promoter	1883	+	-0.537118	3.55	4.95	-1.4	0.00778	1
chr2:235714786-235715489	ENSG00000157985	AGAP1	protein_coding	ArfGAP with GTPase domain, ankyrin repeat and PH domain 1 [Source:HGNC Symbol;Acc:HGNC:16922]	GeneBody	705	+	-0.0506667	2.29	4.3	-2.01	0.00787	1
chr1:55332506-55333173					Intergenic	669		0.406977	1.83	4.07	-2.25	0.00787	1
chr3:9207967-9208452	ENSG00000196220	SRGAP3	protein_coding	SLIT-ROBO Rho GTPase activating protein 3 [Source:HGNC Symbol;Acc:HGNC:19744]	GeneBody	487	-	-0.276423	3.72	1.03	2.69	0.00788	1
chr20:61044871-61045862					Intergenic	993		-0.545064	3.25	4.86	-1.6	0.00791	1
chr2:184214355-184215009	ENSG00000286980	AC020584.1	lncRNA	novel transcript	GeneBody	656	+	-0.0763359	4.25	2.35	1.89	0.00809	1
chr11:114913564-114914013					Intergenic	451		0.258216	-0.24	3.26	-3.5	0.0082	1
chr11:63681575-63682277	ENSG00000133318	RTN3	protein_coding	reticulon 3 [Source:HGNC Symbol;Acc:HGNC:10469]	Promoter	704	+	0.2	2.33	4.3	-1.97	0.00834	1
chr2:223907849-223908614	ENSG00000085449	WDFY1	protein_coding	WD repeat and FYVE domain containing 1 [Source:HGNC Symbol;Acc:HGNC:20451]	GeneBody	767	-	-0.313514	2.47	4.33	-1.86	0.00836	1
chr20:34875243-34876623	ENSG00000131069	ACSS2	protein_coding	acyl-CoA synthetase short chain family member 2 [Source:HGNC Symbol;Acc:HGNC:15814]	Promoter	1382	+	-0.112882	3.93	5.35	-1.42	0.00838	1
chr9:97398442-97399231					Intergenic	791		-0.167883	3	4.6	-1.6	0.0084	1
chr6:27078698-27079284					Intergenic	588		0.00353357	0.39	3.35	-2.96	0.0084	1
chr9:20973176-20975055	ENSG00000188352	FOCAD	protein_coding	focadhesin [Source:HGNC Symbol;Acc:HGNC:23377]	GeneBody	1881	+	-0.395238	1.31	3.86	-2.56	0.00852	1
chr1:235157094-235158889	ENSG00000188739	RBM34	protein_coding	RNA binding motif protein 34 [Source:HGNC Symbol;Acc:HGNC:28965]	GeneBody	1797	-	0.223558	4.36	5.56	-1.2	0.00856	1
chr11:68490078-68490649	ENSG00000110075	PPP6R3	protein_coding	protein phosphatase 6 regulatory subunit 3 [Source:HGNC Symbol;Acc:HGNC:1173]	GeneBody	573	+	-0.0147783	4.38	2.54	1.84	0.00856	1
chr8:117858425-117858836	ENSG00000182197	EXT1	protein_coding	exostosin glycosyltransferase 1 [Source:HGNC Symbol;Acc:HGNC:3512]	GeneBody	413	-	0.37799	1.12	3.7	-2.58	0.00858	1
chr5:7263874-7264729					Intergenic	857		-0.331787	2.56	4.51	-1.94	0.00862	1
chr19:10479159-10480586					Intergenic	1429		-0.0971867	4.74	2.9	1.84	0.00865	1
chr3:146362702-146363616					Intergenic	916		-0.345291	2.37	4.24	-1.87	0.0088	1
chr2:121321875-121322745					Intergenic	872		0.112128	4.16	1.46	2.7	0.00883	1
chr9:108482751-108483396					Intergenic	647		0.169231	0.89	3.61	-2.72	0.00884	1
chr6:30915583-30916216	ENSG00000288473	AL669830.2	lncRNA	novel protein	GeneBody,Terminator	635	+	0.015015	1.7	3.92	-2.22	0.00897	1
chr2:64210638-64211577					Intergenic	941		-0.297778	2.97	4.57	-1.6	0.009	1
chr19:53878855-53880260	ENSG00000126583	PRKCG	protein_coding	protein kinase C gamma [Source:HGNC Symbol;Acc:HGNC:9402]	Promoter	1407	+	0.125	4.15	5.71	-1.56	0.00905	1
chr19:43783517-43786017					Intergenic	2502		0.0520059	4.68	5.92	-1.24	0.00908	1
chr14:52219323-52220258					Intergenic	937		-0.138211	4.7	3.17	1.53	0.00914	1
chr2:44944985-44945759	ENSG00000138083	SIX3	protein_coding	SIX homeobox 3 [Source:HGNC Symbol;Acc:HGNC:10889]	GeneBody,Terminator	776	+	-0.16041	4.45	2.73	1.72	0.00915	1
chr1:222263471-222264150	ENSG00000236230	AL356108.1	lncRNA	novel transcript	GeneBody	681	-	-0.498392	2.6	4.4	-1.8	0.0092	1
chr1:34572978-34573690					Intergenic	714		0.252125	2.82	4.57	-1.75	0.00936	1
chr1:113191465-113192358					Intergenic	895		0.187368	3.5	5.24	-1.74	0.00938	1
chr14:45715203-45715870	ENSG00000258616	LINC02303	lncRNA	long intergenic non-protein coding RNA 2303 [Source:HGNC Symbol;Acc:HGNC:53222]	Promoter	669	-	-0.217687	0.76	3.47	-2.71	0.0094	1
chr9:133123511-133124558	ENSG00000285245	AL162417.1	protein_coding	novel protein	GeneBody	1049	-	-0.161793	3.28	4.77	-1.49	0.00944	1
chr3:160026887-160028050	ENSG00000242107	LINC01100	lncRNA	long intergenic non-protein coding RNA 1100 [Source:HGNC Symbol;Acc:HGNC:49224]	GeneBody	1165	+	0.316637	2.61	4.49	-1.87	0.00946	1
chr3:146164953-146165634					Intergenic	683		0.38255	2.08	4.34	-2.26	0.00958	1
chr3:146430806-146431204					Intergenic	400		-0.233831	1.33	3.8	-2.47	0.00963	1
chr5:150161090-150162010					Intergenic	922		0.131429	2.51	4.43	-1.92	0.00974	1
chr7:54745940-54747755					Intergenic	1817		-0.432658	5.33	6.5	-1.17	0.00987	1
chr4:37686315-37686991	ENSG00000181826	RELL1	protein_coding	RELT like 1 [Source:HGNC Symbol;Acc:HGNC:27379]	Promoter	678	-	-0.222904	2.14	4.29	-2.14	0.00993	1
chr3:134665466-134666278					Intergenic	814		0.2	3.45	4.96	-1.5	0.00993	1
chr10:93118983-93119563					Intergenic	582		-0.0273973	4.03	1.74	2.29	0.01	1
chr22:36484915-36485646	ENSG00000100350	FOXRED2	protein_coding	FAD dependent oxidoreductase domain containing 2 [Source:HGNC Symbol;Acc:HGNC:26264]	Terminator	733	-	-0.211429	3.94	1.69	2.25	0.0101	1
chr5:57173703-57174363	ENSG00000062194	GPBP1	protein_coding	GC-rich promoter binding protein 1 [Source:HGNC Symbol;Acc:HGNC:29520]	Promoter	662	+	-0.0383747	2.66	4.58	-1.93	0.0101	1
chr1:182822249-182822733	ENSG00000135838	NPL	protein_coding	N-acetylneuraminate pyruvate lyase [Source:HGNC Symbol;Acc:HGNC:16781]	GeneBody	486	+	-0.038835	0.5	3.35	-2.85	0.0103	1
chr2:1587135-1588369	ENSG00000228613	AC141930.1	lncRNA	novel transcript	GeneBody	1236	-	-0.428571	2.84	4.55	-1.71	0.0103	1
chr3:155274741-155276088					Intergenic	1349		0.365025	3.12	4.7	-1.57	0.0104	1
chr7:147636663-147637410	ENSG00000174469	CNTNAP2	protein_coding	contactin associated protein 2 [Source:HGNC Symbol;Acc:HGNC:13830]	GeneBody	749	+	0.327635	2.2	4.11	-1.91	0.0105	1
chr11:71414687-71415300					Intergenic	615		0.818182	2.35	4.26	-1.9	0.0106	1
chr6:151474575-151475094					Intergenic	521		-0.138462	3.68	1.27	2.42	0.0106	1
chr13:27195332-27195832	ENSG00000275294	LINC02340	lncRNA	long intergenic non-protein coding RNA 2340 [Source:HGNC Symbol;Acc:HGNC:53260]	GeneBody	502	-	0.283333	0.8	3.73	-2.93	0.0106	1
chr3:13088022-13088999					Intergenic	979		-0.24774	3.16	4.65	-1.48	0.0106	1
chr1:248702659-248703648	ENSG00000286015	CR589904.2	protein_coding	novel protein	GeneBody	991	-	-0.564444	3.75	5.25	-1.51	0.0108	1
chr3:116470236-116470694					Intergenic	460		-0.104478	1.17	3.6	-2.43	0.0108	1
chr6:36146552-36147646					Intergenic	1096		-0.305302	2.46	4.37	-1.91	0.0108	1
chr12:25133944-25134644	ENSG00000118307	CASC1	protein_coding	cancer susceptibility 1 [Source:HGNC Symbol;Acc:HGNC:29599]	GeneBody	702	-	-0.103659	4.03	1.62	2.41	0.0108	1
chr11:17750829-17751596	ENSG00000129159	KCNC1	protein_coding	potassium voltage-gated channel subfamily C member 1 [Source:HGNC Symbol;Acc:HGNC:6233]	GeneBody	769	+	0.214092	1.67	4.03	-2.36	0.011	1
chr22:46316537-46317219	ENSG00000075218	GTSE1	protein_coding	G2 and S-phase expressed 1 [Source:HGNC Symbol;Acc:HGNC:13698]	GeneBody	684	+	-0.0769231	4.65	3.17	1.47	0.011	1
chr12:52846097-52846941	ENSG00000170423	KRT78	protein_coding	keratin 78 [Source:HGNC Symbol;Acc:HGNC:28926]	GeneBody	846	-	-0.297645	2.69	4.52	-1.82	0.0111	1
chrX:123656155-123657675	ENSG00000125676	THOC2	protein_coding	THO complex 2 [Source:HGNC Symbol;Acc:HGNC:19073]	GeneBody	1522	-	0.145482	4.47	2.8	1.67	0.0111	1
chr1:36195932-36196497					Intergenic	567		-0.0592885	4.11	2.12	1.99	0.0113	1
chr14:75564757-75565745					Intergenic	990		-0.245059	3.31	4.93	-1.63	0.0113	1
chr2:219408130-219408632					Intergenic	504		0.140893	1.34	3.84	-2.51	0.0114	1
chr1:31545534-31546721					Intergenic	1189		-0.6337	2.58	4.36	-1.78	0.0115	1
chr11:63528579-63530431					Intergenic	1854		0.17037	-0.24	3.05	-3.29	0.0115	1
chr19:17921321-17921920					Intergenic	601		0.0915751	4.68	3.19	1.49	0.0115	1
chr6:142016487-142017351					Intergenic	866		-0.491841	1.49	3.87	-2.38	0.0116	1
chr2:96758109-96758777					Intergenic	670		-0.0507463	4.37	2.38	2	0.0116	1
chr2:21427506-21428212					Intergenic	708		-0.351351	1.67	3.94	-2.27	0.0117	1
chr14:103514389-103515277					Intergenic	890		0.126437	4.28	2.05	2.23	0.0118	1
chr5:174493252-174493828	ENSG00000249306	LINC01411	lncRNA	long intergenic non-protein coding RNA 1411 [Source:HGNC Symbol;Acc:HGNC:50703]	GeneBody	578	+	0.171429	0.11	3.06	-2.95	0.0119	1
chr3:114454378-114455040	ENSG00000242290	ZBTB20-AS5	lncRNA	ZBTB20 antisense RNA 5 [Source:HGNC Symbol;Acc:HGNC:52841]	GeneBody	664	+	-0.175	1.49	3.89	-2.4	0.0119	1
chr1:28550549-28551283	ENSG00000180098	TRNAU1AP	protein_coding	tRNA selenocysteine 1 associated protein 1 [Source:HGNC Symbol;Acc:HGNC:30813]	Promoter	736	+	0.077381	4.41	2.59	1.82	0.0119	1
chr10:45416390-45417150	ENSG00000012779	ALOX5	protein_coding	arachidonate 5-lipoxygenase [Source:HGNC Symbol;Acc:HGNC:435]	GeneBody	762	+	0.429348	3.51	5	-1.5	0.012	1
chr11:70811409-70812008					Intergenic	601		-0.735294	1.73	4	-2.27	0.012	1
chr12:14240302-14241329					Intergenic	1029		-0.171717	3.81	5.12	-1.31	0.012	1
chrX:136909650-136910713					Intergenic	1065		-0.355172	4.35	5.52	-1.18	0.012	1
chr17:36920474-36921301					Intergenic	829		-0.136564	2.11	4.17	-2.06	0.012	1
chr17:79664743-79665417					Intergenic	676		-0.12381	2.37	4.16	-1.79	0.0121	1
chr7:158780918-158782827	ENSG00000117868	ESYT2	protein_coding	extended synaptotagmin 2 [Source:HGNC Symbol;Acc:HGNC:22211]	GeneBody	1911	-	0.630086	4.79	5.93	-1.14	0.0121	1
chr18:79563822-79564392					Intergenic	572		0.656442	3.53	0.61	2.93	0.0122	1
chr5:43136179-43136655	ENSG00000172262	ZNF131	protein_coding	zinc finger protein 131 [Source:HGNC Symbol;Acc:HGNC:12915]	GeneBody	478	+	-0.00571429	4.83	3.15	1.67	0.0123	1
chr8:128559366-128560401					Intergenic	1037		-0.175781	4.99	3.51	1.48	0.0124	1
chr9:106860661-106861209	ENSG00000148143	ZNF462	protein_coding	zinc finger protein 462 [Source:HGNC Symbol;Acc:HGNC:21684]	Promoter	550	+	-0.0996785	1.9	3.98	-2.09	0.0124	1
chr3:111995147-111995628	ENSG00000144827	ABHD10	protein_coding	abhydrolase domain containing 10 [Source:HGNC Symbol;Acc:HGNC:25656]	Terminator	483	+	-0.294118	3.27	4.94	-1.67	0.0124	1
chr3:109065051-109065768	ENSG00000114487	MORC1	protein_coding	MORC family CW-type zinc finger 1 [Source:HGNC Symbol;Acc:HGNC:7198]	GeneBody	719	-	-0.302013	3.53	5.15	-1.62	0.0126	1
chr5:154287277-154287858	ENSG00000164574	GALNT10	protein_coding	polypeptide N-acetylgalactosaminyltransferase 10 [Source:HGNC Symbol;Acc:HGNC:19873]	GeneBody	583	+	-0.278008	1.44	3.69	-2.25	0.0126	1
chrX:107651266-107652275	ENSG00000147224	PRPS1	protein_coding	phosphoribosyl pyrophosphate synthetase 1 [Source:HGNC Symbol;Acc:HGNC:9462]	Terminator	1011	+	-0.0884354	2.93	4.61	-1.68	0.0127	1
chr5:6281164-6282234					Intergenic	1072		-0.055336	3.27	4.71	-1.44	0.0128	1
chr3:195201674-195202534	ENSG00000173950	XXYLT1	protein_coding	xyloside xylosyltransferase 1 [Source:HGNC Symbol;Acc:HGNC:26639]	GeneBody	862	-	-0.041769	4.08	2.07	2.01	0.0128	1
chr17:5502524-5503498	ENSG00000286190	AC055839.2	protein_coding	uncharacterized LOC728392 [Source:NCBI gene;Acc:728392]	Promoter	976	-	0.613588	3.87	5.17	-1.3	0.0129	1
chr3:139183958-139184643	ENSG00000175110	MRPS22	protein_coding	mitochondrial ribosomal protein S22 [Source:HGNC Symbol;Acc:HGNC:14508]	GeneBody	687	+	0.391045	2.47	4.26	-1.8	0.0129	1
chr2:190366035-190366840	ENSG00000151689	INPP1	protein_coding	inositol polyphosphate-1-phosphatase [Source:HGNC Symbol;Acc:HGNC:6071]	GeneBody	807	+	-0.395	2.65	4.44	-1.79	0.0129	1
chr20:36270151-36270523					Intergenic	374		-0.129944	3.51	0.85	2.66	0.0132	1
chr7:48225002-48226431	ENSG00000179869	ABCA13	protein_coding	ATP binding cassette subfamily A member 13 [Source:HGNC Symbol;Acc:HGNC:14638]	GeneBody	1431	+	0.0903226	3.69	5	-1.31	0.0132	1
chr5:26933465-26934085	ENSG00000113100	CDH9	protein_coding	cadherin 9 [Source:HGNC Symbol;Acc:HGNC:1768]	GeneBody	622	-	0.0522388	4.38	2.67	1.71	0.0132	1
chr9:93210738-93211856	ENSG00000165238	WNK2	protein_coding	WNK lysine deficient protein kinase 2 [Source:HGNC Symbol;Acc:HGNC:14542]	GeneBody	1120	+	-0.734345	3.63	4.96	-1.33	0.0133	1
chr12:13525148-13526752					Intergenic	1606		0.66005	4.56	5.67	-1.11	0.0133	1
chr2:7038527-7039586	ENSG00000151692	RNF144A	protein_coding	ring finger protein 144A [Source:HGNC Symbol;Acc:HGNC:20457]	GeneBody	1061	+	0.924686	1.92	4.03	-2.11	0.0134	1
chr20:46344694-46345316					Intergenic	624		-0.560976	2.59	4.28	-1.7	0.0135	1
chr12:124438340-124440304	ENSG00000196498	NCOR2	protein_coding	nuclear receptor corepressor 2 [Source:HGNC Symbol;Acc:HGNC:7673]	GeneBody	1966	-	0.229694	4.49	5.75	-1.26	0.0135	1
chr5:95915381-95916185	ENSG00000118985	ELL2	protein_coding	elongation factor for RNA polymerase II 2 [Source:HGNC Symbol;Acc:HGNC:17064]	GeneBody	806	-	0.259887	1.77	3.88	-2.11	0.0135	1
chr16:67401761-67402652	ENSG00000159714	ZDHHC1	protein_coding	zinc finger DHHC-type containing 1 [Source:HGNC Symbol;Acc:HGNC:17916]	GeneBody	893	-	-0.318182	1.92	4.11	-2.2	0.0138	1
chr15:90009475-90010029	ENSG00000140548	ZNF710	protein_coding	zinc finger protein 710 [Source:HGNC Symbol;Acc:HGNC:25352]	GeneBody	556	+	-0.445161	1.33	3.76	-2.43	0.0138	1
chr5:154597930-154598694					Intergenic	766		0.365994	2.09	4.14	-2.05	0.0138	1
chr1:93779939-93780611					Intergenic	674		-0.298701	1.96	4.13	-2.17	0.014	1
chrX:119236829-119237987	ENSG00000101856	PGRMC1	protein_coding	progesterone receptor membrane component 1 [Source:HGNC Symbol;Acc:HGNC:16090]	Promoter,GeneBody	1160	+	0.423077	3.34	4.84	-1.5	0.0141	1
chr12:32146526-32147226	ENSG00000151746	BICD1	protein_coding	BICD cargo adaptor 1 [Source:HGNC Symbol;Acc:HGNC:1049]	GeneBody	702	+	-0.2	3.39	4.72	-1.33	0.0141	1
chr14:77071713-77072698	ENSG00000258473	AC007686.2	lncRNA	novel transcript	GeneBody	987	-	-0.0507099	3.81	5.08	-1.27	0.0142	1
chr20:31234233-31235336					Intergenic	1105		0.608295	2.71	4.53	-1.82	0.0142	1
chr10:95583686-95584281					Intergenic	597		0.12	1.29	3.6	-2.32	0.0142	1
chrX:72182788-72183495	ENSG00000102309	PIN4	protein_coding	peptidylprolyl cis/trans isomerase, NIMA-interacting 4 [Source:HGNC Symbol;Acc:HGNC:8992]	GeneBody	709	+	0.485531	0.5	3.33	-2.83	0.0142	1
chr10:73806454-73807232	ENSG00000272916	AC022400.7	protein_coding	novel transcript	GeneBody	780	-	0.027027	2.64	4.27	-1.63	0.0143	1
chr9:115938919-115939362					Intergenic	445		-0.406977	0.39	3.17	-2.78	0.0145	1
chr8:144019879-144021010	ENSG00000186583	SPATC1	protein_coding	spermatogenesis and centriole associated 1 [Source:HGNC Symbol;Acc:HGNC:30510]	GeneBody	1133	+	-0.521168	2.94	4.81	-1.87	0.0145	1
chr7:2514487-2515395					Intergenic	910		-0.6614	2.52	4.4	-1.88	0.0145	1
chr19:43802792-43803242	ENSG00000159871	LYPD5	protein_coding	LY6/PLAUR domain containing 5 [Source:HGNC Symbol;Acc:HGNC:26397]	Promoter	452	-	-0.0707965	1.29	3.71	-2.43	0.0145	1
chr20:1391414-1391887	ENSG00000274322	AL136531.2	protein_coding	novel protein	GeneBody	475	-	0.158333	1.78	3.9	-2.12	0.0146	1
chr9:34050645-34051394	ENSG00000137073	UBAP2	protein_coding	ubiquitin associated protein 2 [Source:HGNC Symbol;Acc:HGNC:14185]	Promoter	751	-	0.0761421	1.12	3.57	-2.44	0.0146	1
chr3:134640868-134641423	ENSG00000174611	KY	protein_coding	kyphoscoliosis peptidase [Source:HGNC Symbol;Acc:HGNC:26576]	GeneBody	557	-	-0.253623	1.65	3.91	-2.26	0.0147	1
chr3:108357015-108357383	ENSG00000114455	HHLA2	protein_coding	HERV-H LTR-associating 2 [Source:HGNC Symbol;Acc:HGNC:4905]	GeneBody	370	+	0.21547	2.8	4.57	-1.77	0.0147	1
chr5:43331723-43333143					Intergenic	1422		0.386905	3.6	5.03	-1.42	0.0147	1
chr2:61575010-61575592					Intergenic	584		-0.263538	0.44	3.26	-2.82	0.0148	1
chr7:98584826-98585541					Intergenic	717		-0.638298	4.63	3.11	1.52	0.0148	1
chr19:56594293-56596675	ENSG00000197951	ZNF71	protein_coding	zinc finger protein 71 [Source:HGNC Symbol;Acc:HGNC:13141]	Promoter,GeneBody	2384	+	-0.0528634	5.33	6.45	-1.12	0.0151	1
chr22:25274978-25275872					Intergenic	896		0.228501	2.11	4.04	-1.94	0.0153	1
chr9:125236663-125237125	ENSG00000044574	HSPA5	protein_coding	heat shock protein family A (Hsp70) member 5 [Source:HGNC Symbol;Acc:HGNC:5238]	GeneBody	464	-	-0.1875	4.34	2.6	1.74	0.0154	1
chr1:152167751-152168414					Intergenic	665		0.00934579	1.82	4.01	-2.19	0.0154	1
chr6:10347154-10348483					Intergenic	1331		0.217391	2.67	4.49	-1.82	0.0154	1
chr13:50221292-50221814					Intergenic	524		0.368852	-0.24	3.01	-3.25	0.0155	1
chr22:21898436-21900083					Intergenic	1649		-0.0192926	5.25	4.02	1.22	0.0158	1
chr20:9004361-9004994					Intergenic	635		-0.20678	2.59	4.27	-1.67	0.0159	1
chr21:10719755-10721272					Intergenic	1519		-0.856925	2.97	4.77	-1.8	0.0159	1
chr8:135238696-135240662	ENSG00000254083	LINC01591	lncRNA	long intergenic non-protein coding RNA 1591 [Source:HGNC Symbol;Acc:HGNC:27819]	GeneBody	1968	+	0.200963	5.24	4.02	1.22	0.0159	1
chrX:65666814-65667638	ENSG00000147065	MSN	protein_coding	moesin [Source:HGNC Symbol;Acc:HGNC:7373]	Promoter	826	+	0.347193	3.18	4.79	-1.61	0.0159	1
chr7:55462386-55463011					Intergenic	627		-0.146067	5.73	4.3	1.44	0.016	1
chr19:42191163-42192203					Intergenic	1042		0.0140281	3.02	4.65	-1.63	0.016	1
chr6:151683280-151684505					Intergenic	1227		0.189381	3.11	4.74	-1.63	0.016	1
chr22:30210014-30210776					Intergenic	764		0.238739	2.79	4.49	-1.7	0.0161	1
chr2:216232011-216232584					Intergenic	575		0.0311111	4.25	2.65	1.6	0.0162	1
chr12:3494469-3495442	ENSG00000111218	PRMT8	protein_coding	protein arginine methyltransferase 8 [Source:HGNC Symbol;Acc:HGNC:5188]	Promoter,GeneBody	975	+	-0.102296	2.57	4.3	-1.73	0.0163	1
chr16:89107431-89107968	ENSG00000176715	ACSF3	protein_coding	acyl-CoA synthetase family member 3 [Source:HGNC Symbol;Acc:HGNC:27288]	GeneBody	539	+	-0.0610687	1.46	3.7	-2.24	0.0164	1
chr22:21886348-21887443					Intergenic	1097		-0.0209524	4.75	3.26	1.49	0.0164	1
chr1:26310557-26311284	ENSG00000158062	UBXN11	protein_coding	UBX domain protein 11 [Source:HGNC Symbol;Acc:HGNC:30600]	GeneBody	729	-	0.0457143	1.76	3.84	-2.08	0.0164	1
chr7:36116526-36117018					Intergenic	494		-0.108434	1.33	3.67	-2.34	0.0165	1
chr9:95737231-95738070					Intergenic	841		-0.101952	4.58	3	1.58	0.0165	1
chr10:110487460-110487827	ENSG00000273143	AL355512.1	lncRNA	novel transcript	GeneBody	369	-	-0.151832	1.09	3.48	-2.39	0.0166	1
chr1:153515765-153517038					Intergenic	1275		-0.123529	2.11	4.13	-2.02	0.0166	1
chr19:43392012-43393168					Intergenic	1158		0.298429	3.04	4.66	-1.63	0.0168	1
chr20:25761537-25762219					Intergenic	684		0.699659	2.77	4.56	-1.79	0.017	1
chr1:181013200-181013760	ENSG00000135823	STX6	protein_coding	syntaxin 6 [Source:HGNC Symbol;Acc:HGNC:11441]	GeneBody	562	-	-0.0901961	0.63	3.34	-2.72	0.017	1
chr14:55741341-55741848					Intergenic	509		-0.325758	2.64	4.27	-1.63	0.017	1
chr9:91401868-91402614					Intergenic	748		-0.206061	4.38	2.77	1.61	0.017	1
chr11:3904746-3905562	ENSG00000167323	STIM1	protein_coding	stromal interaction molecule 1 [Source:HGNC Symbol;Acc:HGNC:11386]	GeneBody	818	+	0.487871	2.63	4.38	-1.75	0.0171	1
chrX:118164882-118165393					Intergenic	513		0.0886076	1.94	3.96	-2.02	0.0172	1
chr16:56281332-56281845	ENSG00000287866	AC009102.4	lncRNA	novel transcript, antisense to GNAO1	GeneBody,Terminator	515	-	-0.457143	3.02	4.65	-1.64	0.0172	1
chr7:100135801-100136437	ENSG00000235077	AC073842.1	lncRNA	novel transcript	GeneBody	638	+	-0.0696203	0.84	3.35	-2.51	0.0172	1
chr1:116730856-116732690					Intergenic	1836		-0.192037	4.85	5.92	-1.08	0.0172	1
chr14:64867507-64868547	ENSG00000070182	SPTB	protein_coding	spectrin beta, erythrocytic [Source:HGNC Symbol;Acc:HGNC:11274]	GeneBody	1042	-	0.26971	3.52	4.8	-1.28	0.0173	1
chr16:15613361-15614688	ENSG00000166783	MARF1	protein_coding	meiosis regulator and mRNA stability factor 1 [Source:HGNC Symbol;Acc:HGNC:29562]	GeneBody	1329	-	0.125972	3.79	5.05	-1.26	0.0173	1
chr19:16042971-16044138	ENSG00000167459	LINC00905	lncRNA	long intergenic non-protein coding RNA 905 [Source:HGNC Symbol;Acc:HGNC:26334]	Terminator	1169	+	0.696246	3.26	4.68	-1.42	0.0174	1
chr10:71857856-71858760					Intergenic	906		-0.147752	2.52	4.45	-1.93	0.0174	1
chr19:50168991-50170123					Intergenic	1134		-0.416413	4.48	5.58	-1.11	0.0175	1
chrX:63424172-63424860	ENSG00000235437	LINC01278	lncRNA	long intergenic non-protein coding RNA 1278 [Source:HGNC Symbol;Acc:HGNC:28090]	Terminator	690	-	0.189349	3.23	4.62	-1.39	0.0176	1
chr7:55132800-55133843	ENSG00000146648	EGFR	protein_coding	epidermal growth factor receptor [Source:HGNC Symbol;Acc:HGNC:3236]	GeneBody	1045	+	0.0275862	4.4	5.79	-1.39	0.0176	1
chr4:87891866-87893950					Intergenic	2086		0.0910952	5.83	4.78	1.05	0.0177	1
chr14:31461369-31461953					Intergenic	586		0.308824	3.02	4.47	-1.45	0.0177	1
chr5:3583893-3585432					Intergenic	1541		0.55774	4.94	6.1	-1.15	0.0178	1
chr19:57499306-57500581	ENSG00000268107	AC003005.1	protein_coding	novel transcript	Promoter,GeneBody	1277	+	-0.170068	3.28	4.71	-1.44	0.018	1
chr2:231380753-231381922					Intergenic	1171		-0.719512	3.53	4.9	-1.37	0.0182	1
chr2:78758913-78759797					Intergenic	886		-0.429245	2.66	4.35	-1.69	0.0182	1
chr2:9760816-9761385	ENSG00000243491	AC082651.3	lncRNA	novel transcript	GeneBody	571	-	0.411765	1.17	3.57	-2.39	0.0182	1
chr9:129166925-129167896					Intergenic	973		-0.09375	3.14	4.55	-1.41	0.0183	1
chr6:43702652-43703172					Intergenic	522		0.141914	2.17	4.02	-1.85	0.0183	1
chr3:194794776-194795405					Intergenic	631		-0.0676157	4.07	1.96	2.11	0.0183	1
chr19:17926564-17927813					Intergenic	1251		0.155477	4.22	1.96	2.27	0.0184	1
chr11:64702827-64703297	ENSG00000110076	NRXN2	protein_coding	neurexin 2 [Source:HGNC Symbol;Acc:HGNC:8009]	GeneBody	472	-	-0.0344828	4.69	3.29	1.4	0.0184	1
chr13:109704719-109705408	ENSG00000285534	AL163541.1	lncRNA	novel transcript	GeneBody	691	-	0.0942249	0.39	3.31	-2.92	0.0184	1
chr3:187227939-187228758					Intergenic	821		-0.210256	3	4.55	-1.55	0.0185	1
chr12:25435644-25436368					Intergenic	726		-0.136842	4.34	2.63	1.71	0.0186	1
chr7:5526888-5529405	ENSG00000075624	ACTB	protein_coding	actin beta [Source:HGNC Symbol;Acc:HGNC:132]	GeneBody,Terminator	2519	-	0.0283224	7.54	6.59	0.96	0.0186	1
chr7:100168748-100169385	ENSG00000197093	GAL3ST4	protein_coding	galactose-3-O-sulfotransferase 4 [Source:HGNC Symbol;Acc:HGNC:24145]	Promoter,Terminator	639	-	0.0679012	3.81	1.66	2.15	0.0186	1
chr20:4023803-4024831					Intergenic	1030		-0.0985915	6.2	5.13	1.06	0.0187	1
chr19:53022952-53023905					Intergenic	955		-0.0263789	5.17	3.8	1.37	0.0188	1
chr12:108021499-108022807					Intergenic	1310		-0.348387	3.57	4.96	-1.39	0.0188	1
chr22:37344800-37345566	ENSG00000243902	FP325335.1	lncRNA	novel transcript	GeneBody	768	-	-0.294643	4.18	2.25	1.93	0.0188	1
chr15:91241094-91241964	ENSG00000185518	SV2B	protein_coding	synaptic vesicle glycoprotein 2B [Source:HGNC Symbol;Acc:HGNC:16874]	GeneBody	872	+	-0.396419	2.23	4.1	-1.88	0.0188	1
chr11:76667994-76668848	ENSG00000137507	LRRC32	protein_coding	leucine rich repeat containing 32 [Source:HGNC Symbol;Acc:HGNC:4161]	GeneBody	856	-	-0.267416	2.24	4.13	-1.89	0.0188	1
chr6:138464875-138465731	ENSG00000135540	NHSL1	protein_coding	NHS like 1 [Source:HGNC Symbol;Acc:HGNC:21021]	GeneBody	858	-	-0.340909	3.55	4.82	-1.27	0.0188	1
chr16:23513445-23513983					Intergenic	540		0.0677291	4.49	3.08	1.41	0.0189	1
chr1:159913595-159914822					Intergenic	1229		-0.139647	3.61	4.95	-1.34	0.0189	1
chr2:174532576-174533346					Intergenic	772		-0.142045	4.73	3.38	1.34	0.0189	1
chr9:118490035-118490788					Intergenic	755		0.4	1.49	3.72	-2.23	0.019	1
chr7:101249461-101250564					Intergenic	1105		0.0980392	4.22	2.34	1.88	0.019	1
chr11:44541807-44543008					Intergenic	1203		-0.159091	3.92	5.06	-1.14	0.019	1
chr14:42845271-42845903					Intergenic	634		-0.162562	4.03	2.19	1.84	0.0191	1
chr20:61263926-61265404	ENSG00000179242	CDH4	protein_coding	cadherin 4 [Source:HGNC Symbol;Acc:HGNC:1763]	GeneBody	1480	+	-0.421277	1.54	3.76	-2.22	0.0191	1
chr10:76203606-76204358	ENSG00000148655	LRMDA	protein_coding	leucine rich melanocyte differentiation associated [Source:HGNC Symbol;Acc:HGNC:23405]	GeneBody	754	+	-0.622739	3.09	4.61	-1.52	0.0191	1
chr10:23009992-23011238	ENSG00000165309	ARMC3	protein_coding	armadillo repeat containing 3 [Source:HGNC Symbol;Acc:HGNC:30964]	GeneBody	1248	+	-0.81037	4.21	5.34	-1.13	0.0192	1
chr17:21356471-21357720					Intergenic	1251		-0.536467	3.7	4.97	-1.27	0.0192	1
chr3:111137209-111137752	ENSG00000177707	NECTIN3	protein_coding	nectin cell adhesion molecule 3 [Source:HGNC Symbol;Acc:HGNC:17664]	Terminator	545	+	0.216867	5.21	3.83	1.39	0.0192	1
chr2:95023168-95023755	ENSG00000233850	AC103563.7	lncRNA	novel transcript	Promoter,Terminator	589	-	-0.239057	2.74	4.4	-1.66	0.0193	1
chr10:28336773-28337364					Intergenic	593		-0.164062	2.41	4.14	-1.73	0.0193	1
chr16:65550427-65550961	ENSG00000261742	LINC00922	lncRNA	long intergenic non-protein coding RNA 922 [Source:HGNC Symbol;Acc:HGNC:27545]	GeneBody	536	-	-0.333333	1.61	3.75	-2.14	0.0193	1
chr8:133880155-133880852					Intergenic	699		0.103448	4.01	1.95	2.07	0.0193	1
chr16:15500522-15501624	ENSG00000261130	AC140504.1	protein_coding	MPV17 mitochondrial inner membrane protein like [Source:NCBI gene;Acc:255027]	GeneBody	1104	+	-0.0507812	4.37	2.75	1.63	0.0193	1
chr19:9983170-9983928	ENSG00000080573	COL5A3	protein_coding	collagen type V alpha 3 chain [Source:HGNC Symbol;Acc:HGNC:14864]	GeneBody	760	-	0.364548	4.19	2.29	1.9	0.0194	1
chr7:101515223-101515890	ENSG00000160963	COL26A1	protein_coding	collagen type XXVI alpha 1 chain [Source:HGNC Symbol;Acc:HGNC:18038]	GeneBody	669	+	-0.011976	2.96	0.02	2.94	0.0194	1
chr1:100091621-100092542	ENSG00000156876	SASS6	protein_coding	SAS-6 centriolar assembly protein [Source:HGNC Symbol;Acc:HGNC:25403]	GeneBody	923	-	0.202614	4.4	2.88	1.52	0.0195	1
chr12:116788729-116789947	ENSG00000135119	RNFT2	protein_coding	ring finger protein, transmembrane 2 [Source:HGNC Symbol;Acc:HGNC:25905]	GeneBody	1220	+	0.993377	3.07	4.52	-1.45	0.0195	1
chr19:53469201-53469906	ENSG00000287608	AC022137.4	lncRNA	novel transcript, antisense to ZNF761and ZNF813	GeneBody	707	-	0.292398	2.97	4.64	-1.66	0.0195	1
chr17:73268902-73269613					Intergenic	713		-0.903226	1.42	3.62	-2.2	0.0197	1
chr2:105102371-105103401	ENSG00000231851	MRPS9-AS1	lncRNA	MRPS9 antisense RNA 1 [Source:HGNC Symbol;Acc:HGNC:40688]	Promoter	1032	-	0.348231	3.52	4.84	-1.32	0.0197	1
chr13:79669613-79670367					Intergenic	756		-0.263441	2.36	4.1	-1.74	0.0198	1
chr6:30907988-30909052	ENSG00000213780	GTF2H4	protein_coding	general transcription factor IIH subunit 4 [Source:HGNC Symbol;Acc:HGNC:4658]	Promoter	1066	+	0.21223	4.01	5.25	-1.25	0.0198	1
chr3:193979641-193980442	ENSG00000214146	LINC02026	lncRNA	long intergenic non-protein coding RNA 2026 [Source:HGNC Symbol;Acc:HGNC:52861]	Promoter,GeneBody	803	-	0.121813	2.44	4.22	-1.78	0.0198	1
chr14:75867542-75869047	ENSG00000119685	TTLL5	protein_coding	tubulin tyrosine ligase like 5 [Source:HGNC Symbol;Acc:HGNC:19963]	GeneBody	1507	+	0.0251852	4.44	5.64	-1.19	0.0199	1
chr1:150490866-150492144	ENSG00000143374	TARS2	protein_coding	threonyl-tRNA synthetase 2, mitochondrial [Source:HGNC Symbol;Acc:HGNC:30740]	GeneBody	1280	+	-0.00689655	2.99	4.48	-1.5	0.0201	1
chr20:61632974-61633664	ENSG00000179242	CDH4	protein_coding	cadherin 4 [Source:HGNC Symbol;Acc:HGNC:1763]	GeneBody	692	+	-0.764331	3.04	4.54	-1.5	0.0202	1
chr5:82975456-82976130					Intergenic	676		0.315476	2.1	4.05	-1.95	0.0203	1
chr3:48589645-48591162	ENSG00000114270	COL7A1	protein_coding	collagen type VII alpha 1 chain [Source:HGNC Symbol;Acc:HGNC:2214]	GeneBody	1519	-	0.255392	2.91	4.57	-1.67	0.0203	1
chr22:23807682-23809429	ENSG00000099956	SMARCB1	protein_coding	SWI/SNF related, matrix associated, actin dependent regulator of chromatin, subfamily b, member 1 [Source:HGNC Symbol;Acc:HGNC:11103]	GeneBody	1749	+	-0.0366972	4.68	3.25	1.43	0.0204	1
chr18:76566830-76567759					Intergenic	931		-0.250493	4.23	5.36	-1.13	0.0204	1
chr12:119471818-119472581	ENSG00000183273	CCDC60	protein_coding	coiled-coil domain containing 60 [Source:HGNC Symbol;Acc:HGNC:28610]	GeneBody	765	+	-0.286908	2.92	4.37	-1.45	0.0206	1
chr13:51173405-51174609					Intergenic	1206		-0.359699	2.29	4.06	-1.77	0.0207	1
chr14:73137095-73137917	ENSG00000080815	PSEN1	protein_coding	presenilin 1 [Source:HGNC Symbol;Acc:HGNC:9508]	Promoter,GeneBody	824	+	0.317191	2.84	4.49	-1.66	0.021	1
chrX:64845216-64845755					Intergenic	541		-0.56391	3.38	4.7	-1.32	0.021	1
chr10:45869849-45870934					Intergenic	1087		-0.36891	0.5	3.04	-2.54	0.0211	1
chr14:74579852-74580416	ENSG00000119681	LTBP2	protein_coding	latent transforming growth factor beta binding protein 2 [Source:HGNC Symbol;Acc:HGNC:6715]	GeneBody	566	-	0.28125	3.57	4.82	-1.25	0.0211	1
chr6:43790067-43791017					Intergenic	952		0	2.75	4.32	-1.57	0.0212	1
chr3:186985609-186986073	ENSG00000073849	ST6GAL1	protein_coding	ST6 beta-galactoside alpha-2,6-sialyltransferase 1 [Source:HGNC Symbol;Acc:HGNC:10860]	GeneBody	466	+	0.297778	4.66	3.28	1.38	0.0212	1
chr19:44761907-44762760	ENSG00000069399	BCL3	protein_coding	BCL3 transcription coactivator [Source:HGNC Symbol;Acc:HGNC:998]	Terminator	855	+	0.00454545	4.36	2.78	1.57	0.0212	1
chr6:110448868-110450074	ENSG00000004809	SLC22A16	protein_coding	solute carrier family 22 member 16 [Source:HGNC Symbol;Acc:HGNC:20302]	GeneBody	1208	-	-0.373849	2.86	4.5	-1.64	0.0214	1
chr8:142149870-142151264	ENSG00000287332	AC103758.1	lncRNA	novel transcript	GeneBody	1396	-	0.859477	4.3	5.46	-1.16	0.0214	1
chr20:35100802-35101443					Intergenic	643		-0.117647	2.44	4.18	-1.74	0.0214	1
chr1:244360695-244361435	ENSG00000173728	C1orf100	protein_coding	chromosome 1 open reading frame 100 [Source:HGNC Symbol;Acc:HGNC:30435]	GeneBody	742	+	0.16208	4.79	3.34	1.45	0.0214	1
chr5:178221343-178222118	ENSG00000175309	PHYKPL	protein_coding	5-phosphohydroxy-L-lysine phospho-lyase [Source:HGNC Symbol;Acc:HGNC:28249]	GeneBody	777	-	-0.267327	2.34	4.11	-1.77	0.0215	1
chr9:118487743-118488588					Intergenic	847		0.550265	1.08	3.4	-2.32	0.0215	1
chr1:205886807-205887288					Intergenic	483		0.39738	1.92	3.83	-1.91	0.0216	1
chr20:57780658-57781459					Intergenic	803		-0.596817	2.53	4.34	-1.81	0.0218	1
chr8:144783945-144785139	ENSG00000196378	ZNF34	protein_coding	zinc finger protein 34 [Source:HGNC Symbol;Acc:HGNC:13098]	GeneBody	1196	-	0.123389	5.08	3.84	1.23	0.0218	1
chr16:6214178-6215214	ENSG00000078328	RBFOX1	protein_coding	RNA binding fox-1 homolog 1 [Source:HGNC Symbol;Acc:HGNC:18222]	GeneBody	1038	+	0.826087	3.68	5	-1.32	0.0218	1
chr7:156949704-156951129	ENSG00000146909	NOM1	protein_coding	nucleolar protein with MIF4G domain 1 [Source:HGNC Symbol;Acc:HGNC:13244]	Promoter,GeneBody	1427	+	0.161058	3.46	4.77	-1.3	0.0218	1
chr12:130390390-130391134					Intergenic	746		-0.187817	1.78	3.81	-2.03	0.0218	1
chr14:102807174-102807720	ENSG00000131323	TRAF3	protein_coding	TNF receptor associated factor 3 [Source:HGNC Symbol;Acc:HGNC:12033]	GeneBody	548	+	-0.151515	2.19	4.02	-1.83	0.0218	1
chr11:69198533-69199677					Intergenic	1146		-0.3902	3.81	5	-1.19	0.0219	1
chr6:63421365-63422333					Intergenic	970		0.00458716	4.18	2.36	1.82	0.022	1
chr14:68924575-68925317	ENSG00000072110	ACTN1	protein_coding	actinin alpha 1 [Source:HGNC Symbol;Acc:HGNC:163]	GeneBody	744	-	0.237113	2.35	4.11	-1.76	0.022	1
chr4:42123721-42124497	ENSG00000188848	BEND4	protein_coding	BEN domain containing 4 [Source:HGNC Symbol;Acc:HGNC:23815]	GeneBody	778	-	0.24933	3.08	4.57	-1.5	0.022	1
chr10:68831282-68832081	ENSG00000165730	STOX1	protein_coding	storkhead box 1 [Source:HGNC Symbol;Acc:HGNC:23508]	GeneBody	801	+	0.0157068	3.94	1.96	1.98	0.0222	1
chr3:127476195-127476996					Intergenic	803		0.212121	2.39	4.18	-1.78	0.0222	1
chr12:22195020-22195549	ENSG00000111728	ST8SIA1	protein_coding	ST8 alpha-N-acetyl-neuraminide alpha-2,8-sialyltransferase 1 [Source:HGNC Symbol;Acc:HGNC:10869]	GeneBody	531	-	0.0456432	4.35	2.87	1.48	0.0223	1
chrX:65131324-65132658					Intergenic	1336		0.480519	4.69	5.88	-1.19	0.0224	1
chr19:37376385-37377117	ENSG00000189164	ZNF527	protein_coding	zinc finger protein 527 [Source:HGNC Symbol;Acc:HGNC:29385]	GeneBody	734	+	0.202703	4.37	2.9	1.47	0.0224	1
chr19:39410269-39411053	ENSG00000128016	ZFP36	protein_coding	ZFP36 ring finger protein [Source:HGNC Symbol;Acc:HGNC:12862]	Promoter,Terminator	786	+	-0.532407	3.35	4.67	-1.32	0.0224	1
chr12:109827398-109828040					Intergenic	644		-0.5	4.36	2.88	1.49	0.0224	1
chr2:230081204-230081966					Intergenic	764		-0.132743	2.34	4.14	-1.8	0.0224	1
chr3:16101450-16102106					Intergenic	658		0.346154	2.94	4.38	-1.44	0.0224	1
chr17:17407040-17407568					Intergenic	530		0.285714	2.15	4.05	-1.9	0.0225	1
chr16:8761664-8762311	ENSG00000183044	ABAT	protein_coding	4-aminobutyrate aminotransferase [Source:HGNC Symbol;Acc:HGNC:23]	GeneBody	649	+	-0.219672	2.26	4.04	-1.78	0.0225	1
chr7:26191902-26192277	ENSG00000122566	HNRNPA2B1	protein_coding	heterogeneous nuclear ribonucleoprotein A2/B1 [Source:HGNC Symbol;Acc:HGNC:5033]	GeneBody	377	-	-0.213115	4.2	2.62	1.58	0.0225	1
chr12:9715764-9716476					Intergenic	714		-0.39645	2.94	4.43	-1.5	0.0226	1
chr2:96920083-96920489	ENSG00000168754	FAM178B	protein_coding	family with sequence similarity 178 member B [Source:HGNC Symbol;Acc:HGNC:28036]	GeneBody	408	-	0.207373	0.6	3.13	-2.53	0.0227	1
chr5:142621079-142621790	ENSG00000113578	FGF1	protein_coding	fibroblast growth factor 1 [Source:HGNC Symbol;Acc:HGNC:3665]	GeneBody	713	-	-0.451327	2.38	4.28	-1.91	0.0227	1
chr5:180820190-180820675					Intergenic	487		0.178423	1.51	3.7	-2.19	0.0227	1
chr1:70279468-70280312	ENSG00000118454	ANKRD13C	protein_coding	ankyrin repeat domain 13C [Source:HGNC Symbol;Acc:HGNC:25374]	GeneBody	846	-	0.116147	1.93	3.86	-1.94	0.0227	1
chr2:77091661-77092306	ENSG00000176204	LRRTM4	protein_coding	leucine rich repeat transmembrane neuronal 4 [Source:HGNC Symbol;Acc:HGNC:19411]	GeneBody	647	-	-0.447368	-0.24	2.68	-2.91	0.0227	1
chr1:118537053-118537641					Intergenic	590		-0.208955	2.99	4.57	-1.58	0.0227	1
chr20:49741080-49742342					Intergenic	1264		-0.2384	3.63	5.01	-1.39	0.0228	1
chr4:178207732-178208410					Intergenic	680		-0.36	2.43	4.21	-1.78	0.0228	1
chr1:93694416-93695178					Intergenic	764		-0.420513	2.5	4.27	-1.78	0.0229	1
chr8:95724404-95724899	ENSG00000253773	C8orf37-AS1	lncRNA	C8orf37 antisense RNA 1 [Source:HGNC Symbol;Acc:HGNC:50444]	GeneBody	497	+	-0.0353982	1.14	3.44	-2.3	0.0229	1
chr1:225905153-225905975	ENSG00000255835	AL117348.2	protein_coding	novel protein	GeneBody	824	-	0.23348	2.95	4.57	-1.62	0.0229	1
chr2:101991918-101992830	ENSG00000115590	IL1R2	protein_coding	interleukin 1 receptor type 2 [Source:HGNC Symbol;Acc:HGNC:5994]	Promoter	914	+	0.509356	3.38	4.9	-1.52	0.0229	1
chr3:125067196-125067944					Intergenic	750		0.372549	3.76	5.02	-1.26	0.023	1
chr16:4941219-4942291					Intergenic	1074		0.00732601	3	4.42	-1.43	0.023	1
chr2:126677071-126677699	ENSG00000136732	GYPC	protein_coding	glycophorin C (Gerbich blood group) [Source:HGNC Symbol;Acc:HGNC:4704]	GeneBody	630	+	0.57931	3.08	4.47	-1.39	0.023	1
chr3:109458743-109459180	ENSG00000228980	LINC01205	lncRNA	long intergenic non-protein coding RNA 1205 [Source:HGNC Symbol;Acc:HGNC:49636]	GeneBody	439	+	-0.0128205	4.06	1.62	2.44	0.0232	1
chr14:21322093-21322974	ENSG00000092200	RPGRIP1	protein_coding	RPGR interacting protein 1 [Source:HGNC Symbol;Acc:HGNC:13436]	GeneBody	883	+	-0.0891089	2.06	3.99	-1.93	0.0232	1
chr7:48463557-48463989	ENSG00000179869	ABCA13	protein_coding	ATP binding cassette subfamily A member 13 [Source:HGNC Symbol;Acc:HGNC:14638]	GeneBody	434	+	0.352381	1.92	3.92	-2	0.0233	1
chr4:8683451-8683965					Intergenic	516		0.913386	0.84	3.33	-2.49	0.0233	1
chr7:105376228-105376710	ENSG00000135250	SRPK2	protein_coding	SRSF protein kinase 2 [Source:HGNC Symbol;Acc:HGNC:11306]	GeneBody	484	-	-0.353448	1.89	3.85	-1.96	0.0233	1
chr3:196738860-196739391	ENSG00000180370	PAK2	protein_coding	p21 (RAC1) activated kinase 2 [Source:HGNC Symbol;Acc:HGNC:8591]	Promoter	533	+	-0.137405	1.57	3.66	-2.09	0.0234	1
chr6:154558431-154558973					Intergenic	544		0.0418251	3.4	1.14	2.26	0.0235	1
chr5:154509043-154509768					Intergenic	727		0.28841	2.42	4.25	-1.84	0.0236	1
chr17:46609825-46610402	ENSG00000073969	NSF	protein_coding	N-ethylmaleimide sensitive factor, vesicle fusing ATPase [Source:HGNC Symbol;Acc:HGNC:8016]	GeneBody	579	+	-0.378486	3.07	0.63	2.45	0.0237	1
chr19:43340338-43341480					Intergenic	1144		-0.301754	3.59	4.84	-1.25	0.0237	1
chr5:171644027-171644803					Intergenic	778		0.316456	3.08	4.44	-1.36	0.0237	1
chr8:51640443-51643204	ENSG00000147485	PXDNL	protein_coding	peroxidasin like [Source:HGNC Symbol;Acc:HGNC:26359]	GeneBody	2763	-	-0.0849673	2.7	-0.42	3.11	0.0238	1
chr1:153623816-153624725	ENSG00000189171	S100A13	protein_coding	S100 calcium binding protein A13 [Source:HGNC Symbol;Acc:HGNC:10490]	GeneBody,Terminator	911	-	0.33995	2.9	4.47	-1.56	0.0238	1
chr5:175135133-175137477					Intergenic	2346		0.0807577	-0.24	2.53	-2.77	0.0239	1
chr19:40216500-40217347	ENSG00000174521	TTC9B	protein_coding	tetratricopeptide repeat domain 9B [Source:HGNC Symbol;Acc:HGNC:26395]	GeneBody,Terminator	849	-	0.0813008	2.9	4.42	-1.52	0.024	1
chr16:28928528-28929282					Intergenic	756		0.0119048	5.04	3.83	1.21	0.024	1
chr6:107973182-107974088					Intergenic	908		0.120393	3.51	4.73	-1.22	0.024	1
chr3:171247739-171248368	ENSG00000154310	TNIK	protein_coding	TRAF2 and NCK interacting kinase [Source:HGNC Symbol;Acc:HGNC:30765]	GeneBody	631	-	0.385666	2.88	4.39	-1.51	0.0241	1
chr6:85864722-85865419					Intergenic	699		-0.259036	2.2	4.06	-1.86	0.0241	1
chr19:53809091-53809774	ENSG00000142405	NLRP12	protein_coding	NLR family pyrin domain containing 12 [Source:HGNC Symbol;Acc:HGNC:22938]	GeneBody	685	-	0.0503979	5.03	3.59	1.44	0.0242	1
chr22:21849006-21849514	ENSG00000100030	MAPK1	protein_coding	mitogen-activated protein kinase 1 [Source:HGNC Symbol;Acc:HGNC:6871]	GeneBody	510	-	0.092511	3.78	1.52	2.26	0.0242	1
chr9:125131965-125132628	ENSG00000173611	SCAI	protein_coding	suppressor of cancer cell invasion [Source:HGNC Symbol;Acc:HGNC:26709]	GeneBody	665	-	-0.148649	3.75	1.54	2.21	0.0242	1
chr11:57179581-57180138	ENSG00000183908	LRRC55	protein_coding	leucine rich repeat containing 55 [Source:HGNC Symbol;Acc:HGNC:32324]	Promoter	559	+	0.0470219	2.25	4.11	-1.85	0.0243	1
chr14:48259491-48260119	ENSG00000287492	AL512358.2	lncRNA	novel transcript	Terminator	630	-	0.396721	2.01	4	-1.99	0.0243	1
chr19:55635261-55636786	ENSG00000171425	ZNF581	protein_coding	zinc finger protein 581 [Source:HGNC Symbol;Acc:HGNC:25017]	Promoter,GeneBody	1527	+	0.346389	4.54	5.6	-1.06	0.0243	1
chr16:13472308-13473349					Intergenic	1043		-0.122078	4.17	2.15	2.02	0.0244	1
chr3:58652211-58653261	ENSG00000198643	FAM3D	protein_coding	FAM3 metabolism regulating signaling molecule D [Source:HGNC Symbol;Acc:HGNC:18665]	GeneBody	1052	-	-0.559118	2.57	4.3	-1.74	0.0244	1
chr5:1367513-1368105	ENSG00000250584	LINC01511	lncRNA	long intergenic non-protein coding RNA 1511 [Source:HGNC Symbol;Acc:HGNC:51200]	GeneBody	594	-	0.0396825	4.57	3.18	1.39	0.0245	1
chr12:110060011-110061699	ENSG00000174456	C12orf76	protein_coding	chromosome 12 open reading frame 76 [Source:HGNC Symbol;Acc:HGNC:33790]	Promoter	1690	-	-0.297232	4.13	5.26	-1.13	0.0245	1
chr17:78876506-78877444	ENSG00000035862	TIMP2	protein_coding	TIMP metallopeptidase inhibitor 2 [Source:HGNC Symbol;Acc:HGNC:11821]	GeneBody	940	-	-0.1258	2.29	4.02	-1.73	0.0245	1
chr20:19755250-19756568	ENSG00000268628	AL121761.1	lncRNA	novel transcript	Terminator	1320	-	0.336377	0.6	3.03	-2.43	0.0246	1
chr9:86617472-86617997					Intergenic	527		0.169355	1.37	3.65	-2.29	0.0247	1
chr9:88730477-88731086					Intergenic	611		-0.914474	2.59	4.24	-1.64	0.0247	1
chr19:32728428-32729793	ENSG00000173809	TDRD12	protein_coding	tudor domain containing 12 [Source:HGNC Symbol;Acc:HGNC:25044]	GeneBody	1367	+	-0.118959	3.24	0.83	2.4	0.0247	1
chr1:116292151-116292572	ENSG00000287217	AL355538.2	lncRNA	novel transcript	GeneBody	423	-	-0.227053	3.08	4.52	-1.44	0.0247	1
chr22:16254575-16255329					Intergenic	756		0.789116	4.18	2.56	1.61	0.0247	1
chr11:63839660-63841600	ENSG00000072518	MARK2	protein_coding	microtubule affinity regulating kinase 2 [Source:HGNC Symbol;Acc:HGNC:3332]	Promoter,GeneBody	1942	+	-0.28444	4.75	5.75	-1	0.0249	1
chr3:115689624-115690270	ENSG00000172020	GAP43	protein_coding	growth associated protein 43 [Source:HGNC Symbol;Acc:HGNC:4140]	GeneBody	648	+	0.269841	1.49	3.73	-2.24	0.0251	1
chr14:70701369-70702296	ENSG00000258689	LINC01269	lncRNA	long intergenic non-protein coding RNA 1269 [Source:HGNC Symbol;Acc:HGNC:50325]	GeneBody	929	+	0.223176	3.64	4.88	-1.24	0.0252	1
chr16:80742391-80743128	ENSG00000166446	CDYL2	protein_coding	chromodomain Y like 2 [Source:HGNC Symbol;Acc:HGNC:23030]	GeneBody,Terminator	739	-	0.810651	3.22	4.54	-1.33	0.0254	1
chr1:59142396-59143407	ENSG00000224609	AC093425.1	lncRNA	novel transcript	GeneBody	1013	-	0.253275	2.9	4.41	-1.51	0.0254	1
chr2:239754784-239755771					Intergenic	989		0.831533	1.91	3.87	-1.97	0.0254	1
chr15:78437842-78438521	ENSG00000136381	IREB2	protein_coding	iron responsive element binding protein 2 [Source:HGNC Symbol;Acc:HGNC:6115]	Promoter	681	+	-0.166276	1.81	4	-2.19	0.0256	1
chr19:39878398-39879115	ENSG00000275395	FCGBP	protein_coding	Fc fragment of IgG binding protein [Source:HGNC Symbol;Acc:HGNC:13572]	GeneBody	719	-	-0.374269	3.59	4.86	-1.27	0.0256	1
chr5:7248433-7249314					Intergenic	883		0.346535	3.01	4.59	-1.58	0.0257	1
chr17:22052597-22053351					Intergenic	756		-0.61791	2.69	4.22	-1.53	0.0257	1
chr2:128513855-128515298					Intergenic	1445		-0.216602	3.46	4.71	-1.25	0.0258	1
chr16:64561198-64561704	ENSG00000259846	AC092131.1	lncRNA	novel transcript	GeneBody	508	+	0.67619	4.33	2.87	1.46	0.0258	1
chr22:39239523-39241381	ENSG00000100311	PDGFB	protein_coding	platelet derived growth factor subunit B [Source:HGNC Symbol;Acc:HGNC:8800]	GeneBody	1860	-	-0.0881801	3.9	5.27	-1.37	0.026	1
chr1:43575610-43576291	ENSG00000142949	PTPRF	protein_coding	protein tyrosine phosphatase receptor type F [Source:HGNC Symbol;Acc:HGNC:9670]	GeneBody	683	+	-0.349081	3.02	4.41	-1.39	0.026	1
chr11:69300436-69301092					Intergenic	658		0.55625	2.91	4.39	-1.48	0.0261	1
chr10:35099405-35100052					Intergenic	649		0.123506	4.42	2.9	1.52	0.0261	1
chr5:5954679-5955613					Intergenic	936		-0.77381	5.08	6.03	-0.95	0.0261	1
chr1:203033855-203034707	ENSG00000143847	PPFIA4	protein_coding	PTPRF interacting protein alpha 4 [Source:HGNC Symbol;Acc:HGNC:9248]	Promoter	854	+	0.314168	2.88	4.3	-1.43	0.0262	1
chr1:118163295-118163969	ENSG00000155761	SPAG17	protein_coding	sperm associated antigen 17 [Source:HGNC Symbol;Acc:HGNC:26620]	GeneBody	676	-	-0.379538	4.09	5.24	-1.15	0.0262	1
chr12:23034266-23035075	ENSG00000256995	AC084816.1	lncRNA	novel transcript	GeneBody	811	+	-0.657534	4.81	3.65	1.16	0.0262	1
chr14:22759689-22761159	ENSG00000258458	AL160314.2	lncRNA	novel transcript, antisense to OXA1L	GeneBody	1472	-	-0.0696296	2.13	4.04	-1.9	0.0263	1
chr7:157764863-157766586	ENSG00000155093	PTPRN2	protein_coding	protein tyrosine phosphatase receptor type N2 [Source:HGNC Symbol;Acc:HGNC:9677]	GeneBody	1725	-	-0.929577	4.53	5.68	-1.15	0.0265	1
chr5:83484322-83484859	ENSG00000038427	VCAN	protein_coding	versican [Source:HGNC Symbol;Acc:HGNC:2464]	GeneBody	539	+	-0.370892	1.34	3.59	-2.25	0.0266	1
chr3:111081955-111082504	ENSG00000177707	NECTIN3	protein_coding	nectin cell adhesion molecule 3 [Source:HGNC Symbol;Acc:HGNC:17664]	GeneBody	551	+	0.623318	3.86	5.32	-1.46	0.0266	1
chr1:57388377-57389076	ENSG00000227935	AL390243.1	lncRNA	novel transcript	GeneBody,Terminator	701	+	-0.401198	1.99	3.89	-1.9	0.0266	1
chr5:151559505-151560177	ENSG00000086570	FAT2	protein_coding	FAT atypical cadherin 2 [Source:HGNC Symbol;Acc:HGNC:3596]	GeneBody	674	-	-0.454006	3.23	4.53	-1.31	0.0266	1
chr10:1347577-1348725	ENSG00000185736	ADARB2	protein_coding	adenosine deaminase RNA specific B2 (inactive) [Source:HGNC Symbol;Acc:HGNC:227]	GeneBody	1150	-	0.118694	3.2	4.71	-1.51	0.0267	1
chrX:953295-954443					Intergenic	1150		-0.927481	3.55	4.8	-1.25	0.0269	1
chr10:7581280-7581874	ENSG00000123243	ITIH5	protein_coding	inter-alpha-trypsin inhibitor heavy chain 5 [Source:HGNC Symbol;Acc:HGNC:21449]	GeneBody	596	-	-0.0224215	4.24	2.51	1.73	0.027	1
chr9:65487434-65489247					Intergenic	1815		-0.553047	1.7	3.8	-2.1	0.027	1
chr2:48607607-48608364	ENSG00000068781	STON1-GTF2A1L	protein_coding	STON1-GTF2A1L readthrough [Source:HGNC Symbol;Acc:HGNC:30651]	GeneBody	759	+	0.123288	2.86	4.41	-1.55	0.027	1
chr3:194302926-194304041	ENSG00000286317	AC117469.1	lncRNA	novel transcript	GeneBody,Terminator	1117	+	0.353571	3.01	4.62	-1.61	0.0271	1
chr20:38592613-38593516					Intergenic	905		0.414508	1.83	3.83	-1.99	0.0271	1
chr10:6633475-6634302					Intergenic	829		0.491358	2.14	3.89	-1.75	0.0272	1
chr1:63686499-63687183					Intergenic	686		-0.665595	2.77	4.36	-1.58	0.0272	1
chr19:11476925-11477688	ENSG00000196361	ELAVL3	protein_coding	ELAV like RNA binding protein 3 [Source:HGNC Symbol;Acc:HGNC:3314]	GeneBody	765	-	-0.0520231	4.33	2.92	1.41	0.0273	1
chr19:13857088-13858029					Intergenic	943		-0.0187793	3.64	1.37	2.27	0.0274	1
chr3:111904292-111904900	ENSG00000144824	PHLDB2	protein_coding	pleckstrin homology like domain family B member 2 [Source:HGNC Symbol;Acc:HGNC:29573]	GeneBody	610	+	0.272059	4.91	5.84	-0.94	0.0276	1
chr19:52129765-52130362	ENSG00000204611	ZNF616	protein_coding	zinc finger protein 616 [Source:HGNC Symbol;Acc:HGNC:28062]	GeneBody,Terminator	599	-	-0.153333	3.16	4.69	-1.53	0.0277	1
chr4:88719358-88719927	ENSG00000248019	FAM13A-AS1	lncRNA	FAM13A antisense RNA 1 [Source:HGNC Symbol;Acc:HGNC:19370]	Promoter,GeneBody	571	+	-0.722222	3.77	1.87	1.9	0.0278	1
chr20:2658816-2659833	ENSG00000101365	IDH3B	protein_coding	isocitrate dehydrogenase (NAD(+)) 3 non-catalytic subunit beta [Source:HGNC Symbol;Acc:HGNC:5385]	GeneBody,Terminator	1019	-	0.105169	3.67	4.95	-1.28	0.0278	1
chr4:69662984-69665740					Intergenic	2758		-0.000805802	-0.24	2.48	-2.72	0.0279	1
chr20:29497557-29498074					Intergenic	519		0.307937	0.63	3.15	-2.52	0.0279	1
chr1:201255960-201258987					Intergenic	3029		0.769483	4.39	5.43	-1.04	0.0279	1
chr6:154474470-154475873	ENSG00000288520	AL357075.4	protein_coding	CNK3/IPCEF1 fusion protein [Source:UniProtKB/Swiss-Prot;Acc:G9CGD6]	GeneBody	1405	-	-0.0247253	3.46	4.79	-1.33	0.028	1
chr19:44890128-44890752	ENSG00000130202	NECTIN2	protein_coding	nectin cell adhesion molecule 2 [Source:HGNC Symbol;Acc:HGNC:9707]	Promoter,Terminator	626	+	0.327217	2.51	4.12	-1.61	0.028	1
chr7:84018938-84020040	ENSG00000075213	SEMA3A	protein_coding	semaphorin 3A [Source:HGNC Symbol;Acc:HGNC:10723]	GeneBody	1104	-	0.151351	4.85	3.65	1.2	0.028	1
chr20:4439440-4440609					Intergenic	1171		0.350459	3.95	5.1	-1.15	0.028	1
chr2:127319259-127320309	ENSG00000286145	AC068282.1	lncRNA	novel transcript, antisense to MAP3K2	GeneBody	1052	+	-0.00626305	5.2	3.82	1.38	0.0281	1
chr8:143110223-143110746					Intergenic	525		-0.135593	1.84	3.83	-1.99	0.0281	1
chr19:48398869-48400210	ENSG00000105464	GRIN2D	protein_coding	glutamate ionotropic receptor NMDA type subunit 2D [Source:HGNC Symbol;Acc:HGNC:4588]	GeneBody	1343	+	0.355247	3.94	5.11	-1.17	0.0282	1
chr6:32178788-32179598	ENSG00000204308	RNF5	protein_coding	ring finger protein 5 [Source:HGNC Symbol;Acc:HGNC:10068]	Promoter,GeneBody,Terminator	812	+	0.477157	2.5	4.14	-1.63	0.0284	1
chr3:120094343-120095251	ENSG00000242622	AC092910.3	lncRNA	novel transcript	Promoter	910	+	-0.00346021	2.82	4.62	-1.8	0.0284	1
chr2:223194157-223195086					Intergenic	931		0.344538	3.61	4.84	-1.23	0.0284	1
chr16:26886888-26887673					Intergenic	787		0.276451	1.82	3.75	-1.93	0.0285	1
chr17:19889397-19889799					Intergenic	404		0.488636	1.56	3.75	-2.19	0.0286	1
chr6:11116813-11117682	ENSG00000224531	SMIM13	protein_coding	small integral membrane protein 13 [Source:HGNC Symbol;Acc:HGNC:27356]	GeneBody	871	+	-0.0422535	4.4	2.86	1.54	0.0286	1
chr14:77601472-77602547	ENSG00000100596	SPTLC2	protein_coding	serine palmitoyltransferase long chain base subunit 2 [Source:HGNC Symbol;Acc:HGNC:11278]	GeneBody	1077	-	-0.27907	4.47	5.46	-0.98	0.0286	1
chr12:12883003-12884396					Intergenic	1395		0.0658307	3.85	4.97	-1.11	0.0287	1
chr7:655997-657597	ENSG00000188191	PRKAR1B	protein_coding	protein kinase cAMP-dependent type I regulatory subunit beta [Source:HGNC Symbol;Acc:HGNC:9390]	GeneBody	1602	-	0.623318	3.71	5.23	-1.53	0.0288	1
chr5:129855488-129855988	ENSG00000251680	AC008591.1	lncRNA	novel transcript	GeneBody	502	-	-0.218487	2.6	4.11	-1.51	0.0288	1
chr10:90807623-90809045	ENSG00000148680	HTR7	protein_coding	5-hydroxytryptamine receptor 7 [Source:HGNC Symbol;Acc:HGNC:5302]	GeneBody	1424	-	-0.349931	3.26	4.55	-1.3	0.0288	1
chr14:76151706-76152788	ENSG00000283629	AC016526.4	lncRNA	novel transcript, antisense to GPATCH2L	Promoter	1084	-	-0.0132548	4.77	5.84	-1.07	0.029	1
chr7:130757330-130757897					Intergenic	569		-0.0252708	4.24	2.61	1.64	0.029	1
chr1:63663010-63663572					Intergenic	564		-0.371841	2.47	4.21	-1.74	0.029	1
chr20:62201963-62202946	ENSG00000101181	MTG2	protein_coding	mitochondrial ribosome associated GTPase 2 [Source:HGNC Symbol;Acc:HGNC:16239]	Terminator	985	+	0.0714286	4.59	3.1	1.48	0.029	1
chr20:58054596-58055167					Intergenic	573		-0.0434783	1.9	3.82	-1.92	0.0291	1
chr6:30091764-30092249					Intergenic	487		-0.23741	1.6	3.61	-2.02	0.0291	1
chr20:54095798-54096736					Intergenic	940		-0.0491803	4.54	2.97	1.57	0.0292	1
chr8:132673572-132674405	ENSG00000129295	LRRC6	protein_coding	leucine rich repeat containing 6 [Source:HGNC Symbol;Acc:HGNC:16725]	GeneBody	835	-	0.138322	3.89	5.03	-1.15	0.0292	1
chr6:44041231-44042093	ENSG00000237686	AL109615.3	lncRNA	novel transcript, antisense to C6orf223	GeneBody	864	-	-0.0611354	2.41	4.21	-1.81	0.0292	1
chr10:42296730-42299391					Intergenic	2663		-0.599251	4.38	5.74	-1.36	0.0292	1
chr1:228787888-228788409					Intergenic	523		-0.338583	2.57	4.09	-1.53	0.0293	1
chr5:14418599-14419259	ENSG00000038382	TRIO	protein_coding	trio Rho guanine nucleotide exchange factor [Source:HGNC Symbol;Acc:HGNC:12303]	GeneBody	662	+	0.287293	2.99	4.49	-1.5	0.0295	1
chr21:9246230-9249234					Intergenic	3006		0.759942	6.78	7.74	-0.96	0.0296	1
chr7:35044087-35046266	ENSG00000287249	AC005400.1	lncRNA	novel transcript, antisense to DPY19L1	GeneBody	2181	+	-0.643987	0.8	3.08	-2.27	0.0296	1
chr5:34962316-34962835					Intergenic	521		0.0882353	3.65	1.22	2.43	0.0297	1
chr2:223189187-223189732					Intergenic	547		0.489362	1.71	3.73	-2.02	0.0297	1
chr1:244883464-244883997					Intergenic	535		-0.156522	4.52	3.15	1.37	0.0298	1
chr1:149904644-149905345	ENSG00000159164	SV2A	protein_coding	synaptic vesicle glycoprotein 2A [Source:HGNC Symbol;Acc:HGNC:20566]	GeneBody	703	-	0.2	1.12	3.62	-2.49	0.0298	1
chr22:24891519-24892123	ENSG00000167037	SGSM1	protein_coding	small G protein signaling modulator 1 [Source:HGNC Symbol;Acc:HGNC:29410]	GeneBody	606	+	0.360704	2.88	4.31	-1.44	0.0298	1
chr9:122331457-122332361	ENSG00000148187	MRRF	protein_coding	mitochondrial ribosome recycling factor [Source:HGNC Symbol;Acc:HGNC:7234]	Terminator	906	+	0.291139	2.21	4.12	-1.91	0.03	1
chr9:112882400-112883784	ENSG00000119457	SLC46A2	protein_coding	solute carrier family 46 member 2 [Source:HGNC Symbol;Acc:HGNC:16055]	Promoter,GeneBody	1386	-	0.295269	2.54	4.23	-1.7	0.0301	1
chr19:38738593-38739720	ENSG00000267892	AC022144.1	lncRNA	novel transcript, antisense to CAPN12	Promoter,GeneBody,Terminator	1129	+	0.123675	4.65	3.39	1.26	0.0301	1
chr19:16718678-16719802	ENSG00000188039	NWD1	protein_coding	NACHT and WD repeat domain containing 1 [Source:HGNC Symbol;Acc:HGNC:27619]	Promoter	1126	+	-0.0252708	1.51	3.69	-2.18	0.0302	1
chr17:6148618-6149379					Intergenic	763		-0.383838	2.82	4.26	-1.44	0.0303	1
chr14:55608841-55609438	ENSG00000126777	KTN1	protein_coding	kinectin 1 [Source:HGNC Symbol;Acc:HGNC:6467]	GeneBody	599	+	-0.037037	1.93	3.88	-1.95	0.0303	1
chr8:131312896-131313687	ENSG00000253507	AC104257.1	lncRNA	novel transcript	GeneBody	793	+	-0.497175	-0.24	2.6	-2.84	0.0303	1
chr22:23913590-23913966					Intergenic	378		-0.362832	1.49	3.63	-2.14	0.0304	1
chr6:169262645-169263694					Intergenic	1051		-0.34139	-0.24	2.93	-3.17	0.0304	1
chr6:32185202-32186519	ENSG00000273333	AL662884.1	lncRNA	novel transcript	Promoter,GeneBody,Terminator	1319	-	0.0602782	1.7	3.72	-2.02	0.0304	1
chr7:135551388-135552195					Intergenic	809		-0.0306122	2.58	4.15	-1.56	0.0304	1
chr15:17080559-17083159					Intergenic	2602		0.85087	4.46	5.55	-1.09	0.0305	1
chr20:5167961-5169153	ENSG00000101290	CDS2	protein_coding	CDP-diacylglycerol synthase 2 [Source:HGNC Symbol;Acc:HGNC:1801]	GeneBody	1194	+	0.0343643	3.88	5.05	-1.17	0.0305	1
chr19:51019896-51020514	ENSG00000129451	KLK10	protein_coding	kallikrein related peptidase 10 [Source:HGNC Symbol;Acc:HGNC:6358]	Promoter,Terminator	620	-	0.181818	2.83	4.4	-1.57	0.0305	1
chr1:115314950-115315463	ENSG00000134259	NGF	protein_coding	nerve growth factor [Source:HGNC Symbol;Acc:HGNC:7808]	GeneBody	515	-	0.35743	3.54	4.7	-1.16	0.0305	1
chr11:21262820-21263245	ENSG00000255167	AC090857.2	lncRNA	novel transcript	Promoter,GeneBody	427	-	-0.154362	3.36	0.85	2.51	0.0306	1
chr2:131541896-131542975					Intergenic	1081		-0.773234	3.37	4.66	-1.29	0.0307	1
chr7:155918486-155919252					Intergenic	768		0.587209	3.43	4.62	-1.19	0.0308	1
chr16:49617296-49618721	ENSG00000102935	ZNF423	protein_coding	zinc finger protein 423 [Source:HGNC Symbol;Acc:HGNC:16762]	GeneBody	1427	-	-0.202156	3.34	4.79	-1.46	0.0309	1
chr10:72215569-72216338	ENSG00000138303	ASCC1	protein_coding	activating signal cointegrator 1 complex subunit 1 [Source:HGNC Symbol;Acc:HGNC:24268]	Promoter	771	-	0.117517	3.46	4.73	-1.27	0.0309	1
chr7:150852461-150852931	ENSG00000002726	AOC1	protein_coding	amine oxidase copper containing 1 [Source:HGNC Symbol;Acc:HGNC:80]	Promoter	472	+	0.250909	0.67	3.04	-2.37	0.0309	1
chr7:99142426-99143524	ENSG00000198742	SMURF1	protein_coding	SMAD specific E3 ubiquitin protein ligase 1 [Source:HGNC Symbol;Acc:HGNC:16807]	Promoter,GeneBody	1100	-	0.630592	4.13	5.25	-1.12	0.0311	1
chr7:55733033-55733836					Intergenic	805		-0.0607029	6.12	5.09	1.03	0.0311	1
chr19:54741748-54743039	ENSG00000243772	KIR2DL3	protein_coding	killer cell immunoglobulin like receptor, two Ig domains and long cytoplasmic tail 3 [Source:HGNC Symbol;Acc:HGNC:6331]	GeneBody	1293	+	0.0566038	2.73	4.41	-1.68	0.0311	1
chr1:203597775-203598645					Intergenic	872		-0.303371	2.61	4.11	-1.5	0.0313	1
chr19:17254900-17255627	ENSG00000269095	AC010646.1	protein_coding	novel protein	Promoter,GeneBody	729	-	0.0124069	1.62	3.7	-2.07	0.0313	1
chr7:57487413-57491015					Intergenic	3604		0.560606	4.9	6.11	-1.21	0.0313	1
chr8:139872006-139873207	ENSG00000167632	TRAPPC9	protein_coding	trafficking protein particle complex 9 [Source:HGNC Symbol;Acc:HGNC:30832]	GeneBody	1203	-	0.885626	3.18	4.49	-1.31	0.0314	1
chr20:46165642-46166463	ENSG00000229957	AL031687.1	lncRNA	novel transcript	Terminator	823	-	-0.111111	2.94	4.36	-1.42	0.0316	1
chr8:135771202-135772183					Intergenic	983		0.417004	2.72	4.27	-1.55	0.0316	1
chr17:19927659-19928274	ENSG00000266126	AC005730.3	lncRNA	novel transcript	GeneBody,Terminator	617	-	0.0986842	3.82	1.98	1.85	0.0316	1
chr12:34268282-34269472					Intergenic	1192		-0.463602	3.56	4.93	-1.37	0.0317	1
chr7:28678412-28679041	ENSG00000146592	CREB5	protein_coding	cAMP responsive element binding protein 5 [Source:HGNC Symbol;Acc:HGNC:16844]	GeneBody	631	+	-0.0488889	3.84	2.16	1.68	0.0318	1
chr19:58326425-58327709	ENSG00000283103	AC010642.2	lncRNA	novel transcript, antisense to ERVK3-1	Promoter	1286	-	-0.0392902	4.09	5.35	-1.26	0.032	1
chr19:36400745-36401678	ENSG00000181007	ZFP82	protein_coding	ZFP82 zinc finger protein [Source:HGNC Symbol;Acc:HGNC:28682]	GeneBody	935	-	-0.405263	2.71	4.26	-1.54	0.032	1
chr5:130898509-130899387	ENSG00000287390	AC006525.1	lncRNA	novel transcript	GeneBody	880	-	0.0817942	2.34	-0.42	2.75	0.032	1
chr11:73597896-73598844	ENSG00000054965	FAM168A	protein_coding	family with sequence similarity 168 member A [Source:HGNC Symbol;Acc:HGNC:28999]	Promoter	950	-	-0.0636215	3.4	4.83	-1.43	0.0321	1
chr22:23969549-23970686	ENSG00000099974	DDTL	protein_coding	D-dopachrome tautomerase like [Source:HGNC Symbol;Acc:HGNC:33446]	Promoter,GeneBody,Terminator	1139	+	0.383764	3.73	4.89	-1.16	0.0321	1
chr11:73840520-73841096	ENSG00000175581	MRPL48	protein_coding	mitochondrial ribosomal protein L48 [Source:HGNC Symbol;Acc:HGNC:16653]	GeneBody	578	+	-0.0352941	3.99	2.16	1.83	0.0321	1
chr12:57115965-57117221					Intergenic	1258		0.103093	2.88	4.44	-1.56	0.0321	1
chr7:141335970-141337659	ENSG00000261115	TMEM178B	protein_coding	transmembrane protein 178B [Source:HGNC Symbol;Acc:HGNC:44112]	GeneBody	1691	+	-0.516624	3.33	4.57	-1.24	0.0322	1
chr2:98939524-98940420					Intergenic	898		-0.37415	2.45	4.05	-1.6	0.0322	1
chr22:41777653-41778319	ENSG00000167077	MEI1	protein_coding	meiotic double-stranded break formation protein 1 [Source:HGNC Symbol;Acc:HGNC:28613]	GeneBody	668	+	-0.381703	3.39	4.72	-1.33	0.0323	1
chr20:49548230-49549242	ENSG00000124212	PTGIS	protein_coding	prostaglandin I2 synthase [Source:HGNC Symbol;Acc:HGNC:9603]	GeneBody	1014	-	0.575342	3.52	5.02	-1.5	0.0325	1
chr3:112003574-112004370	ENSG00000144834	TAGLN3	protein_coding	transgelin 3 [Source:HGNC Symbol;Acc:HGNC:29868]	GeneBody	798	+	-0.012987	4.53	5.53	-1	0.0325	1
chr19:52628192-52629897	ENSG00000167766	ZNF83	protein_coding	zinc finger protein 83 [Source:HGNC Symbol;Acc:HGNC:13158]	GeneBody	1707	-	-0.381995	4.23	5.33	-1.11	0.0325	1
chr5:177475169-177476047	ENSG00000113758	DBN1	protein_coding	drebrin 1 [Source:HGNC Symbol;Acc:HGNC:2695]	Promoter	880	-	-0.26556	2.78	4.37	-1.59	0.0326	1
chr1:35370103-35370991	ENSG00000146463	ZMYM4	protein_coding	zinc finger MYM-type containing 4 [Source:HGNC Symbol;Acc:HGNC:13055]	GeneBody	890	+	-0.109677	4.15	2.57	1.58	0.0327	1
chr19:45873843-45876155	ENSG00000170608	FOXA3	protein_coding	forkhead box A3 [Source:HGNC Symbol;Acc:HGNC:5023]	Terminator	2314	+	0.0440678	4.72	5.68	-0.96	0.0329	1
chr2:69578671-69579375	ENSG00000115977	AAK1	protein_coding	AP2 associated kinase 1 [Source:HGNC Symbol;Acc:HGNC:19679]	GeneBody	706	-	-0.1875	1.96	3.73	-1.76	0.0329	1
chr17:9653284-9654031	ENSG00000154914	USP43	protein_coding	ubiquitin specific peptidase 43 [Source:HGNC Symbol;Acc:HGNC:20072]	GeneBody	749	+	0.221289	2.64	4.16	-1.52	0.0329	1
chr11:45316115-45316750					Intergenic	637		-0.0857143	4.3	2.88	1.42	0.033	1
chr9:132852629-132854109	ENSG00000165695	AK8	protein_coding	adenylate kinase 8 [Source:HGNC Symbol;Acc:HGNC:26526]	GeneBody	1482	-	0.170807	5.26	4.16	1.1	0.033	1
chr5:32494477-32494946					Intergenic	471		-0.038961	4.67	3.47	1.2	0.0331	1
chr20:25310213-25311093	ENSG00000100997	ABHD12	protein_coding	abhydrolase domain containing 12 [Source:HGNC Symbol;Acc:HGNC:15868]	GeneBody	882	-	0.157667	3.68	4.86	-1.18	0.0333	1
chr1:242074257-242075366					Intergenic	1111		0.245136	2.62	4.14	-1.52	0.0333	1
chr2:61795120-61795857					Intergenic	739		0.237333	3.13	4.4	-1.27	0.0333	1
chr2:99478994-99479835	ENSG00000135945	REV1	protein_coding	REV1 DNA directed polymerase [Source:HGNC Symbol;Acc:HGNC:14060]	GeneBody	843	-	0.0319149	4.28	2.73	1.56	0.0334	1
chr12:55817058-55818234	ENSG00000205323	SARNP	protein_coding	SAP domain containing ribonucleoprotein [Source:HGNC Symbol;Acc:HGNC:24432]	Promoter,GeneBody	1178	-	0.0673077	3.22	4.56	-1.34	0.0334	1
chr14:69712578-69713171	ENSG00000100647	SUSD6	protein_coding	sushi domain containing 6 [Source:HGNC Symbol;Acc:HGNC:19956]	GeneBody	595	+	-0.0967742	1.81	3.83	-2.02	0.0334	1
chr1:26917896-26919079					Intergenic	1185		-0.159213	4.36	2.98	1.39	0.0334	1
chrX:150604147-150605014	ENSG00000171100	MTM1	protein_coding	myotubularin 1 [Source:HGNC Symbol;Acc:HGNC:7448]	GeneBody	869	+	-0.389671	3.25	4.51	-1.25	0.0337	1
chr1:214526710-214527149	ENSG00000152104	PTPN14	protein_coding	protein tyrosine phosphatase non-receptor type 14 [Source:HGNC Symbol;Acc:HGNC:9647]	GeneBody	441	-	0.209302	2.58	4.14	-1.56	0.0339	1
chr2:217684548-217685814					Intergenic	1268		0.167883	3.01	4.51	-1.5	0.0339	1
chr12:6765095-6766365	ENSG00000159335	PTMS	protein_coding	parathymosin [Source:HGNC Symbol;Acc:HGNC:9629]	Promoter	1272	+	-0.029453	4.41	5.38	-0.97	0.0339	1
chr2:61572234-61573038					Intergenic	806		-0.0619946	4.57	3.12	1.45	0.0339	1
chr13:51887756-51888650					Intergenic	896		-0.253968	2.85	4.33	-1.48	0.034	1
chr13:49284949-49285814	ENSG00000102543	CDADC1	protein_coding	cytidine and dCMP deaminase domain containing 1 [Source:HGNC Symbol;Acc:HGNC:20299]	GeneBody	867	+	-0.0747126	4.41	2.85	1.56	0.034	1
chr4:140039547-140040123	ENSG00000196782	MAML3	protein_coding	mastermind like transcriptional coactivator 3 [Source:HGNC Symbol;Acc:HGNC:16272]	GeneBody	578	-	-0.0647482	1.91	3.83	-1.91	0.0341	1
chr6:108734998-108736727					Intergenic	1731		0.0671642	3.66	4.93	-1.27	0.0341	1
chr9:129395017-129397687					Intergenic	2672		0.892456	5.58	6.57	-0.99	0.0342	1
chr17:6918964-6919810					Intergenic	848		-0.388601	1.98	3.88	-1.9	0.0342	1
chr2:223091837-223092615					Intergenic	780		-0.229551	3.07	4.45	-1.38	0.0343	1
chr22:38279780-38280684					Intergenic	906		-0.110577	4.81	3.66	1.14	0.0343	1
chr1:174634710-174638858	ENSG00000152061	RABGAP1L	protein_coding	RAB GTPase activating protein 1 like [Source:HGNC Symbol;Acc:HGNC:24663]	GeneBody	4150	+	0.0301407	2.27	-0.42	2.68	0.0344	1
chr10:47742663-47743909					Intergenic	1248		0.0547945	3.75	1.74	2.01	0.0345	1
chr17:59016176-59016822	ENSG00000108395	TRIM37	protein_coding	tripartite motif containing 37 [Source:HGNC Symbol;Acc:HGNC:7523]	GeneBody	648	-	0.0666667	4.11	2.13	1.99	0.0345	1
chr12:108981822-108983493	ENSG00000166111	SVOP	protein_coding	SV2 related protein [Source:HGNC Symbol;Acc:HGNC:25417]	GeneBody	1673	-	-0.822157	3.47	4.96	-1.49	0.0345	1
chr8:143025971-143027239					Intergenic	1270		0.084088	3.16	4.74	-1.58	0.0346	1
chr2:74620932-74621608	ENSG00000159374	M1AP	protein_coding	meiosis 1 associated protein [Source:HGNC Symbol;Acc:HGNC:25183]	GeneBody	678	-	0.0878187	3.44	1.08	2.35	0.0348	1
chr10:28434817-28435287	ENSG00000237128	LINC02652	lncRNA	long intergenic non-protein coding RNA 2652 [Source:HGNC Symbol;Acc:HGNC:54137]	GeneBody	472	-	-0.12037	3.97	2.35	1.62	0.0349	1
chr1:173868002-173868877	ENSG00000234741	GAS5	lncRNA	growth arrest specific 5 [Source:HGNC Symbol;Acc:HGNC:16355]	Promoter	877	-	-0.20678	3.04	4.7	-1.66	0.0349	1
chr19:53030569-53031656					Intergenic	1089		-0.0461538	5.32	4.14	1.18	0.0351	1
chr14:50841283-50842128					Intergenic	847		0.183246	4.29	2.58	1.71	0.0351	1
chr12:95796932-95797453	ENSG00000258343	AC090001.1	lncRNA	novel transcript	GeneBody	523	-	0.423581	1.89	3.73	-1.84	0.0352	1
chr22:38569999-38570930	ENSG00000100206	DMC1	protein_coding	DNA meiotic recombinase 1 [Source:HGNC Symbol;Acc:HGNC:2927]	Promoter	933	-	0.178451	3.49	5.04	-1.56	0.0353	1
chr11:61382239-61383338					Intergenic	1101		0.0205761	4.37	3.04	1.32	0.0353	1
chr12:49127888-49128886	ENSG00000123416	TUBA1B	protein_coding	tubulin alpha 1b [Source:HGNC Symbol;Acc:HGNC:18809]	GeneBody,Terminator	1000	-	0.0496183	5.6	4.6	1.01	0.0353	1
chr12:32416474-32416906					Intergenic	434		-0.157895	4.14	2.67	1.47	0.0356	1
chr19:57010619-57011861					Intergenic	1244		-0.362776	4.67	5.64	-0.97	0.0357	1
chr3:155805036-155806013	ENSG00000174928	C3orf33	protein_coding	chromosome 3 open reading frame 33 [Source:HGNC Symbol;Acc:HGNC:26434]	Promoter,GeneBody	979	-	-0.0479846	2.91	4.38	-1.47	0.0358	1
chr7:75779163-75781123	ENSG00000006606	CCL26	protein_coding	C-C motif chemokine ligand 26 [Source:HGNC Symbol;Acc:HGNC:10625]	GeneBody	1962	-	-0.384921	4.15	5.27	-1.12	0.0358	1
chr5:168675340-168676437	ENSG00000184347	SLIT3	protein_coding	slit guidance ligand 3 [Source:HGNC Symbol;Acc:HGNC:11087]	GeneBody	1099	-	-0.220676	3.36	4.88	-1.52	0.0358	1
chr10:75108746-75109671	ENSG00000156671	SAMD8	protein_coding	sterile alpha motif domain containing 8 [Source:HGNC Symbol;Acc:HGNC:26320]	Promoter	927	+	-0.0711462	3.65	4.78	-1.13	0.0359	1
chr22:41784891-41786391	ENSG00000167077	MEI1	protein_coding	meiotic double-stranded break formation protein 1 [Source:HGNC Symbol;Acc:HGNC:28613]	GeneBody	1502	+	-0.0777626	5.24	3.82	1.41	0.036	1
chr7:45696028-45696800	ENSG00000164742	ADCY1	protein_coding	adenylate cyclase 1 [Source:HGNC Symbol;Acc:HGNC:232]	GeneBody	774	+	0	3.82	1.92	1.9	0.036	1
chr19:9873320-9874328	ENSG00000105088	OLFM2	protein_coding	olfactomedin 2 [Source:HGNC Symbol;Acc:HGNC:17189]	GeneBody	1010	-	-0.142857	4.66	3.31	1.35	0.0361	1
chr7:4680714-4681716	ENSG00000164916	FOXK1	protein_coding	forkhead box K1 [Source:HGNC Symbol;Acc:HGNC:23480]	Promoter	1004	+	0.580392	4.31	5.31	-1	0.0361	1
chr20:45549810-45550655	ENSG00000158901	WFDC8	protein_coding	WAP four-disulfide core domain 8 [Source:HGNC Symbol;Acc:HGNC:16163]	Terminator	847	-	0.497326	3.73	4.95	-1.22	0.0364	1
chr13:49606409-49607187					Intergenic	780		0.0847458	3.11	4.39	-1.29	0.0366	1
chr14:34463406-34463962	ENSG00000165389	SPTSSA	protein_coding	serine palmitoyltransferase small subunit A [Source:HGNC Symbol;Acc:HGNC:20361]	Promoter	558	-	0.286275	2.94	4.29	-1.35	0.0368	1
chr17:10190476-10191681	ENSG00000007237	GAS7	protein_coding	growth arrest specific 7 [Source:HGNC Symbol;Acc:HGNC:4169]	GeneBody	1207	-	0.133672	4.91	3.78	1.12	0.0368	1
chr5:168538162-168539196					Intergenic	1036		-0.25	3.13	4.59	-1.46	0.0368	1
chr3:146354265-146354940					Intergenic	677		-0.424149	1.48	3.79	-2.31	0.0369	1
chr4:40293790-40295951					Intergenic	2163		-0.725067	5	5.97	-0.97	0.037	1
chr17:26810086-26810938					Intergenic	854		0.6375	1.81	3.79	-1.98	0.037	1
chr7:143284538-143285722	ENSG00000178826	TMEM139	protein_coding	transmembrane protein 139 [Source:HGNC Symbol;Acc:HGNC:22058]	Promoter,GeneBody	1186	+	0.166154	2.67	4.4	-1.73	0.0371	1
chr7:2345537-2346301					Intergenic	766		0.026087	2.49	4.09	-1.6	0.0371	1
chr10:99508377-99509445					Intergenic	1070		0	4.59	3.3	1.29	0.0372	1
chr20:28888906-28890139					Intergenic	1235		-0.667283	4.29	5.39	-1.11	0.0372	1
chr15:74354533-74355069	ENSG00000140459	CYP11A1	protein_coding	cytochrome P450 family 11 subfamily A member 1 [Source:HGNC Symbol;Acc:HGNC:2590]	GeneBody	538	-	-0.303704	1.46	3.59	-2.13	0.0373	1
chr20:365074-365865					Intergenic	793		0.0439024	3.65	4.9	-1.25	0.0374	1
chr2:222756107-222756919					Intergenic	814		-0.247368	3.71	4.83	-1.12	0.0374	1
chr7:132607645-132608198					Intergenic	555		-0.747036	1.55	3.46	-1.91	0.0375	1
chr2:151132481-151133680	ENSG00000236885	AC018731.1	lncRNA	novel transcript	GeneBody	1201	-	0.11546	4.35	3.03	1.31	0.0375	1
chr3:179562702-179563142	ENSG00000136518	ACTL6A	protein_coding	actin like 6A [Source:HGNC Symbol;Acc:HGNC:24124]	Promoter	442	+	0.0313589	2.37	4.19	-1.82	0.0375	1
chr3:107105638-107106703	ENSG00000242759	LINC00882	lncRNA	long intergenic non-protein coding RNA 882 [Source:HGNC Symbol;Acc:HGNC:48568]	GeneBody	1067	-	-0.0447154	4.91	5.84	-0.93	0.0376	1
chr5:3077268-3078164					Intergenic	898		0.303419	3.39	4.57	-1.18	0.0376	1
chr9:105030867-105031646	ENSG00000286536	AL591506.1	lncRNA	novel transcript	GeneBody	781	-	-0.121951	2.83	4.3	-1.47	0.0376	1
chr1:54483676-54484326					Intergenic	652		0.311475	2.72	4.15	-1.43	0.0377	1
chr5:22244540-22245062	ENSG00000154162	CDH12	protein_coding	cadherin 12 [Source:HGNC Symbol;Acc:HGNC:1751]	GeneBody	524	-	0.617391	5.04	4.01	1.03	0.0377	1
chr20:51122192-51122713					Intergenic	523		-0.151751	2.92	4.33	-1.41	0.0377	1
chr6:15219929-15220915					Intergenic	988		-0.0334728	4.34	2.74	1.6	0.0378	1
chr8:125802313-125803164	ENSG00000286122	AC016074.2	lncRNA	novel transcript	GeneBody	853	+	0.53317	3.34	4.57	-1.23	0.0378	1
chr8:127998347-127998910	ENSG00000249859	PVT1	lncRNA	Pvt1 oncogene [Source:HGNC Symbol;Acc:HGNC:9709]	GeneBody	565	+	-0.729258	4.61	3.46	1.15	0.0378	1
chr3:184694501-184695459					Intergenic	960		-0.332016	3.02	4.35	-1.33	0.0378	1
chr2:120668655-120669611					Intergenic	958		-0.128	2.93	4.32	-1.39	0.0379	1
chr2:106570645-106571241					Intergenic	598		0.139241	2.67	4.15	-1.48	0.038	1
chr19:10934247-10934888					Intergenic	643		0	4.13	2.55	1.57	0.0381	1
chr9:90946695-90947285					Intergenic	592		0.137255	2.48	4.17	-1.69	0.0381	1
chr1:231623335-231624273	ENSG00000270106	TSNAX-DISC1	protein_coding	TSNAX-DISC1 readthrough (NMD candidate) [Source:HGNC Symbol;Acc:HGNC:49177]	GeneBody	940	+	0.438095	3.91	4.97	-1.06	0.0381	1
chr12:4846500-4846953					Intergenic	455		-0.257143	4.12	2.49	1.62	0.0383	1
chr19:13395143-13395831	ENSG00000141837	CACNA1A	protein_coding	calcium voltage-gated channel subunit alpha1 A [Source:HGNC Symbol;Acc:HGNC:1388]	GeneBody	690	-	0.0718563	4.13	2.63	1.5	0.0383	1
chr16:5454562-5455276					Intergenic	716		-0.437956	4.36	3.1	1.26	0.0383	1
chr2:120237250-120239403					Intergenic	2155		0.0431948	4.54	5.65	-1.11	0.0385	1
chr3:147364843-147365422	ENSG00000243620	AC092957.1	lncRNA	novel transcript	Terminator	581	-	0.582418	3.4	4.59	-1.19	0.0385	1
chr1:120850051-120850913	ENSG00000287979	AC253572.2	lncRNA	novel transcript	Promoter	864	-	-0.0348028	1.38	3.34	-1.97	0.0386	1
chr1:204385646-204386245	ENSG00000226330	AL606489.1	lncRNA	novel transcript	GeneBody	601	+	-0.475655	2.7	4.34	-1.64	0.0386	1
chr19:40238014-40238572	ENSG00000105221	AKT2	protein_coding	AKT serine/threonine kinase 2 [Source:HGNC Symbol;Acc:HGNC:392]	GeneBody	560	-	0.129909	2.13	3.91	-1.78	0.0387	1
chr8:22707671-22708964					Intergenic	1295		-0.00643087	2.55	4.3	-1.75	0.0387	1
chr14:23110436-23111566					Intergenic	1132		0.0506567	3.35	4.6	-1.26	0.0389	1
chr19:52695007-52695835					Intergenic	830		-0.0354223	5.11	3.87	1.24	0.0389	1
chr21:10712979-10719478					Intergenic	6501		-0.781572	5.85	6.75	-0.9	0.039	1
chr9:15126743-15127171					Intergenic	430		0.495327	1.27	3.35	-2.08	0.0391	1
chr8:130482319-130484049					Intergenic	1732		0.0815348	3.89	5.09	-1.2	0.0394	1
chr9:109217961-109218699	ENSG00000095203	EPB41L4B	protein_coding	erythrocyte membrane protein band 4.1 like 4B [Source:HGNC Symbol;Acc:HGNC:19818]	GeneBody	740	-	-0.312676	3.11	4.46	-1.35	0.0394	1
chr1:229248925-229250183	ENSG00000177800	TMEM78	lncRNA	transmembrane protein 78 [Source:HGNC Symbol;Acc:HGNC:32307]	Promoter	1260	+	-0.0734824	4.5	5.49	-0.98	0.0394	1
chr1:154908559-154909419					Intergenic	862		0.198198	3.19	4.53	-1.33	0.0396	1
chr6:34787127-34787748					Intergenic	623		0.0541516	1.82	3.62	-1.8	0.0397	1
chrX:122222601-122223365					Intergenic	766		-0.409669	2.53	4.11	-1.59	0.0398	1
chr3:141695253-141695926					Intergenic	675		0.446809	3.55	4.71	-1.16	0.0398	1
chr10:84240441-84241026	ENSG00000148602	LRIT1	protein_coding	leucine rich repeat, Ig-like and transmembrane domains 1 [Source:HGNC Symbol;Acc:HGNC:23404]	Promoter,GeneBody	587	-	0.458484	2.39	4.06	-1.67	0.0399	1
chr21:10679804-10680559					Intergenic	757		-0.717105	1.17	3.34	-2.17	0.0401	1
chr10:3663080-3663801					Intergenic	723		-0.19898	1.86	3.69	-1.83	0.0401	1
chr12:132699377-132700121	ENSG00000176894	PXMP2	protein_coding	peroxisomal membrane protein 2 [Source:HGNC Symbol;Acc:HGNC:9716]	GeneBody	746	+	0.0492754	3.02	4.32	-1.3	0.0401	1
chr6:37115930-37117090					Intergenic	1162		0.0487805	4.92	3.75	1.17	0.0402	1
chr19:45423518-45423912	ENSG00000012061	ERCC1	protein_coding	ERCC excision repair 1, endonuclease non-catalytic subunit [Source:HGNC Symbol;Acc:HGNC:3433]	Promoter	396	-	-0.261194	1.83	3.69	-1.86	0.0402	1
chr14:45288630-45289306					Intergenic	678		0.165605	4.25	2.93	1.31	0.0403	1
chr12:117395806-117396474					Intergenic	670		-0.303226	2.93	4.28	-1.35	0.0403	1
chr20:3197940-3199170	ENSG00000198171	DDRGK1	protein_coding	DDRGK domain containing 1 [Source:HGNC Symbol;Acc:HGNC:16110]	GeneBody	1232	-	0.116279	5.55	4.51	1.04	0.0404	1
chr2:23995840-23996846	ENSG00000173960	UBXN2A	protein_coding	UBX domain protein 2A [Source:HGNC Symbol;Acc:HGNC:27265]	GeneBody	1008	+	-0.106754	4.84	3.69	1.15	0.0404	1
chr1:173069101-173069765					Intergenic	666		-0.128788	0.63	3.08	-2.45	0.0405	1
chr11:71439911-71441225	ENSG00000172893	DHCR7	protein_coding	7-dehydrocholesterol reductase [Source:HGNC Symbol;Acc:HGNC:2860]	GeneBody	1316	-	0.372928	4.23	5.22	-0.99	0.0406	1
chr14:39517725-39522469	ENSG00000258526	AL049828.1	lncRNA	novel transcript	GeneBody	4746	+	0.00970874	2.17	-0.42	2.58	0.0406	1
chr3:142827005-142827628	ENSG00000163710	PCOLCE2	protein_coding	procollagen C-endopeptidase enhancer 2 [Source:HGNC Symbol;Acc:HGNC:8739]	GeneBody	625	-	-0.0634441	-0.24	2.4	-2.64	0.0407	1
chr3:107570450-107571718	ENSG00000114439	BBX	protein_coding	BBX high mobility group box domain containing [Source:HGNC Symbol;Acc:HGNC:14422]	GeneBody	1270	+	0.363924	5.63	6.44	-0.81	0.0407	1
chr22:30378999-30379999	ENSG00000099999	RNF215	protein_coding	ring finger protein 215 [Source:HGNC Symbol;Acc:HGNC:33434]	GeneBody,Terminator	1002	-	-0.00657895	4.43	2.95	1.48	0.0407	1
chr2:212757482-212758113	ENSG00000273118	AC093865.1	lncRNA	novel transcript, sense overlapping IKZF2	GeneBody	633	-	0.0294118	0.24	2.76	-2.52	0.0408	1
chr20:57894354-57895044					Intergenic	692		0.688022	3.18	4.43	-1.25	0.0408	1
chr14:20704244-20705025	ENSG00000258451	EGILA	lncRNA	EGFR interacting lncRNA [Source:HGNC Symbol;Acc:HGNC:54482]	GeneBody	783	-	-0.36	2.5	4.13	-1.63	0.0409	1
chr1:30197724-30198553					Intergenic	831		0.607843	3.24	4.54	-1.3	0.0411	1
chr10:43446621-43447983	ENSG00000243660	ZNF487	protein_coding	zinc finger protein 487 [Source:HGNC Symbol;Acc:HGNC:23488]	GeneBody	1364	+	0.0550336	3.18	4.48	-1.31	0.0413	1
chr3:10368345-10369193	ENSG00000157087	ATP2B2	protein_coding	ATPase plasma membrane Ca2+ transporting 2 [Source:HGNC Symbol;Acc:HGNC:815]	GeneBody	850	-	-0.542579	3.33	4.66	-1.32	0.0413	1
chr3:185547564-185549116	ENSG00000163898	LIPH	protein_coding	lipase H [Source:HGNC Symbol;Acc:HGNC:18483]	GeneBody	1554	-	0.0787097	5.45	4.33	1.13	0.0415	1
chr19:53570528-53570994	ENSG00000130844	ZNF331	protein_coding	zinc finger protein 331 [Source:HGNC Symbol;Acc:HGNC:15489]	GeneBody	468	+	-0.159184	4.55	3.21	1.34	0.0415	1
chr6:31710543-31711271	ENSG00000204424	LY6G6F	protein_coding	lymphocyte antigen 6 family member G6F [Source:HGNC Symbol;Acc:HGNC:13933]	GeneBody,Terminator	730	+	0.203046	2.58	4.15	-1.57	0.0417	1
chr3:177330012-177330592					Intergenic	582		0.0283688	2	3.81	-1.81	0.0418	1
chr20:56787002-56787622					Intergenic	622		-0.0599369	2.43	4.09	-1.65	0.0418	1
chr7:105329137-105330433	ENSG00000135250	SRPK2	protein_coding	SRSF protein kinase 2 [Source:HGNC Symbol;Acc:HGNC:11306]	GeneBody	1298	-	0.0413793	4.15	2.22	1.93	0.0418	1
chr10:80608734-80609884	ENSG00000178217	SH2D4B	protein_coding	SH2 domain containing 4B [Source:HGNC Symbol;Acc:HGNC:31440]	GeneBody	1152	+	-0.123377	4.03	5.15	-1.12	0.0419	1
chr19:47303847-47304918					Intergenic	1073		0.00199601	4.69	3.46	1.23	0.0419	1
chr17:47940994-47941770	ENSG00000234494	SP2-AS1	lncRNA	SP2 antisense RNA 1 [Source:HGNC Symbol;Acc:HGNC:51341]	Promoter	778	-	-0.275556	3.2	4.53	-1.33	0.042	1
chr1:215414454-215414903					Intergenic	451		0.485232	1.4	3.42	-2.01	0.042	1
chr20:45253276-45254492	ENSG00000124107	SLPI	protein_coding	secretory leukocyte peptidase inhibitor [Source:HGNC Symbol;Acc:HGNC:11092]	Promoter,GeneBody	1218	-	-0.00311526	3.77	4.83	-1.06	0.042	1
chr2:170828293-170829312	ENSG00000128683	GAD1	protein_coding	glutamate decarboxylase 1 [Source:HGNC Symbol;Acc:HGNC:4092]	GeneBody	1021	+	-0.582237	3.72	4.8	-1.08	0.042	1
chr12:100183902-100184368					Intergenic	468		0.299363	3.06	0.82	2.24	0.042	1
chr11:72843248-72843887	ENSG00000137478	FCHSD2	protein_coding	FCH and double SH3 domains 2 [Source:HGNC Symbol;Acc:HGNC:29114]	GeneBody	641	-	-0.0125523	1.09	3.24	-2.15	0.0421	1
chr1:229221369-229222381	ENSG00000233920	AL162595.2	lncRNA	novel transcript	Terminator	1014	-	-0.0933333	4.39	5.36	-0.97	0.0421	1
chrX:63755022-63755918	ENSG00000131089	ARHGEF9	protein_coding	Cdc42 guanine nucleotide exchange factor 9 [Source:HGNC Symbol;Acc:HGNC:14561]	Promoter	898	-	0.106472	4.83	5.76	-0.94	0.0422	1
chr9:109767664-109768125	ENSG00000232939	AL158829.1	lncRNA	novel transcript	GeneBody	463	-	0.292035	2.64	4.38	-1.74	0.0423	1
chr2:240041779-240042918					Intergenic	1141		0.564964	2.12	-0.42	2.53	0.0425	1
chr16:4172768-4173523					Intergenic	757		-0.157895	4.53	3.2	1.32	0.0426	1
chr11:57781493-57781975	ENSG00000254732	AP001931.1	protein_coding	novel protein, C11orf31-CTNND1 readthrough	GeneBody	484	+	0.00411523	2.31	4.05	-1.74	0.0426	1
chr3:159928553-159930014	ENSG00000244040	IL12A-AS1	lncRNA	IL12A antisense RNA 1 [Source:HGNC Symbol;Acc:HGNC:49094]	GeneBody	1463	-	0.157143	3.41	4.85	-1.44	0.0426	1
chr7:159106301-159107126	ENSG00000287184	AC007269.1	lncRNA	novel transcript, antisense to VIPR2	Promoter,GeneBody	827	+	0.456604	2.65	4.19	-1.53	0.0429	1
chr3:162726763-162727138					Intergenic	377		0.395349	1.38	3.45	-2.08	0.0429	1
chr3:6398436-6399280					Intergenic	846		-0.404255	3.05	4.52	-1.47	0.0429	1
chr20:2711955-2712647	ENSG00000088881	EBF4	protein_coding	EBF family member 4 [Source:HGNC Symbol;Acc:HGNC:29278]	GeneBody	694	+	0.386997	2.19	4.12	-1.92	0.043	1
chrX:121346912-121348426					Intergenic	1516		0.414508	3.58	4.68	-1.11	0.043	1
chr16:9949220-9950004	ENSG00000183454	GRIN2A	protein_coding	glutamate ionotropic receptor NMDA type subunit 2A [Source:HGNC Symbol;Acc:HGNC:4585]	GeneBody	786	-	0.633952	2.48	4.1	-1.62	0.0433	1
chr10:38911618-38913376					Intergenic	1760		0.812183	4.91	5.82	-0.91	0.0433	1
chr10:103962453-103963304					Intergenic	853		0.0187668	1.4	3.4	-2	0.0433	1
chr2:24896194-24897968	ENSG00000138031	ADCY3	protein_coding	adenylate cyclase 3 [Source:HGNC Symbol;Acc:HGNC:234]	GeneBody	1776	-	-0.211628	3.75	4.86	-1.11	0.0433	1
chr20:44352025-44352538	ENSG00000101074	R3HDML	protein_coding	R3H domain containing like [Source:HGNC Symbol;Acc:HGNC:16249]	GeneBody,Terminator	515	+	-0.193798	1.96	3.75	-1.79	0.0434	1
chr10:75028603-75029168	ENSG00000156650	KAT6B	protein_coding	lysine acetyltransferase 6B [Source:HGNC Symbol;Acc:HGNC:17582]	GeneBody	567	+	0.261649	3.09	4.49	-1.4	0.0436	1
chrX:3075482-3076984	ENSG00000062096	ARSF	protein_coding	arylsulfatase F [Source:HGNC Symbol;Acc:HGNC:721]	GeneBody	1504	+	-0.412088	5.31	4.37	0.94	0.0437	1
chr16:23365145-23365813	ENSG00000168447	SCNN1B	protein_coding	sodium channel epithelial 1 subunit beta [Source:HGNC Symbol;Acc:HGNC:10600]	GeneBody	670	+	0.408451	4.75	3.58	1.18	0.0437	1
chr8:115768440-115769223					Intergenic	785		-0.705426	3.32	4.59	-1.28	0.0438	1
chr7:90119591-90120310	ENSG00000238358	AC004969.1	lncRNA	novel transcript	GeneBody,Terminator	721	-	0.291892	2.06	3.77	-1.71	0.0438	1
chr8:94640636-94641404	ENSG00000261437	AC108860.2	lncRNA	novel transcript, antisense to ESRP1	Promoter	770	-	-0.207469	3.5	4.73	-1.23	0.0438	1
chr5:51179308-51179760					Intergenic	454		-0.376884	1.87	3.65	-1.77	0.0438	1
chr7:58091326-58091778					Intergenic	454		0.235849	1.63	3.55	-1.93	0.0439	1
chr9:111004702-111005898	ENSG00000198121	LPAR1	protein_coding	lysophosphatidic acid receptor 1 [Source:HGNC Symbol;Acc:HGNC:3166]	GeneBody	1198	-	-0.0827068	2.96	4.32	-1.36	0.0439	1
chr14:34960664-34962138					Intergenic	1476		0.0695652	5.43	4.25	1.18	0.0439	1
chr20:36416859-36419322	ENSG00000080845	DLGAP4	protein_coding	DLG associated protein 4 [Source:HGNC Symbol;Acc:HGNC:24476]	GeneBody	2465	+	0.0408163	5.37	4.16	1.2	0.044	1
chr22:48858611-48859273					Intergenic	664		-0.688474	1.34	3.38	-2.04	0.044	1
chr22:38044144-38045163	ENSG00000273214	AL031587.4	lncRNA	novel transcript	Terminator	1021	+	-0.0450098	4.48	3.23	1.25	0.044	1
chr5:62653896-62654563					Intergenic	669		-0.173502	4.4	3.1	1.3	0.0441	1
chr9:137242550-137243686	ENSG00000188229	TUBB4B	protein_coding	tubulin beta 4B class IVb [Source:HGNC Symbol;Acc:HGNC:20771]	GeneBody,Terminator	1138	+	-0.00909091	5.22	4.01	1.21	0.0442	1
chr3:158756293-158756700					Intergenic	409		-0.108108	4.37	3.11	1.26	0.0444	1
chr19:53035877-53037426					Intergenic	1551		-0.235751	5.19	6.05	-0.86	0.0445	1
chr14:77199112-77200224	ENSG00000259164	AC007375.2	protein_coding	novel protein	GeneBody	1114	+	-0.09699	4.03	5.28	-1.25	0.0446	1
chr14:49746322-49747340	ENSG00000197776	KLHDC1	protein_coding	kelch domain containing 1 [Source:HGNC Symbol;Acc:HGNC:19836]	GeneBody	1020	+	-0.163561	3.33	4.54	-1.2	0.0446	1
chr22:30457064-30458226	ENSG00000100012	SEC14L3	protein_coding	SEC14 like lipid binding 3 [Source:HGNC Symbol;Acc:HGNC:18655]	Terminator	1164	-	-0.147368	3.8	4.84	-1.03	0.0449	1
chr19:42178641-42179546					Intergenic	907		0.448852	3.68	4.87	-1.19	0.0449	1
chr3:124467473-124467941	ENSG00000160145	KALRN	protein_coding	kalirin RhoGEF kinase [Source:HGNC Symbol;Acc:HGNC:4814]	GeneBody	470	+	0.532468	2.89	4.26	-1.37	0.045	1
chr2:120574506-120574981					Intergenic	477		-0.335821	2.48	4	-1.52	0.045	1
chr2:119105242-119106049					Intergenic	809		-0.273713	3.51	4.73	-1.22	0.045	1
chr6:10464547-10465308					Intergenic	763		-0.358696	2.86	4.17	-1.31	0.045	1
chr10:69369282-69369917	ENSG00000156515	HK1	protein_coding	hexokinase 1 [Source:HGNC Symbol;Acc:HGNC:4922]	GeneBody	637	+	0.0410095	2.86	4.28	-1.43	0.0451	1
chr20:49968203-49969061					Intergenic	860		0.214458	4.1	5.13	-1.03	0.0453	1
chr3:13117292-13117961					Intergenic	671		0.0705882	4.31	2.7	1.61	0.0453	1
chr12:121612229-121613145					Intergenic	918		-0.147059	4.82	3.58	1.24	0.0454	1
chr4:7613531-7615295	ENSG00000184985	SORCS2	protein_coding	sortilin related VPS10 domain containing receptor 2 [Source:HGNC Symbol;Acc:HGNC:16698]	GeneBody	1766	+	-0.746411	4.41	5.38	-0.96	0.0455	1
chr1:154995616-154996362	ENSG00000163352	LENEP	protein_coding	lens epithelial protein [Source:HGNC Symbol;Acc:HGNC:14429]	Terminator	748	+	0.203822	4.04	2.61	1.43	0.0455	1
chr3:196325160-196325640	ENSG00000235897	TM4SF19-AS1	lncRNA	TM4SF19 antisense RNA 1 [Source:HGNC Symbol;Acc:HGNC:41085]	GeneBody,Terminator	482	+	-0.213675	2.29	3.84	-1.55	0.0456	1
chr14:60273574-60274410	ENSG00000100614	PPM1A	protein_coding	protein phosphatase, Mg2+/Mn2+ dependent 1A [Source:HGNC Symbol;Acc:HGNC:9275]	GeneBody	838	+	0.344173	3.16	4.42	-1.26	0.0456	1
chr22:24935776-24936646	ENSG00000206069	TMEM211	protein_coding	transmembrane protein 211 [Source:HGNC Symbol;Acc:HGNC:33725]	GeneBody,Terminator	872	-	-0.70235	3.81	4.95	-1.15	0.0456	1
chr7:2856350-2857281					Intergenic	933		-0.0957684	2.43	3.99	-1.56	0.0457	1
chr10:60502408-60503209					Intergenic	803		0.322785	5.36	4.33	1.03	0.0458	1
chr14:63867400-63867967	ENSG00000054654	SYNE2	protein_coding	spectrin repeat containing nuclear envelope protein 2 [Source:HGNC Symbol;Acc:HGNC:17084]	GeneBody	569	+	0.117438	3.12	4.47	-1.35	0.0458	1
chr12:5851410-5852294	ENSG00000047617	ANO2	protein_coding	anoctamin 2 [Source:HGNC Symbol;Acc:HGNC:1183]	GeneBody	886	-	0.239024	4.63	3.5	1.12	0.0458	1
chr19:32391964-32392595	ENSG00000267213	AC007773.1	lncRNA	novel transcript, antisense to DPY19L3	GeneBody	633	-	0.56051	2.84	4.31	-1.47	0.0459	1
chr18:49618547-49619149					Intergenic	604		0.119718	1.66	3.53	-1.87	0.0461	1
chr2:231560545-231561429					Intergenic	886		0.0652742	4.29	2.83	1.46	0.0461	1
chr16:30158442-30160340					Intergenic	1900		0.0112821	5.39	4.39	1	0.0463	1
chr5:178305167-178306204	ENSG00000050767	COL23A1	protein_coding	collagen type XXIII alpha 1 chain [Source:HGNC Symbol;Acc:HGNC:22990]	GeneBody	1039	-	0.299509	3.56	4.8	-1.24	0.0465	1
chr3:119796283-119796825	ENSG00000285585	AC069444.2	protein_coding	novel protein	GeneBody	544	+	-0.405594	2.89	4.33	-1.44	0.0467	1
chr6:32180341-32180939	ENSG00000204305	AGER	protein_coding	advanced glycosylation end-product specific receptor [Source:HGNC Symbol;Acc:HGNC:320]	Terminator	600	-	-0.0716724	0.6	2.8	-2.2	0.0468	1
chr2:57229786-57230716					Intergenic	932		-0.358974	2.12	3.85	-1.73	0.0468	1
chr8:116175613-116176619	ENSG00000249917	LINC00536	lncRNA	long intergenic non-protein coding RNA 536 [Source:HGNC Symbol;Acc:HGNC:43645]	GeneBody	1008	-	0.90799	5.74	4.79	0.94	0.0469	1
chr2:9251380-9251932	ENSG00000151693	ASAP2	protein_coding	ArfGAP with SH3 domain, ankyrin repeat and PH domain 2 [Source:HGNC Symbol;Acc:HGNC:2721]	GeneBody	554	+	0.266436	2.67	4.27	-1.6	0.047	1
chr11:66574432-66575022					Intergenic	592		-0.365696	2.6	4.24	-1.64	0.047	1
chr3:8964539-8965098	ENSG00000070950	RAD18	protein_coding	RAD18 E3 ubiquitin protein ligase [Source:HGNC Symbol;Acc:HGNC:18278]	Promoter	561	-	0.230189	2.46	4.06	-1.6	0.0471	1
chr19:41925331-41925865	ENSG00000268041	ERFL	protein_coding	ETS repressor factor like [Source:HGNC Symbol;Acc:HGNC:53894]	GeneBody	536	-	0.446043	2.45	3.94	-1.49	0.0471	1
chr5:80257025-80257536	ENSG00000164300	SERINC5	protein_coding	serine incorporator 5 [Source:HGNC Symbol;Acc:HGNC:18825]	Promoter	513	-	0.0526316	1.94	3.68	-1.74	0.0472	1
chr19:35652222-35653566	ENSG00000126267	COX6B1	protein_coding	cytochrome c oxidase subunit 6B1 [Source:HGNC Symbol;Acc:HGNC:2280]	GeneBody	1346	+	-0.121662	4.89	3.56	1.32	0.0472	1
chr16:30806134-30808410					Intergenic	2278		-0.0755396	4.52	5.45	-0.93	0.0472	1
chr5:173874628-173875566					Intergenic	940		-0.0707547	4.08	2.54	1.54	0.0473	1
chr2:38087446-38088134	ENSG00000232973	CYP1B1-AS1	lncRNA	CYP1B1 antisense RNA 1 [Source:HGNC Symbol;Acc:HGNC:28543]	GeneBody	690	+	-0.170279	2.6	4.13	-1.52	0.0473	1
chr1:234416469-234417014	ENSG00000059588	TARBP1	protein_coding	TAR (HIV-1) RNA binding protein 1 [Source:HGNC Symbol;Acc:HGNC:11568]	GeneBody	547	-	0.182879	2.69	4.12	-1.42	0.0477	1
chr1:148493937-148494635					Intergenic	700		-0.388489	4.64	3.48	1.16	0.0477	1
chr10:91286122-91286489	ENSG00000180628	PCGF5	protein_coding	polycomb group ring finger 5 [Source:HGNC Symbol;Acc:HGNC:28264]	Terminator	369	+	-0.60479	1.85	3.65	-1.81	0.0478	1
chr13:45431650-45432405					Intergenic	757		-0.107692	2.31	3.86	-1.55	0.0479	1
chr17:81510022-81512343	ENSG00000184009	ACTG1	protein_coding	actin gamma 1 [Source:HGNC Symbol;Acc:HGNC:144]	Promoter,GeneBody,Terminator	2323	-	-0.000772201	6.71	5.76	0.95	0.0479	1
chr8:18594482-18596679	ENSG00000156011	PSD3	protein_coding	pleckstrin and Sec7 domain containing 3 [Source:HGNC Symbol;Acc:HGNC:19093]	GeneBody	2199	-	0.0906475	3.17	0.85	2.32	0.048	1
chrX:63410207-63411209					Intergenic	1004		0.178744	4.4	5.35	-0.95	0.0481	1
chr3:160970269-160970921	ENSG00000163590	PPM1L	protein_coding	protein phosphatase, Mg2+/Mn2+ dependent 1L [Source:HGNC Symbol;Acc:HGNC:16381]	GeneBody	654	+	-0.0137931	4.31	2.78	1.53	0.0481	1
chr1:148141760-148142252	ENSG00000263956	NBPF11	protein_coding	NBPF member 11 [Source:HGNC Symbol;Acc:HGNC:31993]	GeneBody	494	-	0.558333	3.44	1.5	1.94	0.0481	1
chr3:111679836-111680443	ENSG00000240891	PLCXD2	protein_coding	phosphatidylinositol specific phospholipase C X domain containing 2 [Source:HGNC Symbol;Acc:HGNC:26462]	GeneBody	609	+	-0.191336	4.48	5.53	-1.05	0.0481	1
chr15:85795506-85796028	ENSG00000183655	KLHL25	protein_coding	kelch like family member 25 [Source:HGNC Symbol;Acc:HGNC:25732]	Promoter	524	-	0.146341	1.77	3.75	-1.98	0.0482	1
chr1:39101847-39103008	ENSG00000127603	MACF1	protein_coding	microtubule actin crosslinking factor 1 [Source:HGNC Symbol;Acc:HGNC:13664]	GeneBody	1163	+	0.163194	3.4	4.55	-1.15	0.0482	1
chr5:14854561-14855130	ENSG00000154122	ANKH	protein_coding	ANKH inorganic pyrophosphate transport regulator [Source:HGNC Symbol;Acc:HGNC:15492]	GeneBody	571	-	-0.284722	2.11	3.86	-1.75	0.0483	1
chr2:96771018-96772398	ENSG00000158158	CNNM4	protein_coding	cyclin and CBS domain divalent metal cation transport mediator 4 [Source:HGNC Symbol;Acc:HGNC:105]	GeneBody	1382	+	-0.0850767	4.91	3.37	1.53	0.0483	1
chr11:67360043-67361437	ENSG00000256514	AP003419.1	protein_coding	novel protein	GeneBody	1396	-	0.0276565	5.41	4.3	1.11	0.0484	1
chr20:176019-176955					Intergenic	938		-0.498871	3.85	5	-1.15	0.0485	1
chr1:52612107-52613266					Intergenic	1161		-0.391813	3.6	4.81	-1.21	0.0485	1
chr3:185451887-185452511	ENSG00000073803	MAP3K13	protein_coding	mitogen-activated protein kinase kinase kinase 13 [Source:HGNC Symbol;Acc:HGNC:6852]	GeneBody	626	+	-0.0798479	4.46	3.06	1.4	0.0485	1
chr5:109029026-109029436	ENSG00000151422	FER	protein_coding	FER tyrosine kinase [Source:HGNC Symbol;Acc:HGNC:3655]	GeneBody	412	+	-0.0225564	4.44	3.14	1.3	0.0486	1
chr5:426023-427301	ENSG00000063438	AHRR	protein_coding	aryl-hydrocarbon receptor repressor [Source:HGNC Symbol;Acc:HGNC:346]	GeneBody	1280	+	0.695205	5.16	5.99	-0.83	0.0487	1
chr2:227091544-227092154	ENSG00000081052	COL4A4	protein_coding	collagen type IV alpha 4 chain [Source:HGNC Symbol;Acc:HGNC:2206]	GeneBody	612	-	0.1	4.48	3.33	1.15	0.0488	1
chr5:177453502-177454157	ENSG00000131188	PRR7	protein_coding	proline rich 7, synaptic [Source:HGNC Symbol;Acc:HGNC:28130]	GeneBody	657	+	0.0282776	1.51	3.61	-2.1	0.0489	1
chr2:231702503-231703202					Intergenic	701		-0.112462	4.54	3.24	1.3	0.0491	1
chr13:76912003-76912533					Intergenic	532		-0.103448	2.25	3.8	-1.56	0.0491	1
chr8:127432782-127433372	ENSG00000246228	CASC8	lncRNA	cancer susceptibility 8 [Source:HGNC Symbol;Acc:HGNC:45129]	GeneBody	592	-	-0.535714	2.08	3.77	-1.69	0.0491	1
chr6:6022652-6023360					Intergenic	710		-0.259494	5.2	4.14	1.06	0.0491	1
chr1:201208695-201211907	ENSG00000163395	IGFN1	protein_coding	immunoglobulin like and fibronectin type III domain containing 1 [Source:HGNC Symbol;Acc:HGNC:24607]	GeneBody	3214	+	0.650814	4.14	5.11	-0.96	0.0492	1
chr20:63692629-63694365	ENSG00000258366	RTEL1	protein_coding	regulator of telomere elongation helicase 1 [Source:HGNC Symbol;Acc:HGNC:15888]	GeneBody	1738	+	-0.264679	4.55	3.03	1.52	0.0493	1
chr19:38510176-38511989	ENSG00000196218	RYR1	protein_coding	ryanodine receptor 1 [Source:HGNC Symbol;Acc:HGNC:10483]	GeneBody	1815	+	-0.0462777	4.23	5.24	-1.01	0.0493	1
chr7:132776893-132777850					Intergenic	959		-0.283262	4.23	2.86	1.37	0.0493	1
chr10:50135070-50135431	ENSG00000099290	WASHC2A	protein_coding	WASH complex subunit 2A [Source:HGNC Symbol;Acc:HGNC:23416]	Terminator	363	+	-0.125749	2.18	-0.42	2.6	0.0494	1
chr9:133198658-133199452					Intergenic	796		0.0947368	4.51	3.16	1.35	0.0494	1
chr14:77564642-77565527	ENSG00000100596	SPTLC2	protein_coding	serine palmitoyltransferase long chain base subunit 2 [Source:HGNC Symbol;Acc:HGNC:11278]	GeneBody	887	-	0.0223464	4.84	3.63	1.21	0.0495	1
chr10:35619780-35620513					Intergenic	735		0.0704225	4.13	2.69	1.44	0.0495	1
chr11:64113399-64115035	ENSG00000126500	AP006333.1	protein_coding	fibronectin leucine rich transmembrane protein 1 [Source:NCBI gene;Acc:23769]	GeneBody	1638	+	0.702871	4.5	5.38	-0.88	0.0496	1
chr7:92592296-92592916	ENSG00000234545	FAM133B	protein_coding	family with sequence similarity 133 member B [Source:HGNC Symbol;Acc:HGNC:28629]	Promoter	622	-	0.0884354	2.67	4.22	-1.55	0.0497	1
chr8:138741786-138743625	ENSG00000169436	COL22A1	protein_coding	collagen type XXII alpha 1 chain [Source:HGNC Symbol;Acc:HGNC:22989]	GeneBody	1841	-	0.910736	4.87	5.72	-0.85	0.0497	1
chr14:75958759-75959179	ENSG00000119699	TGFB3	protein_coding	transforming growth factor beta 3 [Source:HGNC Symbol;Acc:HGNC:11769]	Terminator	422	-	-0.227273	2.59	4.07	-1.48	0.0497	1
chr20:16390874-16391878	ENSG00000089177	KIF16B	protein_coding	kinesin family member 16B [Source:HGNC Symbol;Acc:HGNC:15869]	GeneBody	1006	-	0.192079	3.47	4.8	-1.33	0.0497	1
chr2:55519093-55520258	ENSG00000163001	CFAP36	protein_coding	cilia and flagella associated protein 36 [Source:HGNC Symbol;Acc:HGNC:30540]	Promoter	1167	+	-0.11145	3.54	4.7	-1.16	0.0498	1
chr20:5689890-5690715					Intergenic	827		0.0976253	2.96	4.32	-1.36	0.0499	1
chr17:30649849-30650965					Intergenic	1118		0.0465839	2.37	-0.42	2.79	0.05	1
chr14:77069294-77070003	ENSG00000246548	LINC02288	lncRNA	long intergenic non-protein coding RNA 2288 [Source:HGNC Symbol;Acc:HGNC:27505]	GeneBody,Terminator	711	+	-0.033033	5.23	4.22	1.01	0.0501	1
chrX:155767346-155768158	ENSG00000168939	SPRY3	protein_coding	sprouty RTK signaling antagonist 3 [Source:HGNC Symbol;Acc:HGNC:11271]	Promoter	814	+	0.3	3.94	4.93	-1	0.0502	1
chr10:79792924-79793624	ENSG00000225484	NUTM2B-AS1	lncRNA	NUTM2B antisense RNA 1 [Source:HGNC Symbol;Acc:HGNC:51204]	GeneBody	702	-	-0.222892	-0.24	2.2	-2.43	0.0502	1
chr12:6904809-6906532	ENSG00000010626	LRRC23	protein_coding	leucine rich repeat containing 23 [Source:HGNC Symbol;Acc:HGNC:19138]	Promoter,GeneBody	1725	+	0.130811	4.1	5.29	-1.19	0.0503	1
chr1:200038814-200039286	ENSG00000116833	NR5A2	protein_coding	nuclear receptor subfamily 5 group A member 2 [Source:HGNC Symbol;Acc:HGNC:7984]	GeneBody	474	+	0.154839	1.99	3.76	-1.77	0.0505	1
chr3:106926673-106928136	ENSG00000242759	LINC00882	lncRNA	long intergenic non-protein coding RNA 882 [Source:HGNC Symbol;Acc:HGNC:48568]	GeneBody	1465	-	0.404196	5.58	6.45	-0.87	0.0506	1
chr1:204374724-204375197					Intergenic	475		-0.395918	2.43	3.92	-1.49	0.0506	1
chr4:187304410-187305397	ENSG00000250658	AC097652.1	lncRNA	novel transcript	GeneBody,Terminator	989	-	-0.27476	-0.24	2.3	-2.54	0.0507	1
chrX:148334352-148334795					Intergenic	445		-0.317757	1.95	3.73	-1.78	0.0507	1
chr20:34503588-34504382	ENSG00000078747	ITCH	protein_coding	itchy E3 ubiquitin protein ligase [Source:HGNC Symbol;Acc:HGNC:13890]	GeneBody	796	+	0.0482315	4.1	2.38	1.72	0.0508	1
chr20:639979-640500					Intergenic	523		-0.462069	2.8	4.15	-1.35	0.0509	1
chr16:69710945-69711848	ENSG00000261602	AC092115.3	lncRNA	novel transcript	GeneBody,Terminator	905	+	-0.0191388	5.36	4.32	1.03	0.051	1
chr10:101660495-101661207	ENSG00000107829	FBXW4	protein_coding	F-box and WD repeat domain containing 4 [Source:HGNC Symbol;Acc:HGNC:10847]	GeneBody	714	-	0.0598802	1.56	3.56	-2.01	0.051	1
chr7:150901528-150902160					Intergenic	634		0.274854	2.46	3.98	-1.53	0.051	1
chr5:13655172-13656341					Intergenic	1171		-0.457912	3.74	4.76	-1.03	0.051	1
chr2:149095561-149096351	ENSG00000150556	LYPD6B	protein_coding	LY6/PLAUR domain containing 6B [Source:HGNC Symbol;Acc:HGNC:27018]	GeneBody	792	+	0.463542	3.86	5.03	-1.17	0.0511	1
chr12:128473031-128473728	ENSG00000181234	TMEM132C	protein_coding	transmembrane protein 132C [Source:HGNC Symbol;Acc:HGNC:25436]	GeneBody	699	+	-0.679525	2.96	4.21	-1.26	0.0511	1
chr13:31032171-31032749					Intergenic	580		-0.370242	1.8	3.56	-1.77	0.0511	1
chr6:163194240-163195149	ENSG00000112530	PACRG	protein_coding	parkin coregulated [Source:HGNC Symbol;Acc:HGNC:19152]	GeneBody	911	+	-0.155462	2.78	4.45	-1.68	0.0511	1
chr19:49172188-49173593	ENSG00000130529	TRPM4	protein_coding	transient receptor potential cation channel subfamily M member 4 [Source:HGNC Symbol;Acc:HGNC:17993]	GeneBody	1407	+	-0.656442	3.79	4.9	-1.11	0.0512	1
chr22:39347322-39348401	ENSG00000100321	SYNGR1	protein_coding	synaptogyrin 1 [Source:HGNC Symbol;Acc:HGNC:11498]	Promoter	1081	+	-0.124464	5.55	4.52	1.03	0.0513	1
chr1:41862381-41862880	ENSG00000127124	HIVEP3	protein_coding	HIVEP zinc finger 3 [Source:HGNC Symbol;Acc:HGNC:13561]	GeneBody	501	-	-0.193133	1.93	3.64	-1.7	0.0514	1
chr11:17495818-17496371	ENSG00000006611	USH1C	protein_coding	USH1 protein network component harmonin [Source:HGNC Symbol;Acc:HGNC:12597]	GeneBody	555	-	0.417219	2.77	4.21	-1.44	0.0515	1
chr10:92378819-92379430					Intergenic	613		-0.0113208	4.21	2.92	1.29	0.0516	1
chr3:12704456-12705609					Intergenic	1155		0.143898	3.48	4.86	-1.37	0.0517	1
chr7:54719037-54720004	ENSG00000286404	AC011228.2	lncRNA	novel transcript	Promoter	969	+	-0.398773	5.41	6.24	-0.83	0.0517	1
chr19:51321869-51323611	ENSG00000142549	IGLON5	protein_coding	IgLON family member 5 [Source:HGNC Symbol;Acc:HGNC:34550]	GeneBody	1744	+	-0.15748	4.94	5.82	-0.88	0.0518	1
chr19:34999880-35000529	ENSG00000269303	AC020907.3	lncRNA	novel transcript	Promoter	651	-	-0.107221	2.45	4.03	-1.58	0.0518	1
chr13:99495701-99496527	ENSG00000280734	LINC01232	lncRNA	long intergenic non-protein coding RNA 1232 [Source:HGNC Symbol;Acc:HGNC:49755]	Promoter,GeneBody	828	-	0.0341207	2.94	4.37	-1.43	0.0518	1
chr3:129207981-129209016					Intergenic	1037		-0.121857	5.31	4.09	1.22	0.052	1
chr12:127573674-127574520	ENSG00000287622	AC068787.5	lncRNA	novel transcript	GeneBody	848	+	-0.329815	2.81	4.3	-1.49	0.052	1
chr19:17143588-17144504	ENSG00000099331	MYO9B	protein_coding	myosin IXB [Source:HGNC Symbol;Acc:HGNC:7609]	GeneBody	918	+	0.111607	3.71	2.03	1.69	0.052	1
chr11:46410976-46411773	ENSG00000110497	AMBRA1	protein_coding	autophagy and beclin 1 regulator 1 [Source:HGNC Symbol;Acc:HGNC:25990]	GeneBody	799	-	-0.00242131	4.72	3.44	1.28	0.052	1
chr8:101672191-101672785					Intergenic	596		0.188525	3.82	2.13	1.69	0.0523	1
chr19:32745643-32747143	ENSG00000173809	TDRD12	protein_coding	tudor domain containing 12 [Source:HGNC Symbol;Acc:HGNC:25044]	GeneBody	1502	+	0.682831	3.28	4.5	-1.23	0.0523	1
chr1:51617917-51618473	ENSG00000117859	OSBPL9	protein_coding	oxysterol binding protein like 9 [Source:HGNC Symbol;Acc:HGNC:16386]	Promoter,GeneBody	558	+	0.0785714	2.66	4.06	-1.4	0.0523	1
chrX:136070421-136071125					Intergenic	706		0.298551	3.24	4.44	-1.2	0.0523	1
chr3:173814843-173815453	ENSG00000169760	NLGN1	protein_coding	neuroligin 1 [Source:HGNC Symbol;Acc:HGNC:14291]	GeneBody	612	+	-0.290566	3.34	4.49	-1.15	0.0524	1
chr19:47626136-47627719	ENSG00000063169	BICRA	protein_coding	BRD4 interacting chromatin remodeling complex associated protein [Source:HGNC Symbol;Acc:HGNC:4332]	Promoter,GeneBody	1585	+	-0.0340633	2.57	4.26	-1.69	0.0524	1
chr14:19291344-19292234					Intergenic	892		-0.102975	2.25	-0.42	2.66	0.0524	1
chr1:113793532-113794028	ENSG00000081019	RSBN1	protein_coding	round spermatid basic protein 1 [Source:HGNC Symbol;Acc:HGNC:25642]	GeneBody	498	-	-0.273543	3.43	4.54	-1.11	0.0525	1
chr20:33778296-33779728	ENSG00000131061	ZNF341	protein_coding	zinc finger protein 341 [Source:HGNC Symbol;Acc:HGNC:15992]	GeneBody	1434	+	0.00715308	3.78	4.83	-1.06	0.0525	1
chr3:126259824-126261274					Intergenic	1452		-0.63305	4.54	5.46	-0.92	0.0525	1
chr16:11485230-11486555	ENSG00000188897	AC099489.1	protein_coding	novel lipoprotein amino terminal region containing protein	GeneBody	1327	-	0.312102	3.74	4.8	-1.06	0.0525	1
chr14:48075256-48075956					Intergenic	702		0.462366	4.6	3.51	1.09	0.0526	1
chr14:76328557-76329126					Intergenic	571		-0.029703	3.16	4.37	-1.22	0.0526	1
chr3:11276615-11277591	ENSG00000197548	ATG7	protein_coding	autophagy related 7 [Source:HGNC Symbol;Acc:HGNC:16935]	GeneBody	978	+	-0.290179	3.84	4.83	-0.99	0.0526	1
chr8:125521515-125522012	ENSG00000253111	AC091114.1	lncRNA	novel transcript	GeneBody	499	+	-0.675439	3.52	4.74	-1.22	0.0527	1
chr11:65009966-65010530					Intergenic	566		0.0075188	4.31	3.1	1.2	0.0527	1
chr9:42388442-42389610					Intergenic	1170		-0.258621	2.53	4	-1.47	0.0527	1
chr5:172884068-172885104	ENSG00000113719	ERGIC1	protein_coding	endoplasmic reticulum-golgi intermediate compartment 1 [Source:HGNC Symbol;Acc:HGNC:29205]	GeneBody	1038	+	-0.122727	4.65	3.45	1.19	0.0529	1
chr17:48556420-48557164	ENSG00000239552	HOXB-AS2	lncRNA	HOXB cluster antisense RNA 2 [Source:HGNC Symbol;Acc:HGNC:40284]	Promoter	746	+	0.119534	3.01	4.34	-1.33	0.053	1
chr12:7808083-7810202					Intergenic	2121		-0.0635721	5.39	4.01	1.38	0.053	1
chr5:62314583-62315546	ENSG00000068796	KIF2A	protein_coding	kinesin family member 2A [Source:HGNC Symbol;Acc:HGNC:6318]	GeneBody	965	+	0.0357995	3.3	4.49	-1.18	0.0532	1
chr16:32821751-32822545	ENSG00000260158	AC137761.1	lncRNA	novel transcript	GeneBody	796	+	-0.74026	4.8	3.82	0.99	0.0533	1
chr19:47323829-47324726	ENSG00000197405	C5AR1	protein_coding	complement C5a receptor 1 [Source:HGNC Symbol;Acc:HGNC:1338]	Terminator	899	+	-0.208494	3.17	4.48	-1.31	0.0533	1
chr10:80460688-80461585	ENSG00000108219	TSPAN14	protein_coding	tetraspanin 14 [Source:HGNC Symbol;Acc:HGNC:23303]	GeneBody	899	+	-0.0868687	2.42	3.99	-1.58	0.0535	1
chr12:32084828-32085653					Intergenic	827		-0.00578035	4.7	3.29	1.41	0.0535	1
chr11:69064422-69065426	ENSG00000162341	TPCN2	protein_coding	two pore segment channel 2 [Source:HGNC Symbol;Acc:HGNC:20820]	GeneBody	1006	+	0.195205	4.86	3.64	1.22	0.0536	1
chr19:44787095-44788882	ENSG00000142273	CBLC	protein_coding	Cbl proto-oncogene C [Source:HGNC Symbol;Acc:HGNC:15961]	GeneBody	1789	+	-0.0209302	5.07	3.92	1.15	0.0536	1
chr14:59424836-59425298					Intergenic	464		-0.410714	2.6	4.05	-1.45	0.0536	1
chr16:4445587-4446250	ENSG00000103423	DNAJA3	protein_coding	DnaJ heat shock protein family (Hsp40) member A3 [Source:HGNC Symbol;Acc:HGNC:11808]	GeneBody	665	+	-0.0686567	4.13	2.83	1.3	0.0536	1
chr16:46792508-46793306					Intergenic	800		0.0754717	4.25	2.76	1.49	0.0537	1
chr16:15946391-15946957					Intergenic	568		-0.162264	2.33	3.85	-1.52	0.0537	1
chr1:115136073-115136540					Intergenic	469		0.428571	3.53	4.69	-1.16	0.0538	1
chr20:63905122-63905792	ENSG00000101152	DNAJC5	protein_coding	DnaJ heat shock protein family (Hsp40) member C5 [Source:HGNC Symbol;Acc:HGNC:16235]	GeneBody	672	+	-0.0842697	2.4	3.93	-1.54	0.0538	1
chr1:235024447-235025527					Intergenic	1082		0.115108	4.93	3.9	1.02	0.0538	1
chr7:22571641-22572122	ENSG00000232759	AC002480.1	lncRNA	novel transcript, antisense to STEAP1B	GeneBody	483	+	0.0781893	2.13	3.83	-1.7	0.0539	1
chr19:52601768-52602951					Intergenic	1185		0.254839	4.88	5.75	-0.87	0.054	1
chr10:13924940-13925878	ENSG00000151474	FRMD4A	protein_coding	FERM domain containing 4A [Source:HGNC Symbol;Acc:HGNC:25491]	GeneBody	940	-	-0.0194175	4.62	3.39	1.22	0.054	1
chr17:8251189-8252341	ENSG00000178921	PFAS	protein_coding	phosphoribosylformylglycinamidine synthase [Source:HGNC Symbol;Acc:HGNC:8863]	GeneBody	1154	+	0.0123023	3.41	4.71	-1.3	0.054	1
chr20:29599659-29600171					Intergenic	514		0.102881	3.09	0.84	2.26	0.0541	1
chr17:7716718-7717928	ENSG00000183914	DNAH2	protein_coding	dynein axonemal heavy chain 2 [Source:HGNC Symbol;Acc:HGNC:2948]	Promoter	1212	+	-0.0625798	3.29	4.44	-1.16	0.0541	1
chr2:46100861-46101452	ENSG00000171132	PRKCE	protein_coding	protein kinase C epsilon [Source:HGNC Symbol;Acc:HGNC:9401]	GeneBody	593	+	0.00704225	2.53	4.05	-1.52	0.0541	1
chr19:48082257-48083575	ENSG00000105499	PLA2G4C	protein_coding	phospholipase A2 group IVC [Source:HGNC Symbol;Acc:HGNC:9037]	GeneBody	1320	-	-0.114695	5.29	4.16	1.13	0.0542	1
chr19:54169497-54170572	ENSG00000167608	TMC4	protein_coding	transmembrane channel like 4 [Source:HGNC Symbol;Acc:HGNC:22998]	GeneBody	1077	-	0.0871985	5.35	4.35	1.01	0.0543	1
chr3:10647139-10647933					Intergenic	796		0.296482	3.59	4.64	-1.04	0.0543	1
chr20:32487914-32488887	ENSG00000286311	AL034550.3	lncRNA	novel transcript, antisense to NOL4L	GeneBody,Terminator	975	+	-0.178744	4.47	3.22	1.25	0.0544	1
chr3:105365979-105367263	ENSG00000170017	ALCAM	protein_coding	activated leukocyte cell adhesion molecule [Source:HGNC Symbol;Acc:HGNC:400]	Promoter	1286	+	0.0445344	5.18	6.31	-1.13	0.0544	1
chr11:20112139-20112629	ENSG00000166833	NAV2	protein_coding	neuron navigator 2 [Source:HGNC Symbol;Acc:HGNC:15997]	GeneBody	492	+	-0.011236	3.19	4.41	-1.23	0.0544	1
chr11:119137372-119139117	ENSG00000172273	HINFP	protein_coding	histone H4 transcription factor [Source:HGNC Symbol;Acc:HGNC:17850]	Terminator	1747	+	0.247475	4.05	5.01	-0.96	0.0546	1
chr3:9276026-9276728					Intergenic	704		-0.138554	3.14	4.34	-1.2	0.0546	1
chr22:46566671-46567976					Intergenic	1307		-0.740614	0.83	2.97	-2.14	0.0547	1
chr16:30069853-30070348	ENSG00000285043	AC093512.2	protein_coding	uncharaterized LOC112694756 [Source:NCBI gene;Acc:112694756]	Terminator	497	+	-0.028754	4.39	3.05	1.34	0.0548	1
chr12:30235963-30236804	ENSG00000257756	LINC02386	lncRNA	long intergenic non-protein coding RNA 2386 [Source:HGNC Symbol;Acc:HGNC:53312]	GeneBody	843	-	0.448622	3.13	4.33	-1.2	0.0548	1
chr22:21593302-21594192	ENSG00000185651	UBE2L3	protein_coding	ubiquitin conjugating enzyme E2 L3 [Source:HGNC Symbol;Acc:HGNC:12488]	GeneBody	892	+	-0.379455	3.02	4.5	-1.48	0.0548	1
chr5:155399613-155400420					Intergenic	809		-0.0236686	4.42	3.25	1.17	0.0549	1
chr14:76404610-76405789	ENSG00000119715	ESRRB	protein_coding	estrogen related receptor beta [Source:HGNC Symbol;Acc:HGNC:3473]	GeneBody	1181	+	0.0140845	3.51	4.71	-1.21	0.0549	1
chr12:25182153-25182981	ENSG00000118307	CASC1	protein_coding	cancer susceptibility 1 [Source:HGNC Symbol;Acc:HGNC:29599]	GeneBody	830	-	0.10396	3.67	4.73	-1.07	0.0549	1
chr2:230908330-230908926	ENSG00000230385	AC012507.1	lncRNA	novel transcript	Promoter,GeneBody	598	+	-0.339233	2.37	4.1	-1.73	0.055	1
chr14:102237256-102240366	ENSG00000080823	MOK	protein_coding	MOK protein kinase [Source:HGNC Symbol;Acc:HGNC:9833]	GeneBody	3112	-	-0.322643	5.59	6.46	-0.87	0.055	1
chr12:110775633-110776495					Intergenic	864		0.149296	4.2	2.92	1.27	0.0551	1
chr12:54423002-54423585	ENSG00000258137	AC079313.2	lncRNA	novel transcript, antisense to ZNF385A, GPR84, ITGA5 and GTSF1	GeneBody	585	+	0.101754	2.35	3.9	-1.55	0.0551	1
chr16:59521651-59522358					Intergenic	709		0.509859	2.42	3.93	-1.52	0.0551	1
chr2:142873939-142874634					Intergenic	697		0.47541	2.92	4.34	-1.42	0.0551	1
chr6:34044065-34045364	ENSG00000124493	GRM4	protein_coding	glutamate metabotropic receptor 4 [Source:HGNC Symbol;Acc:HGNC:4596]	GeneBody	1301	-	-0.512195	4.5	3.37	1.13	0.0551	1
chr12:123559241-123560359					Intergenic	1120		0.093578	4.62	3.51	1.11	0.0552	1
chr17:5049705-5051309					Intergenic	1606		0.0939227	3.33	4.52	-1.19	0.0552	1
chr3:107441299-107442533	ENSG00000273125	LINC01990	lncRNA	long intergenic non-protein coding RNA 1990 [Source:HGNC Symbol;Acc:HGNC:52822]	GeneBody	1236	+	0.280977	5.38	6.17	-0.78	0.0552	1
chr20:35544188-35545583	ENSG00000125991	ERGIC3	protein_coding	ERGIC and golgi 3 [Source:HGNC Symbol;Acc:HGNC:15927]	GeneBody	1397	+	-0.00543478	4.43	2.86	1.57	0.0552	1
chr10:48271090-48271793	ENSG00000170324	FRMPD2	protein_coding	FERM and PDZ domain containing 2 [Source:HGNC Symbol;Acc:HGNC:28572]	GeneBody	705	-	-0.140299	2.09	3.78	-1.7	0.0553	1
chr9:136163367-136163876					Intergenic	511		-0.0860215	4.27	2.98	1.29	0.0553	1
chr9:133997481-133999007					Intergenic	1528		-0.85438	2.85	4.43	-1.58	0.0554	1
chr2:120419728-120420338					Intergenic	612		-0.839465	3.13	4.38	-1.24	0.0554	1
chr6:117402264-117403039	ENSG00000047936	ROS1	protein_coding	ROS proto-oncogene 1, receptor tyrosine kinase [Source:HGNC Symbol;Acc:HGNC:10261]	GeneBody	777	-	-0.139665	2.05	3.82	-1.77	0.0554	1
chr3:129224076-129224645					Intergenic	571		0.126866	4.37	2.82	1.55	0.0555	1
chr21:10726033-10737530					Intergenic	11499		-0.756333	6.37	7.33	-0.96	0.0555	1
chr4:146285820-146287102	ENSG00000120519	SLC10A7	protein_coding	solute carrier family 10 member 7 [Source:HGNC Symbol;Acc:HGNC:23088]	GeneBody	1284	-	0.762712	1.66	3.47	-1.82	0.0555	1
chr1:115473252-115474150					Intergenic	900		0.396752	4.31	5.23	-0.92	0.0555	1
chr4:27613579-27614001					Intergenic	424		-0.2	1.97	3.68	-1.71	0.0556	1
chr20:1119705-1120281	ENSG00000125818	PSMF1	protein_coding	proteasome inhibitor subunit 1 [Source:HGNC Symbol;Acc:HGNC:9571]	GeneBody	578	+	-0.47331	2.46	4.1	-1.64	0.0556	1
chr7:56346786-56348221					Intergenic	1437		-0.0823864	5.42	6.24	-0.82	0.0556	1
chr6:34066976-34068007	ENSG00000124493	GRM4	protein_coding	glutamate metabotropic receptor 4 [Source:HGNC Symbol;Acc:HGNC:4596]	GeneBody	1033	-	-0.411371	3.75	4.82	-1.07	0.0556	1
chr2:66244846-66245758					Intergenic	914		-0.435897	1.89	3.72	-1.83	0.0556	1
chr16:48996357-48996924					Intergenic	569		0.271375	2.46	3.96	-1.5	0.0557	1
chr17:7495833-7496964	ENSG00000181222	POLR2A	protein_coding	RNA polymerase II subunit A [Source:HGNC Symbol;Acc:HGNC:9187]	GeneBody	1133	+	0.217929	3.35	4.46	-1.11	0.0557	1
chr5:10616944-10618138	ENSG00000164236	ANKRD33B	protein_coding	ankyrin repeat domain 33B [Source:HGNC Symbol;Acc:HGNC:35240]	GeneBody	1196	+	-0.267776	3.23	4.68	-1.45	0.0557	1
chr16:2890114-2890842	ENSG00000162076	FLYWCH2	protein_coding	FLYWCH family member 2 [Source:HGNC Symbol;Acc:HGNC:25178]	GeneBody	730	+	-0.0437318	4.69	3.59	1.1	0.0558	1
chr11:100785109-100785467	ENSG00000165895	ARHGAP42	protein_coding	Rho GTPase activating protein 42 [Source:HGNC Symbol;Acc:HGNC:26545]	GeneBody	360	+	0.468354	3.11	4.27	-1.17	0.0559	1
chr15:91009090-91009590	ENSG00000284946	AC068831.8	protein_coding	novel protein	GeneBody	502	-	-0.13834	2.29	3.8	-1.51	0.0559	1
chr1:86798208-86798792					Intergenic	586		0.0857143	2.64	4.01	-1.36	0.0559	1
chr6:10770744-10771288	ENSG00000111837	MAK	protein_coding	male germ cell associated kinase [Source:HGNC Symbol;Acc:HGNC:6816]	GeneBody	546	-	0.371841	2.42	3.9	-1.49	0.056	1
chr11:102246613-102247608					Intergenic	997		0.0176211	4.89	3.7	1.2	0.0561	1
chr12:63738072-63738767	ENSG00000249753	AC084357.2	lncRNA	antisense to TMEM5	GeneBody	697	-	-0.171271	0.5	2.74	-2.24	0.0562	1
chr11:18446810-18447548	ENSG00000166796	LDHC	protein_coding	lactate dehydrogenase C [Source:HGNC Symbol;Acc:HGNC:6544]	GeneBody	740	+	0.180428	3.25	4.46	-1.21	0.0563	1
chr1:211678650-211679169					Intergenic	521		0.118519	4.32	2.95	1.37	0.0563	1
chr1:115284509-115285281	ENSG00000285698	AL049825.1	lncRNA	Novel transcript	Promoter,GeneBody,Terminator	774	-	-0.0102041	3.54	4.83	-1.29	0.0563	1
chr13:109383058-109383691					Intergenic	635		0.576159	0.24	2.47	-2.23	0.0563	1
chr19:38523059-38524238	ENSG00000196218	RYR1	protein_coding	ryanodine receptor 1 [Source:HGNC Symbol;Acc:HGNC:10483]	GeneBody	1181	+	-0.367013	3.89	4.92	-1.03	0.0564	1
chr9:39590041-39590604					Intergenic	565		-0.0758123	2.28	-0.42	2.69	0.0564	1
chrX:65607990-65608594					Intergenic	606		0.417219	3.81	4.84	-1.03	0.0565	1
chr19:17428829-17429488					Intergenic	661		0.115265	4.13	2.8	1.32	0.0566	1
chr22:25092097-25092713	ENSG00000197077	KIAA1671	protein_coding	KIAA1671 [Source:HGNC Symbol;Acc:HGNC:29345]	GeneBody	618	+	0.41875	2.75	4.06	-1.32	0.0566	1
chr14:76297252-76298714	ENSG00000258402	AC016526.1	lncRNA	novel transcript	GeneBody	1464	-	-0.0737463	3.66	4.88	-1.22	0.0567	1
chr1:27461207-27461961	ENSG00000158195	WASF2	protein_coding	WASP family member 2 [Source:HGNC Symbol;Acc:HGNC:12733]	GeneBody,Terminator	756	-	-0.177719	4.26	2.74	1.52	0.0567	1
chr3:107145110-107146122	ENSG00000242759	LINC00882	lncRNA	long intergenic non-protein coding RNA 882 [Source:HGNC Symbol;Acc:HGNC:48568]	GeneBody	1014	-	0.0801887	3.69	4.97	-1.28	0.0567	1
chr20:829984-830709					Intergenic	727		-0.0310559	2.71	4.21	-1.5	0.0567	1
chr3:190741605-190742208					Intergenic	605		0.357143	3.48	4.54	-1.06	0.0567	1
chr7:99273302-99274108	ENSG00000284523	AC004834.1	lncRNA	novel transcript	GeneBody	808	-	0.252381	2.88	4.2	-1.32	0.0568	1
chr12:49207005-49207984					Intergenic	981		0.139831	5	4.04	0.96	0.0569	1
chr22:20509072-20509834	ENSG00000099917	MED15	protein_coding	mediator complex subunit 15 [Source:HGNC Symbol;Acc:HGNC:14248]	GeneBody	764	+	0.364384	2.88	4.28	-1.4	0.057	1
chr5:116841367-116842521					Intergenic	1156		0.0577281	4.53	3.42	1.1	0.0571	1
chr3:27599606-27600230					Intergenic	626		-0.318182	1.49	3.47	-1.98	0.0572	1
chr8:114245018-114245502					Intergenic	486		-0.447964	0.5	2.71	-2.21	0.0573	1
chr16:13264545-13265739	ENSG00000262801	U91319.1	lncRNA	novel transcript	GeneBody	1196	+	-0.729272	4.11	5.08	-0.97	0.0573	1
chr10:50374452-50375479	ENSG00000198964	SGMS1	protein_coding	sphingomyelin synthase 1 [Source:HGNC Symbol;Acc:HGNC:29799]	GeneBody	1029	-	-0.0380313	3.5	4.68	-1.18	0.0573	1
chr6:136235782-136236311	ENSG00000146410	MTFR2	protein_coding	mitochondrial fission regulator 2 [Source:HGNC Symbol;Acc:HGNC:21115]	GeneBody	531	-	0.23622	1.88	3.55	-1.68	0.0574	1
chr6:36154177-36154595					Intergenic	420		0.149425	1.01	3.17	-2.16	0.0575	1
chr8:22677407-22678491	ENSG00000261026	AC105046.1	lncRNA	novel transcript, overlapping to EGR3	Terminator	1086	-	0.286416	2.17	3.99	-1.82	0.0575	1
chr1:59693417-59694242	ENSG00000172456	FGGY	protein_coding	FGGY carbohydrate kinase domain containing [Source:HGNC Symbol;Acc:HGNC:25610]	GeneBody	827	+	0.285714	3.42	4.52	-1.1	0.0576	1
chr5:3488578-3489404	ENSG00000248118	LINC01019	lncRNA	long intergenic non-protein coding RNA 1019 [Source:HGNC Symbol;Acc:HGNC:27742]	GeneBody	828	-	-0.589286	4.74	5.57	-0.83	0.0576	1
chr14:76816430-76817824					Intergenic	1396		-0.429012	4.8	5.66	-0.86	0.0577	1
chr7:57491353-57497008					Intergenic	5657		0.525244	5.32	6.33	-1.02	0.0577	1
chr1:114213039-114213644	ENSG00000232895	AL121999.1	lncRNA	novel transcript	GeneBody	607	-	0.349481	3.62	4.73	-1.11	0.0577	1
chr19:16774085-16774986	ENSG00000188039	NWD1	protein_coding	NACHT and WD repeat domain containing 1 [Source:HGNC Symbol;Acc:HGNC:27619]	GeneBody	903	+	-0.896956	3.71	4.78	-1.07	0.0577	1
chr6:110861149-110863078					Intergenic	1931		-0.00934579	4.97	3.87	1.1	0.0577	1
chrX:119494279-119495206					Intergenic	929		-0.0492611	2.53	3.99	-1.46	0.0578	1
chr6:30617171-30617836	ENSG00000204569	PPP1R10	protein_coding	protein phosphatase 1 regulatory subunit 10 [Source:HGNC Symbol;Acc:HGNC:9284]	Promoter	667	-	-0.229917	2.78	4.1	-1.32	0.0579	1
chr7:27102966-27104160	ENSG00000105996	HOXA2	protein_coding	homeobox A2 [Source:HGNC Symbol;Acc:HGNC:5103]	Promoter	1196	-	-0.0368098	4.25	5.16	-0.9	0.058	1
chr17:37850912-37851586					Intergenic	676		-0.186544	3.83	2.37	1.46	0.0581	1
chr2:217461479-217461951	ENSG00000231672	DIRC3	lncRNA	disrupted in renal carcinoma 3 [Source:HGNC Symbol;Acc:HGNC:17805]	GeneBody	474	-	0.585586	2.99	4.35	-1.37	0.0581	1
chr16:20968626-20969438	ENSG00000158486	DNAH3	protein_coding	dynein axonemal heavy chain 3 [Source:HGNC Symbol;Acc:HGNC:2949]	GeneBody	814	-	-0.307292	3.89	4.88	-0.99	0.0582	1
chr1:230821121-230821933	ENSG00000225656	AL118511.2	lncRNA	novel transcript	Terminator	814	-	0.234624	3.45	4.63	-1.18	0.0583	1
chr19:38187025-38188015	ENSG00000269653	AC011479.4	lncRNA	novel transcript, sense intronic to SIPA1L3	GeneBody,Terminator	992	+	0.0984252	4.45	3.16	1.29	0.0583	1
chr1:145552220-145554599					Intergenic	2381		0.0153509	3.4	1.2	2.19	0.0583	1
chr16:29907820-29908717	ENSG00000174943	KCTD13	protein_coding	potassium channel tetramerization domain containing 13 [Source:HGNC Symbol;Acc:HGNC:22234]	GeneBody,Terminator	899	-	0.159624	4.44	3.24	1.2	0.0584	1
chr7:5653695-5654345	ENSG00000011275	RNF216	protein_coding	ring finger protein 216 [Source:HGNC Symbol;Acc:HGNC:21698]	GeneBody	652	-	0.265176	2.62	3.98	-1.36	0.0585	1
chr5:7194516-7195283	ENSG00000250974	LINC02196	lncRNA	long intergenic non-protein coding RNA 2196 [Source:HGNC Symbol;Acc:HGNC:53062]	GeneBody	769	+	0.0909091	-0.24	2.13	-2.37	0.0585	1
chr11:78038875-78041184	ENSG00000259112	NDUFC2-KCTD14	protein_coding	NDUFC2-KCTD14 readthrough [Source:HGNC Symbol;Acc:HGNC:42956]	GeneBody	2311	-	-0.0628988	5.91	5.02	0.89	0.0586	1
chr4:39766762-39767506	ENSG00000078140	UBE2K	protein_coding	ubiquitin conjugating enzyme E2 K [Source:HGNC Symbol;Acc:HGNC:4914]	GeneBody	746	+	-0.021021	4.12	2.79	1.33	0.0588	1
chr20:45986206-45986725					Intergenic	521		-0.380531	3.13	4.35	-1.22	0.0588	1
chr16:15285076-15285912					Intergenic	838		0.368132	2.64	0.56	2.08	0.0588	1
chr3:45991491-45992185	ENSG00000163820	FYCO1	protein_coding	FYVE and coiled-coil domain autophagy adaptor 1 [Source:HGNC Symbol;Acc:HGNC:14673]	GeneBody	696	-	-0.0727763	2.57	4.08	-1.51	0.0588	1
chr1:155744185-155744692					Intergenic	509		0.0390625	4.03	2.6	1.43	0.0592	1
chr8:127617337-127618267					Intergenic	932		0.240781	3.45	4.58	-1.13	0.0592	1
chr17:45282356-45283030	ENSG00000006062	MAP3K14	protein_coding	mitogen-activated protein kinase kinase kinase 14 [Source:HGNC Symbol;Acc:HGNC:6853]	GeneBody	676	-	0.0402299	4.19	2.87	1.32	0.0592	1
chr6:125301855-125302466	ENSG00000111906	HDDC2	protein_coding	HD domain containing 2 [Source:HGNC Symbol;Acc:HGNC:21078]	Promoter	613	-	-0.471264	3.15	4.36	-1.21	0.0593	1
chr2:47265802-47266219	ENSG00000234690	EPCAM-DT	lncRNA	EPCAM divergent transcript [Source:HGNC Symbol;Acc:HGNC:52639]	GeneBody	419	-	0.0761421	1.94	3.65	-1.71	0.0595	1
chr17:77888648-77889227					Intergenic	581		0.165468	2.94	4.2	-1.26	0.0596	1
chr4:41559765-41560636	ENSG00000064042	LIMCH1	protein_coding	LIM and calponin homology domains 1 [Source:HGNC Symbol;Acc:HGNC:29191]	GeneBody	873	+	-0.322751	3.12	4.57	-1.45	0.0596	1
chr14:76513568-76514339	ENSG00000259124	AC008050.1	lncRNA	novel transcript	GeneBody	773	-	-0.150895	3.76	4.78	-1.01	0.0596	1
chr17:10016623-10017502	ENSG00000007237	GAS7	protein_coding	growth arrest specific 7 [Source:HGNC Symbol;Acc:HGNC:4169]	GeneBody	881	-	0.0127226	4.26	2.85	1.41	0.0597	1
chr1:241434900-241435741	ENSG00000287516	AL359764.2	lncRNA	novel transcript	GeneBody	843	+	-0.566265	4.17	5.12	-0.96	0.0598	1
chr10:3221291-3221867	ENSG00000236968	AL451164.1	lncRNA	novel transcript	Promoter	578	+	-0.257576	1.24	3.17	-1.93	0.06	1
chr10:80234968-80235899					Intergenic	933		-0.0217391	2.14	-0.42	2.56	0.06	1
chr14:103295960-103296448					Intergenic	490		0.0378378	3.46	4.55	-1.09	0.06	1
chr7:29588333-29589672					Intergenic	1341		-0.003125	3.45	4.59	-1.14	0.0601	1
chr10:15091453-15092086					Intergenic	635		-0.265823	2.79	4.11	-1.32	0.0602	1
chr16:81743006-81743906	ENSG00000261218	AC099524.1	lncRNA	novel transcript	GeneBody	902	+	0.199143	2.77	4.08	-1.31	0.0602	1
chr2:174053426-174054014					Intergenic	590		0.245283	3.06	4.27	-1.21	0.0603	1
chr14:74083860-74085475	ENSG00000119711	ALDH6A1	protein_coding	aldehyde dehydrogenase 6 family member A1 [Source:HGNC Symbol;Acc:HGNC:7179]	Promoter	1617	-	0.0706638	5.19	6.21	-1.02	0.0603	1
chr5:45978073-45979768					Intergenic	1697		0.169435	2.62	0.34	2.28	0.0603	1
chr11:17588752-17590515	ENSG00000188162	OTOG	protein_coding	otogelin [Source:HGNC Symbol;Acc:HGNC:8516]	GeneBody	1765	+	-0.405276	4.39	5.31	-0.92	0.0604	1
chr3:111739361-111739976	ENSG00000240891	PLCXD2	protein_coding	phosphatidylinositol specific phospholipase C X domain containing 2 [Source:HGNC Symbol;Acc:HGNC:26462]	GeneBody	617	+	-0.00377358	5.44	6.2	-0.76	0.0605	1
chr20:34764704-34765711	ENSG00000286803	AL109824.1	lncRNA	novel transcript, antisense to NCOA6	GeneBody	1009	+	0.141053	4.55	3.38	1.18	0.0605	1
chr12:96215064-96215645	ENSG00000111145	ELK3	protein_coding	ETS transcription factor ELK3 [Source:HGNC Symbol;Acc:HGNC:3325]	GeneBody	583	+	0.0390625	3.83	2.34	1.49	0.0605	1
chr1:235300623-235301524	ENSG00000054267	ARID4B	protein_coding	AT-rich interaction domain 4B [Source:HGNC Symbol;Acc:HGNC:15550]	GeneBody	903	-	-0.00995025	4.82	3.77	1.04	0.0605	1
chr7:100251246-100251801	ENSG00000239521	CASTOR3	protein_coding	CASTOR family member 3 [Source:HGNC Symbol;Acc:HGNC:29954]	GeneBody	557	-	0.126437	3.73	1.96	1.77	0.0606	1
chr11:61164187-61166027					Intergenic	1842		-0.00970874	4.7	5.59	-0.9	0.0606	1
chr20:12200310-12200903					Intergenic	595		0.00757576	3.1	4.29	-1.19	0.0607	1
chr7:55924210-55924724	ENSG00000249773	AC092647.5	protein_coding	novel zinc finger protein 713 (ZNF713) and mitochondrial ribosomal protein S17 (MRPS17) protein	GeneBody	516	+	-0.240175	3.81	5.02	-1.21	0.0607	1
chr2:235377925-235378362					Intergenic	439		-0.454545	1.92	3.65	-1.73	0.0607	1
chr1:16097528-16099008					Intergenic	1482		0.0903955	4.18	5.2	-1.03	0.0607	1
chr4:72568763-72569276	ENSG00000156140	ADAMTS3	protein_coding	ADAM metallopeptidase with thrombospondin type 1 motif 3 [Source:HGNC Symbol;Acc:HGNC:219]	Promoter	515	-	0.100719	2.23	3.78	-1.54	0.0607	1
chr5:1272274-1274076	ENSG00000164362	TERT	protein_coding	telomerase reverse transcriptase [Source:HGNC Symbol;Acc:HGNC:11730]	GeneBody	1804	-	-0.436314	1.33	3.26	-1.93	0.0609	1
chr17:74568442-74569430	ENSG00000284690	CD300H	polymorphic_pseudogene	CD300H molecule (gene/pseudogene) [Source:HGNC Symbol;Acc:HGNC:52292]	Promoter	990	-	0.795276	5.07	4.01	1.06	0.061	1
chr19:13806270-13807815	ENSG00000132003	ZSWIM4	protein_coding	zinc finger SWIM-type containing 4 [Source:HGNC Symbol;Acc:HGNC:25704]	GeneBody	1547	+	0.556164	4.16	5.18	-1.01	0.061	1
chr3:9915870-9917205	ENSG00000163701	IL17RE	protein_coding	interleukin 17 receptor E [Source:HGNC Symbol;Acc:HGNC:18439]	Promoter,Terminator	1337	+	0.0821745	3.64	4.73	-1.09	0.0611	1
chr7:100492406-100493574	ENSG00000166924	NYAP1	protein_coding	neuronal tyrosine phosphorylated phosphoinositide-3-kinase adaptor 1 [Source:HGNC Symbol;Acc:HGNC:22009]	GeneBody	1170	+	0.193878	3.47	4.56	-1.09	0.0613	1
chr20:46297963-46298739	ENSG00000149654	CDH22	protein_coding	cadherin 22 [Source:HGNC Symbol;Acc:HGNC:13251]	GeneBody	778	-	0.169492	3.3	4.44	-1.14	0.0613	1
chr5:172011279-172012341					Intergenic	1064		-0.0885609	4.5	3.03	1.48	0.0614	1
chr12:57622203-57623266	ENSG00000287908	AC025165.6	protein_coding	novel protein	GeneBody,Terminator	1065	+	-0.256944	3.21	4.6	-1.39	0.0614	1
chr1:116687462-116688408					Intergenic	948		0.155172	4.37	5.26	-0.89	0.0615	1
chr10:103238717-103239368					Intergenic	653		0.29375	3.17	4.38	-1.22	0.0615	1
chr2:150955703-150956245					Intergenic	544		-0.504	1.9	3.64	-1.73	0.0615	1
chr18:22890457-22891505	ENSG00000265943	AC090912.1	lncRNA	novel transcript, antisense to RBBP8	GeneBody	1050	-	-0.00917431	-0.24	2.16	-2.4	0.0615	1
chr7:4904936-4905654	ENSG00000136297	MMD2	protein_coding	monocyte to macrophage differentiation associated 2 [Source:HGNC Symbol;Acc:HGNC:30133]	Terminator	720	-	0.456919	3.8	4.9	-1.1	0.0616	1
chr12:112173504-112174724	ENSG00000173064	HECTD4	protein_coding	HECT domain E3 ubiquitin protein ligase 4 [Source:HGNC Symbol;Acc:HGNC:26611]	GeneBody	1222	-	-0.096463	4.4	3.16	1.24	0.0618	1
chr19:56961668-56963158					Intergenic	1492		-0.291339	4.39	5.42	-1.03	0.0618	1
chr10:47639094-47639955					Intergenic	863		-0.135514	1.94	-0.42	2.35	0.062	1
chr17:19259155-19260551	ENSG00000072134	EPN2	protein_coding	epsin 2 [Source:HGNC Symbol;Acc:HGNC:18639]	GeneBody	1398	+	0.0670315	4.63	3.35	1.28	0.0621	1
chr19:18343189-18344343	ENSG00000130517	PGPEP1	protein_coding	pyroglutamyl-peptidase I [Source:HGNC Symbol;Acc:HGNC:13568]	GeneBody	1156	+	0.0321489	3.21	4.43	-1.22	0.0621	1
chr12:34207580-34208086	ENSG00000255652	AC140847.2	lncRNA	novel transcript	GeneBody	508	-	-0.189964	2.86	4.16	-1.29	0.0621	1
chr11:64978307-64980653					Intergenic	2348		0.0331588	5.7	4.81	0.89	0.0622	1
chr12:32017287-32018521					Intergenic	1236		-0.0857143	5.11	4.17	0.94	0.0622	1
chr6:6882630-6883466					Intergenic	838		0.005	3.39	4.48	-1.09	0.0622	1
chr9:136271430-136272052					Intergenic	624		-0.00341297	3.94	2.46	1.48	0.0622	1
chr1:243384998-243385555	ENSG00000054282	SDCCAG8	protein_coding	serologically defined colon cancer antigen 8 [Source:HGNC Symbol;Acc:HGNC:10671]	GeneBody	559	+	0.246377	1.46	3.45	-1.99	0.0623	1
chr10:29003012-29003541					Intergenic	531		-0.0769231	4.08	2.44	1.64	0.0623	1
chr22:46680327-46680970	ENSG00000075240	GRAMD4	protein_coding	GRAM domain containing 4 [Source:HGNC Symbol;Acc:HGNC:29113]	Terminator	645	+	-0.631436	2.17	3.78	-1.61	0.0623	1
chr9:133161561-133162094	ENSG00000285245	AL162417.1	protein_coding	novel protein	GeneBody	535	-	0.194444	1.93	3.54	-1.61	0.0624	1
chr3:125369074-125369663	ENSG00000163848	ZNF148	protein_coding	zinc finger protein 148 [Source:HGNC Symbol;Acc:HGNC:12933]	GeneBody	591	-	-0.0755556	4.38	3.22	1.16	0.0624	1
chr13:98612633-98613119					Intergenic	488		-0.295154	3.11	4.27	-1.17	0.0625	1
chr1:226514310-226515113					Intergenic	805		0.1	4.65	3.48	1.17	0.0625	1
chr7:1415188-1416485					Intergenic	1299		0.932011	3.86	4.89	-1.02	0.0626	1
chr1:145977399-145978269	ENSG00000280778	AC243547.3	protein_coding	novel protein, lncRNA-POLR3GL readthrough	GeneBody,Terminator	872	+	0.00229885	3.24	4.41	-1.17	0.0626	1
chr12:115322963-115323671					Intergenic	710		0.913333	5.16	4.3	0.86	0.0627	1
chr19:1549180-1549847					Intergenic	669		-0.793478	2.44	4.04	-1.6	0.0628	1
chr12:115251014-115251657					Intergenic	645		0.605096	2.66	4.06	-1.4	0.0629	1
chrX:107454116-107455314					Intergenic	1200		-0.347409	3.18	4.43	-1.25	0.0629	1
chr19:11226970-11228007	ENSG00000130158	DOCK6	protein_coding	dedicator of cytokinesis 6 [Source:HGNC Symbol;Acc:HGNC:19189]	GeneBody	1039	-	0.232877	3.57	4.67	-1.09	0.063	1
chr9:110058461-110058990	ENSG00000157654	PALM2AKAP2	protein_coding	PALM2 and AKAP2 fusion [Source:HGNC Symbol;Acc:HGNC:33529]	GeneBody	531	+	-0.203252	2.62	4.05	-1.42	0.063	1
chr12:128847116-128848112					Intergenic	998		0.110204	4.38	3.18	1.2	0.063	1
chr12:123654313-123654910	ENSG00000111358	GTF2H3	protein_coding	general transcription factor IIH subunit 3 [Source:HGNC Symbol;Acc:HGNC:4657]	GeneBody	599	+	0.654618	3.69	4.69	-1	0.063	1
chr10:67948773-67949455	ENSG00000148634	HERC4	protein_coding	HECT and RLD domain containing E3 ubiquitin protein ligase 4 [Source:HGNC Symbol;Acc:HGNC:24521]	GeneBody	684	-	0.0337838	4.26	2.85	1.42	0.063	1
chr10:71901392-71902593					Intergenic	1203		-0.00869565	4.83	3.57	1.26	0.0631	1
chr20:19671186-19672068	ENSG00000185052	SLC24A3	protein_coding	solute carrier family 24 member 3 [Source:HGNC Symbol;Acc:HGNC:10977]	GeneBody	884	+	0.389313	3.59	4.64	-1.05	0.0634	1
chr9:113356216-113356877	ENSG00000119411	BSPRY	protein_coding	B-box and SPRY domain containing [Source:HGNC Symbol;Acc:HGNC:18232]	GeneBody	663	+	0.331378	2.15	3.81	-1.66	0.0634	1
chr12:95654489-95655690					Intergenic	1203		0.84375	1.74	3.46	-1.72	0.0635	1
chr19:53617358-53618908					Intergenic	1552		0.0345865	6.1	5.29	0.82	0.0635	1
chr1:116859723-116860691					Intergenic	970		0.0723982	4.03	4.95	-0.92	0.0638	1
chr10:101518656-101519083	ENSG00000166167	BTRC	protein_coding	beta-transducin repeat containing E3 ubiquitin protein ligase [Source:HGNC Symbol;Acc:HGNC:1144]	GeneBody	429	+	-0.147541	1.35	3.24	-1.89	0.0639	1
chr8:100657279-100658090					Intergenic	813		0.17207	3.68	4.79	-1.1	0.064	1
chr3:143798524-143799261	ENSG00000181804	SLC9A9	protein_coding	solute carrier family 9 member A9 [Source:HGNC Symbol;Acc:HGNC:20653]	GeneBody	739	-	-0.391549	1.34	3.33	-1.99	0.064	1
chr7:130516260-130517385	ENSG00000158623	COPG2	protein_coding	COPI coat complex subunit gamma 2 [Source:HGNC Symbol;Acc:HGNC:2237]	GeneBody	1127	-	0.471173	4.65	3.5	1.14	0.064	1
chr12:52945433-52946093					Intergenic	662		-0.147453	2.53	4.03	-1.5	0.0641	1
chr19:45859967-45860896	ENSG00000125755	SYMPK	protein_coding	symplekin [Source:HGNC Symbol;Acc:HGNC:22935]	GeneBody	931	-	0.0872818	4.77	3.59	1.17	0.0641	1
chr6:145450450-145450884					Intergenic	436		-0.247191	3.39	1.47	1.91	0.0641	1
chr16:31117411-31118873	ENSG00000262766	AC135050.5	lncRNA	novel transcript	Promoter,GeneBody,Terminator	1464	+	-0.0588235	4.16	5.09	-0.93	0.0642	1
chr9:130544565-130545305					Intergenic	742		-0.00502513	2	3.72	-1.72	0.0643	1
chr4:167314509-167315232					Intergenic	725		-0.0693069	4.36	3.22	1.14	0.0643	1
chr11:62753795-62754593	ENSG00000185670	ZBTB3	protein_coding	zinc finger and BTB domain containing 3 [Source:HGNC Symbol;Acc:HGNC:22918]	Promoter	800	-	-0.23431	3.78	4.83	-1.05	0.0643	1
chr14:25064767-25065316					Intergenic	551		-0.415638	3.06	4.24	-1.18	0.0644	1
chr3:32516080-32516534					Intergenic	456		0.0331754	3.72	1.87	1.85	0.0645	1
chr1:222547620-222548510	ENSG00000143512	HHIPL2	protein_coding	HHIP like 2 [Source:HGNC Symbol;Acc:HGNC:25842]	Promoter	892	-	-0.10883	3.29	4.58	-1.29	0.0645	1
chr8:85063981-85064956					Intergenic	977		-0.473233	3.36	4.5	-1.14	0.0645	1
chr2:178267374-178268078	ENSG00000079156	OSBPL6	protein_coding	oxysterol binding protein like 6 [Source:HGNC Symbol;Acc:HGNC:16388]	GeneBody	706	+	0.128631	4.24	2.98	1.26	0.0646	1
chr16:29974760-29975405	ENSG00000149930	TAOK2	protein_coding	TAO kinase 2 [Source:HGNC Symbol;Acc:HGNC:16835]	Promoter,GeneBody,Terminator	647	+	-0.0787879	2.18	3.93	-1.74	0.0646	1
chr5:140017281-140017770	ENSG00000158458	NRG2	protein_coding	neuregulin 2 [Source:HGNC Symbol;Acc:HGNC:7998]	GeneBody	491	-	0.346535	1.11	3.23	-2.12	0.0647	1
chr3:51545135-51546288	ENSG00000164080	RAD54L2	protein_coding	RAD54 like 2 [Source:HGNC Symbol;Acc:HGNC:29123]	GeneBody	1155	+	-0.020794	4.41	3.16	1.24	0.0648	1
chr3:109264232-109265452					Intergenic	1222		0.262295	6.31	5.53	0.79	0.0648	1
chr10:47685359-47685730					Intergenic	373		0.216216	0.24	2.48	-2.24	0.0649	1
chr12:120280639-120281246					Intergenic	609		0.204152	3.86	2.41	1.45	0.065	1
chr4:37560947-37561434	ENSG00000154274	C4orf19	protein_coding	chromosome 4 open reading frame 19 [Source:HGNC Symbol;Acc:HGNC:25618]	GeneBody	489	+	-0.281818	1.89	3.64	-1.75	0.065	1
chr16:1686385-1686927	ENSG00000261732	AL031708.1	protein_coding	novel protein	GeneBody,Terminator	544	+	0.071161	2.05	3.75	-1.7	0.065	1
chr19:40349042-40349643	ENSG00000160392	C19orf47	protein_coding	chromosome 19 open reading frame 47 [Source:HGNC Symbol;Acc:HGNC:26723]	Promoter	603	-	-0.353741	2.33	3.81	-1.48	0.0651	1
chr14:50069129-50070124					Intergenic	997		0.0816777	4.5	3.35	1.15	0.0651	1
chr16:70607490-70609506	ENSG00000157368	IL34	protein_coding	interleukin 34 [Source:HGNC Symbol;Acc:HGNC:28529]	GeneBody	2018	+	0.0464646	5.13	3.93	1.19	0.0651	1
chr16:27311780-27312581	ENSG00000274092	AC106739.1	lncRNA	novel transcript, antisense to IL4R	Promoter,Terminator	803	-	0.00238663	1.33	3.35	-2.02	0.0651	1
chr3:187177373-187178522	ENSG00000163923	RPL39L	protein_coding	ribosomal protein L39 like [Source:HGNC Symbol;Acc:HGNC:17094]	GeneBody	1151	-	0.471698	1.81	3.55	-1.74	0.0651	1
chr3:197516473-197517073	ENSG00000161267	BDH1	protein_coding	3-hydroxybutyrate dehydrogenase 1 [Source:HGNC Symbol;Acc:HGNC:1027]	GeneBody	602	-	-0.28481	3.08	4.24	-1.16	0.0652	1
chr1:146045468-146046280					Intergenic	814		0.0225989	4.19	3.04	1.16	0.0652	1
chr5:172089417-172090450	ENSG00000072786	STK10	protein_coding	serine/threonine kinase 10 [Source:HGNC Symbol;Acc:HGNC:11388]	GeneBody	1035	-	0.470356	3.75	4.9	-1.14	0.0652	1
chr12:57317649-57318552	ENSG00000179912	R3HDM2	protein_coding	R3H domain containing 2 [Source:HGNC Symbol;Acc:HGNC:29167]	GeneBody	905	-	0.12743	4.74	3.74	1.01	0.0652	1
chr22:24504424-24504908	ENSG00000100024	UPB1	protein_coding	beta-ureidopropionase 1 [Source:HGNC Symbol;Acc:HGNC:16297]	GeneBody	486	+	-0.168421	4.33	2.97	1.37	0.0653	1
chr3:141697608-141698807					Intergenic	1201		0.492958	3.55	4.72	-1.17	0.0654	1
chr1:54217349-54217913	ENSG00000116221	MRPL37	protein_coding	mitochondrial ribosomal protein L37 [Source:HGNC Symbol;Acc:HGNC:14034]	GeneBody	566	+	-0.159722	2.57	3.99	-1.41	0.0654	1
chr2:120922479-120923816	ENSG00000074047	GLI2	protein_coding	GLI family zinc finger 2 [Source:HGNC Symbol;Acc:HGNC:4318]	GeneBody	1339	+	-0.358896	4.58	3.35	1.22	0.0654	1
chr12:113638513-113639295					Intergenic	784		-0.188119	3.34	4.51	-1.17	0.0654	1
chr10:77213822-77215244	ENSG00000156113	KCNMA1	protein_coding	potassium calcium-activated channel subfamily M alpha 1 [Source:HGNC Symbol;Acc:HGNC:6284]	GeneBody	1424	-	-0.417974	4.26	5.29	-1.03	0.0657	1
chr1:223702245-223702949					Intergenic	706		0.189711	3.95	4.99	-1.04	0.0658	1
chr3:114383592-114384656	ENSG00000181722	ZBTB20	protein_coding	zinc finger and BTB domain containing 20 [Source:HGNC Symbol;Acc:HGNC:13503]	Promoter	1066	-	-0.158562	3.26	4.45	-1.2	0.0659	1
chr19:50611213-50612231					Intergenic	1020		-0.0901288	4.49	3.34	1.16	0.0659	1
chr17:79477250-79477721	ENSG00000167281	RBFOX3	protein_coding	RNA binding fox-1 homolog 3 [Source:HGNC Symbol;Acc:HGNC:27097]	GeneBody	473	-	0.163347	3.99	2.64	1.35	0.066	1
chr2:231454836-231455704	ENSG00000115053	NCL	protein_coding	nucleolin [Source:HGNC Symbol;Acc:HGNC:7667]	GeneBody,Terminator	870	-	-0.229219	5.41	4.48	0.93	0.066	1
chr1:221974916-221975556	ENSG00000228437	LINC02474	lncRNA	long intergenic non-protein coding RNA 2474 [Source:HGNC Symbol;Acc:HGNC:53417]	GeneBody	642	+	0.463918	2.82	4.06	-1.24	0.066	1
chr14:33628950-33629741	ENSG00000151322	NPAS3	protein_coding	neuronal PAS domain protein 3 [Source:HGNC Symbol;Acc:HGNC:19311]	GeneBody	793	+	0.0621469	3.48	4.61	-1.13	0.0661	1
chr5:138751672-138752909	ENSG00000253404	AC034243.1	lncRNA	novel transcript	Promoter,GeneBody	1239	-	0.108239	1.81	3.86	-2.04	0.0662	1
chr11:78007896-78008718					Intergenic	824		-0.152542	4.49	3.27	1.22	0.0662	1
chr9:35004583-35005191					Intergenic	610		-0.498282	1.67	3.5	-1.83	0.0663	1
chr2:221412154-221412786					Intergenic	634		0.0867925	4.96	3.99	0.97	0.0663	1
chr14:64755664-64756668	ENSG00000070182	SPTB	protein_coding	spectrin beta, erythrocytic [Source:HGNC Symbol;Acc:HGNC:11274]	GeneBody	1006	-	-0.0120968	2.78	4.4	-1.62	0.0663	1
chr6:7807152-7807931	ENSG00000153162	BMP6	protein_coding	bone morphogenetic protein 6 [Source:HGNC Symbol;Acc:HGNC:1073]	GeneBody	781	+	-0.0781671	4.13	2.61	1.52	0.0665	1
chr11:31833861-31834779	ENSG00000285283	AL035078.4	protein_coding	novel protein	GeneBody	920	+	0.317536	3.36	4.65	-1.3	0.0665	1
chr19:14332506-14334769	ENSG00000266913	LINC01841	lncRNA	long intergenic non-protein coding RNA 1841 [Source:HGNC Symbol;Acc:HGNC:52655]	Promoter,GeneBody	2265	-	0.0195122	5.39	4.41	0.97	0.0665	1
chr1:32448901-32450051					Intergenic	1152		0.0637523	3.2	4.35	-1.15	0.0666	1
chr9:94540711-94541281					Intergenic	572		-0.505226	2.48	3.9	-1.42	0.0666	1
chr20:32971635-32972183					Intergenic	550		0.0352113	1.96	3.56	-1.6	0.0666	1
chr1:52711770-52712622					Intergenic	854		0.117493	4.2	2.76	1.44	0.0667	1
chr14:74566594-74567279	ENSG00000119681	LTBP2	protein_coding	latent transforming growth factor beta binding protein 2 [Source:HGNC Symbol;Acc:HGNC:6715]	GeneBody	687	-	-0.110577	2.7	4.32	-1.62	0.0668	1
chr17:4071563-4072178	ENSG00000074755	ZZEF1	protein_coding	zinc finger ZZ-type and EF-hand domain containing 1 [Source:HGNC Symbol;Acc:HGNC:29027]	GeneBody	617	-	0.4	2.69	4.01	-1.32	0.067	1
chr8:127228722-127229221					Intergenic	501		-0.0333333	4.31	5.19	-0.89	0.0672	1
chr1:85564715-85565258	ENSG00000282057	AC092807.4	lncRNA	novel transcript	GeneBody	545	-	0.0881226	3.89	2.32	1.57	0.0672	1
chr17:18125396-18126139	ENSG00000091536	MYO15A	protein_coding	myosin XVA [Source:HGNC Symbol;Acc:HGNC:7594]	GeneBody	745	+	0.0696517	4.49	3.21	1.28	0.0672	1
chr7:158570839-158571523	ENSG00000155093	PTPRN2	protein_coding	protein tyrosine phosphatase receptor type N2 [Source:HGNC Symbol;Acc:HGNC:9677]	GeneBody	686	-	-0.058104	2.24	3.81	-1.57	0.0673	1
chr1:81246298-81247297					Intergenic	1001		-0.493927	3.18	4.36	-1.18	0.0673	1
chr3:170227950-170228558	ENSG00000163558	PRKCI	protein_coding	protein kinase C iota [Source:HGNC Symbol;Acc:HGNC:9404]	GeneBody	610	+	0.251852	2.84	4.17	-1.33	0.0673	1
chr16:49695005-49695683	ENSG00000102935	ZNF423	protein_coding	zinc finger protein 423 [Source:HGNC Symbol;Acc:HGNC:16762]	GeneBody	680	-	-0.13881	4.19	3	1.18	0.0674	1
chr12:55973908-55974737	ENSG00000111540	RAB5B	protein_coding	RAB5B, member RAS oncogene family [Source:HGNC Symbol;Acc:HGNC:9784]	Promoter,Terminator	831	+	0.344894	3.09	4.31	-1.21	0.0674	1
chr1:51622679-51623173	ENSG00000117859	OSBPL9	protein_coding	oxysterol binding protein like 9 [Source:HGNC Symbol;Acc:HGNC:16386]	GeneBody	496	+	0.217391	2.92	4.15	-1.23	0.0674	1
chr5:1387967-1389384					Intergenic	1419		-0.533619	5.45	6.2	-0.75	0.0674	1
chr20:20336765-20337806	ENSG00000089101	CFAP61	protein_coding	cilia and flagella associated protein 61 [Source:HGNC Symbol;Acc:HGNC:15872]	GeneBody	1043	+	0.438532	3.26	4.4	-1.13	0.0675	1
chr16:30934919-30935617	ENSG00000099364	FBXL19	protein_coding	F-box and leucine rich repeat protein 19 [Source:HGNC Symbol;Acc:HGNC:25300]	GeneBody	700	+	0.421751	2.79	4.19	-1.4	0.0676	1
chr12:111124802-111125322	ENSG00000111249	CUX2	protein_coding	cut like homeobox 2 [Source:HGNC Symbol;Acc:HGNC:19347]	GeneBody	522	+	-0.00793651	3.1	1	2.1	0.0677	1
chr15:98001750-98002549	ENSG00000258483	LINC02251	lncRNA	long intergenic non-protein coding RNA 2251 [Source:HGNC Symbol;Acc:HGNC:53149]	Promoter	801	+	0.778409	2.99	4.37	-1.38	0.0677	1
chr3:9882232-9883512					Intergenic	1282		-0.0666667	5.63	4.7	0.94	0.0679	1
chr6:11091940-11092465	ENSG00000224531	SMIM13	protein_coding	small integral membrane protein 13 [Source:HGNC Symbol;Acc:HGNC:27356]	Promoter	527	+	-0.15493	3.71	2.18	1.53	0.0679	1
chr13:102020280-102021349	ENSG00000102466	FGF14	protein_coding	fibroblast growth factor 14 [Source:HGNC Symbol;Acc:HGNC:3671]	GeneBody	1071	-	0.318777	3.22	4.47	-1.24	0.0679	1
chr17:13757236-13757851					Intergenic	617		-0.0209205	3.89	2.43	1.47	0.0679	1
chr3:192041317-192041955					Intergenic	640		0.23741	4.59	3.55	1.04	0.068	1
chr10:15594017-15594588	ENSG00000077943	ITGA8	protein_coding	integrin subunit alpha 8 [Source:HGNC Symbol;Acc:HGNC:6144]	GeneBody	573	-	-0.00769231	1.99	3.65	-1.66	0.068	1
chr17:5098512-5099139					Intergenic	629		0.217125	4.19	2.8	1.39	0.0681	1
chr7:76607869-76608798	ENSG00000146707	POMZP3	protein_coding	POM121 and ZP3 fusion [Source:HGNC Symbol;Acc:HGNC:9203]	Terminator	931	-	-0.161826	0.24	2.33	-2.09	0.0682	1
chr1:218598010-218599191					Intergenic	1183		0.385621	2.57	4	-1.42	0.0682	1
chr17:4773567-4774109	ENSG00000142484	TM4SF5	protein_coding	transmembrane 4 L six family member 5 [Source:HGNC Symbol;Acc:HGNC:11857]	GeneBody	544	+	-0.303136	3.67	1.73	1.94	0.0682	1
chr20:35597717-35598932					Intergenic	1217		0.053913	3.63	4.61	-0.99	0.0682	1
chr20:61386908-61387900	ENSG00000179242	CDH4	protein_coding	cadherin 4 [Source:HGNC Symbol;Acc:HGNC:1763]	GeneBody	994	+	-0.38326	4.24	2.98	1.25	0.0684	1
chr19:48868055-48869017	ENSG00000105559	PLEKHA4	protein_coding	pleckstrin homology domain containing A4 [Source:HGNC Symbol;Acc:HGNC:14339]	Promoter	964	-	-0.275416	3.88	4.9	-1.02	0.0684	1
chr10:71588841-71589460	ENSG00000107736	CDH23	protein_coding	cadherin related 23 [Source:HGNC Symbol;Acc:HGNC:13733]	GeneBody	621	+	-0.16568	3.73	1.6	2.14	0.0684	1
chr17:21968729-21984500					Intergenic	15773		0.655681	6.58	7.51	-0.93	0.0685	1
chr7:445669-446397	ENSG00000286764	AC188617.2	lncRNA	novel transcript	Promoter	730	+	0.362637	3.37	4.55	-1.18	0.0685	1
chr14:51777864-51778563	ENSG00000258535	AL079307.1	lncRNA	novel transcript	GeneBody	701	+	-0.484765	3.65	4.7	-1.05	0.0685	1
chr16:58598129-58598949	ENSG00000125107	CNOT1	protein_coding	CCR4-NOT transcription complex subunit 1 [Source:HGNC Symbol;Acc:HGNC:7877]	GeneBody	822	-	0.0594059	4.55	3.35	1.21	0.0686	1
chr16:34062676-34067508					Intergenic	4834		0.691547	5.38	6.17	-0.79	0.0686	1
chr3:198172947-198174385					Intergenic	1440		0.919028	2.49	3.88	-1.39	0.0686	1
chr19:43620499-43621584	ENSG00000131116	ZNF428	protein_coding	zinc finger protein 428 [Source:HGNC Symbol;Acc:HGNC:20804]	Promoter,Terminator	1087	-	-0.00181488	3.47	4.53	-1.06	0.0687	1
chr12:116453553-116454593					Intergenic	1042		-0.05	3.22	4.43	-1.22	0.0687	1
chr7:75618001-75618522	ENSG00000127946	HIP1	protein_coding	huntingtin interacting protein 1 [Source:HGNC Symbol;Acc:HGNC:4913]	GeneBody	523	-	-0.145985	2.46	3.85	-1.39	0.0687	1
chr7:30480216-30481186	ENSG00000106100	NOD1	protein_coding	nucleotide binding oligomerization domain containing 1 [Source:HGNC Symbol;Acc:HGNC:16390]	Promoter	972	-	-0.39916	3.3	4.38	-1.08	0.0687	1
chr17:77623133-77624062	ENSG00000285535	AC021683.5	lncRNA	novel transcript	GeneBody	931	+	-0.122807	4.4	3.24	1.16	0.0688	1
chr19:31611466-31612497					Intergenic	1033		0.436242	4.68	3.6	1.08	0.0688	1
chr19:45808801-45810150	ENSG00000104941	RSPH6A	protein_coding	radial spoke head 6 homolog A [Source:HGNC Symbol;Acc:HGNC:14241]	GeneBody	1351	-	-0.0429799	4.49	3.19	1.3	0.0688	1
chr4:187990354-187990940					Intergenic	588		0.0234742	4.14	2.94	1.2	0.0689	1
chr16:88371785-88373130					Intergenic	1347		-0.862876	4.03	4.99	-0.96	0.069	1
chr2:37129771-37130784	ENSG00000055332	EIF2AK2	protein_coding	eukaryotic translation initiation factor 2 alpha kinase 2 [Source:HGNC Symbol;Acc:HGNC:9437]	GeneBody	1015	-	-0.310195	2.99	4.34	-1.35	0.0691	1
chr3:160806550-160807209	ENSG00000163590	PPM1L	protein_coding	protein phosphatase, Mg2+/Mn2+ dependent 1L [Source:HGNC Symbol;Acc:HGNC:16381]	GeneBody	661	+	0.371841	3.75	4.7	-0.95	0.0692	1
chr11:72097477-72098382	ENSG00000149357	LAMTOR1	protein_coding	late endosomal/lysosomal adaptor, MAPK and MTOR activator 1 [Source:HGNC Symbol;Acc:HGNC:26068]	GeneBody,Terminator	907	-	0.17505	3.93	5.04	-1.12	0.0692	1
chr1:232946199-232947032					Intergenic	835		-0.0660147	4.85	3.93	0.92	0.0693	1
chr19:45855473-45856277	ENSG00000125755	SYMPK	protein_coding	symplekin [Source:HGNC Symbol;Acc:HGNC:22935]	GeneBody	806	-	0.166667	3.59	2	1.59	0.0696	1
chr8:12585728-12587452	ENSG00000283674	AC068587.4	lncRNA	novel transcript	GeneBody	1726	-	0.195402	3.64	4.77	-1.12	0.0696	1
chr2:219746023-219746600					Intergenic	579		0.526316	1.87	3.71	-1.84	0.0696	1
chr9:110184244-110184605					Intergenic	363		-0.0434783	3.58	1.85	1.73	0.0696	1
chr19:35693686-35694484					Intergenic	800		-0.365741	3.4	4.47	-1.07	0.0696	1
chr10:78964561-78965223	ENSG00000224596	ZMIZ1-AS1	lncRNA	ZMIZ1 antisense RNA 1 [Source:HGNC Symbol;Acc:HGNC:27433]	GeneBody	664	-	-0.0184697	2.41	3.94	-1.54	0.0696	1
chr15:77535289-77536000	ENSG00000259362	AC046168.1	lncRNA	novel transcript	Terminator	713	+	-0.318328	4.01	2.73	1.28	0.0696	1
chr2:117843647-117844240	ENSG00000236255	AC009404.1	lncRNA	novel transcript	Terminator	595	+	-0.10687	4.1	2.87	1.22	0.0697	1
chr14:63869652-63870293	ENSG00000054654	SYNE2	protein_coding	spectrin repeat containing nuclear envelope protein 2 [Source:HGNC Symbol;Acc:HGNC:17084]	GeneBody	643	+	-0.437037	3.32	4.45	-1.13	0.0697	1
chr8:36387771-36388531					Intergenic	762		-0.423529	4.28	3.1	1.19	0.0697	1
chr10:71846964-71847810	ENSG00000197746	PSAP	protein_coding	prosaposin [Source:HGNC Symbol;Acc:HGNC:9498]	GeneBody	848	-	-0.19084	3.11	4.34	-1.22	0.0697	1
chr16:49506364-49506861	ENSG00000102935	ZNF423	protein_coding	zinc finger protein 423 [Source:HGNC Symbol;Acc:HGNC:16762]	GeneBody	499	-	0.916318	1.55	3.31	-1.76	0.0698	1
chr2:230250447-230251040	ENSG00000079263	SP140	protein_coding	SP140 nuclear body protein [Source:HGNC Symbol;Acc:HGNC:17133]	GeneBody	595	+	0.122924	1.98	3.69	-1.71	0.0698	1
chr3:170427536-170428013	ENSG00000013297	CLDN11	protein_coding	claudin 11 [Source:HGNC Symbol;Acc:HGNC:8514]	GeneBody	479	+	0.0386266	2.73	4.04	-1.3	0.0698	1
chr19:48965324-48965974	ENSG00000267898	AC026803.2	lncRNA	novel transcript	Promoter,Terminator	652	+	-0.141388	4.92	3.85	1.06	0.0698	1
chr3:105929086-105929829					Intergenic	745		-0.0662651	5.12	4.05	1.07	0.0698	1
chr5:176755562-176756154					Intergenic	594		0.10084	4.57	3.44	1.14	0.0698	1
chr6:40392711-40393530	ENSG00000156564	LRFN2	protein_coding	leucine rich repeat and fibronectin type III domain containing 2 [Source:HGNC Symbol;Acc:HGNC:21226]	GeneBody	821	-	0.493333	3.53	4.56	-1.03	0.0699	1
chr5:10554098-10556328					Intergenic	2232		0.200376	4.78	5.73	-0.95	0.0699	1
chr19:10839488-10840905					Intergenic	1419		-0.0923567	3.6	4.65	-1.05	0.0699	1
chr3:20043807-20044628	ENSG00000114166	KAT2B	protein_coding	lysine acetyltransferase 2B [Source:HGNC Symbol;Acc:HGNC:8638]	GeneBody	823	+	0.108696	2.86	4.18	-1.31	0.07	1
chr20:4202651-4203774					Intergenic	1125		-0.0443548	5.07	4.03	1.04	0.07	1
chr8:22068240-22069043	ENSG00000158856	DMTN	protein_coding	dematin actin binding protein [Source:HGNC Symbol;Acc:HGNC:3382]	GeneBody	805	+	0.29717	3.03	4.26	-1.24	0.07	1
chr5:69913313-69915125					Intergenic	1814		0.0251917	1.84	-0.42	2.25	0.0701	1
chr22:39039577-39040348	ENSG00000128394	APOBEC3F	protein_coding	apolipoprotein B mRNA editing enzyme catalytic subunit 3F [Source:HGNC Symbol;Acc:HGNC:17356]	Promoter	773	+	0.0845771	4.55	3.38	1.17	0.0704	1
chr1:240127521-240128126	ENSG00000155816	FMN2	protein_coding	formin 2 [Source:HGNC Symbol;Acc:HGNC:14074]	GeneBody	607	+	0.216828	3.41	4.62	-1.21	0.0706	1
chr10:102544816-102545305	ENSG00000107882	SUFU	protein_coding	SUFU negative regulator of hedgehog signaling [Source:HGNC Symbol;Acc:HGNC:16466]	GeneBody	491	+	-0.0695187	4.39	3.17	1.22	0.0706	1
chr2:34554814-34556851					Intergenic	2039		0.0725	-0.24	2.01	-2.25	0.0706	1
chr2:78057472-78057871	ENSG00000227088	AC012494.1	lncRNA	novel transcript	GeneBody	401	-	0.0708661	3.74	2.06	1.68	0.0707	1
chr1:173688140-173689146					Intergenic	1008		-0.486869	4	4.92	-0.92	0.0707	1
chr20:46680736-46681711	ENSG00000273893	AL133520.1	lncRNA	novel transcript, sense intronic to SLC13A3	Promoter,Terminator	977	-	0.168033	3.44	4.54	-1.1	0.0707	1
chr7:107885618-107886483					Intergenic	867		0.103797	3.11	4.26	-1.15	0.0707	1
chr1:114472744-114473568	ENSG00000197323	TRIM33	protein_coding	tripartite motif containing 33 [Source:HGNC Symbol;Acc:HGNC:16290]	GeneBody	826	-	0.185393	4	4.9	-0.9	0.0708	1
chr13:22751866-22752613					Intergenic	749		-0.762136	2.95	4.25	-1.3	0.0709	1
chr16:27849858-27851168	ENSG00000169181	GSG1L	protein_coding	GSG1 like [Source:HGNC Symbol;Acc:HGNC:28283]	GeneBody	1312	-	0.192429	2.94	4.32	-1.38	0.0709	1
chr11:75758184-75759335	ENSG00000247867	AP001922.1	lncRNA	novel transcript, antisense to DGAT2	Terminator	1153	-	0.125954	2.91	4.2	-1.29	0.0709	1
chr14:61317004-61318370	ENSG00000247287	AL359220.1	lncRNA	novel transcript, antisense to PRKCH	GeneBody	1368	-	-0.271875	3.62	4.62	-1	0.071	1
chr17:9668808-9669925	ENSG00000154914	USP43	protein_coding	ubiquitin specific peptidase 43 [Source:HGNC Symbol;Acc:HGNC:20072]	GeneBody	1119	+	0.0939227	3.96	4.87	-0.91	0.071	1
chr12:114369959-114370819	ENSG00000089225	TBX5	protein_coding	T-box transcription factor 5 [Source:HGNC Symbol;Acc:HGNC:11604]	GeneBody	862	-	0.046832	2.85	4.08	-1.23	0.071	1
chr2:31838078-31839395					Intergenic	1319		-0.0288625	2.76	4.06	-1.3	0.0711	1
chr14:76153971-76154690	ENSG00000089916	GPATCH2L	protein_coding	G-patch domain containing 2 like [Source:HGNC Symbol;Acc:HGNC:20210]	Promoter,GeneBody	721	+	0.0650155	4.8	3.76	1.04	0.0711	1
chr2:10935695-10936295					Intergenic	602		-0.0215827	2.12	3.82	-1.7	0.0711	1
chr5:7059721-7061248	ENSG00000250974	LINC02196	lncRNA	long intergenic non-protein coding RNA 2196 [Source:HGNC Symbol;Acc:HGNC:53062]	GeneBody	1529	+	0.473837	3.92	4.96	-1.05	0.0712	1
chr10:25240864-25241697	ENSG00000151025	GPR158	protein_coding	G protein-coupled receptor 158 [Source:HGNC Symbol;Acc:HGNC:23689]	GeneBody	835	+	-0.291139	4.8	3.75	1.05	0.0712	1
chr19:350723-351536					Intergenic	815		-0.942029	1.79	-0.42	2.21	0.0713	1
chr3:8453439-8454220	ENSG00000227110	LMCD1-AS1	lncRNA	LMCD1 antisense RNA 1 [Source:HGNC Symbol;Acc:HGNC:44477]	GeneBody	783	-	0.0232558	2.68	3.99	-1.3	0.0714	1
chr10:33354710-33355621					Intergenic	913		-0.387654	2.57	4.07	-1.49	0.0714	1
chr2:237607053-237608476					Intergenic	1425		-0.377841	3.61	4.62	-1.02	0.0715	1
chr17:72662103-72662969	ENSG00000133195	SLC39A11	protein_coding	solute carrier family 39 member 11 [Source:HGNC Symbol;Acc:HGNC:14463]	GeneBody	868	-	0.595166	5.25	4.36	0.89	0.0715	1
chr5:181260051-181260511	ENSG00000248275	TRIM52-AS1	lncRNA	TRIM52 antisense RNA 1 (head to head) [Source:HGNC Symbol;Acc:HGNC:49006]	Promoter,GeneBody	462	+	-0.0588235	2.21	3.69	-1.48	0.0716	1
chr16:31205679-31206542					Intergenic	865		-0.594059	4.9	3.99	0.91	0.0716	1
chr7:158385957-158386664	ENSG00000155093	PTPRN2	protein_coding	protein tyrosine phosphatase receptor type N2 [Source:HGNC Symbol;Acc:HGNC:9677]	GeneBody	709	-	-0.414414	1.51	3.36	-1.85	0.0716	1
chr2:216002639-216004048	ENSG00000118242	MREG	protein_coding	melanoregulin [Source:HGNC Symbol;Acc:HGNC:25478]	GeneBody	1411	-	-0.362702	5.29	4.47	0.82	0.0716	1
chr3:104588458-104589030					Intergenic	574		0.0194175	5.15	4.29	0.86	0.0717	1
chr3:120742832-120743490	ENSG00000153767	GTF2E1	protein_coding	general transcription factor IIE subunit 1 [Source:HGNC Symbol;Acc:HGNC:4650]	Promoter	660	+	0.0801187	2.15	3.88	-1.73	0.0718	1
chr11:19618238-19618688					Intergenic	452		0.558442	2.61	3.99	-1.38	0.0719	1
chr22:39594955-39596592	ENSG00000100346	CACNA1I	protein_coding	calcium voltage-gated channel subunit alpha1 I [Source:HGNC Symbol;Acc:HGNC:1396]	GeneBody	1639	+	0.342857	5	3.96	1.04	0.072	1
chrX:1099369-1100390					Intergenic	1023		0.625213	3.56	4.8	-1.24	0.0721	1
chr16:15541268-15541914	ENSG00000166780	BMERB1	protein_coding	bMERB domain containing 1 [Source:HGNC Symbol;Acc:HGNC:19213]	GeneBody	648	+	-0.103858	4.2	2.92	1.27	0.0721	1
chr12:52001398-52002806					Intergenic	1410		0.155937	4.92	3.91	1.01	0.0722	1
chr9:399989-401114	ENSG00000107099	DOCK8	protein_coding	dedicator of cytokinesis 8 [Source:HGNC Symbol;Acc:HGNC:19191]	GeneBody	1127	+	-0.970238	0.17	2.25	-2.07	0.0722	1
chr7:148493038-148493537	ENSG00000283504	AC006974.1	lncRNA	novel transcript	GeneBody	501	-	-0.0204082	4.29	2.97	1.33	0.0723	1
chr12:52950399-52951567	ENSG00000111057	KRT18	protein_coding	keratin 18 [Source:HGNC Symbol;Acc:HGNC:6430]	GeneBody	1170	+	0.155779	4.42	2.91	1.51	0.0724	1
chr9:119609504-119610153					Intergenic	651		-0.978339	4.98	3.97	1.02	0.0724	1
chr20:43447978-43448338					Intergenic	362		0.32967	1.83	3.51	-1.68	0.0726	1
chr11:74904414-74905023	ENSG00000166435	XRRA1	protein_coding	X-ray radiation resistance associated 1 [Source:HGNC Symbol;Acc:HGNC:18868]	GeneBody	611	-	0.00534759	4.15	2.94	1.21	0.0727	1
chr20:35171779-35172568	ENSG00000101000	PROCR	protein_coding	protein C receptor [Source:HGNC Symbol;Acc:HGNC:9452]	Promoter,Terminator	791	+	0.0507726	3.5	4.71	-1.21	0.0727	1
chr6:158914100-158914892					Intergenic	794		-0.120205	2.25	3.76	-1.51	0.0728	1
chr12:4798321-4799030					Intergenic	711		-0.191223	3.24	4.42	-1.19	0.0728	1
chr16:50649616-50650667	ENSG00000140807	NKD1	protein_coding	NKD inhibitor of WNT signaling pathway 1 [Source:HGNC Symbol;Acc:HGNC:17045]	Terminator	1053	+	-0.0306306	3.87	4.82	-0.95	0.0728	1
chr9:129462131-129462656					Intergenic	527		0.0549451	4.53	3.41	1.12	0.073	1
chr9:134024659-134025779	ENSG00000235106	BRD3OS	protein_coding	BRD3 opposite strand [Source:HGNC Symbol;Acc:HGNC:24742]	Promoter	1122	+	-0.232267	4.16	5.09	-0.93	0.0732	1
chr15:74887179-74887789					Intergenic	612		0.117845	3.74	2.21	1.54	0.0732	1
chr6:26341535-26342346					Intergenic	813		0.361502	3.79	4.75	-0.95	0.0732	1
chr14:50797384-50797995	ENSG00000100503	NIN	protein_coding	ninein [Source:HGNC Symbol;Acc:HGNC:14906]	GeneBody	613	-	0.211726	3.17	4.3	-1.13	0.0732	1
chr1:116864838-116866157					Intergenic	1321		-0.451827	4.69	5.52	-0.83	0.0734	1
chr13:40211531-40212085	ENSG00000215483	LINC00598	lncRNA	long intergenic non-protein coding RNA 598 [Source:HGNC Symbol;Acc:HGNC:42770]	GeneBody	556	-	-0.452471	2.76	4.06	-1.3	0.0734	1
chr12:120166408-120167612	ENSG00000089154	GCN1	protein_coding	GCN1 activator of EIF2AK4 [Source:HGNC Symbol;Acc:HGNC:4199]	GeneBody	1206	-	0.0643478	4.74	3.73	1.01	0.0735	1
chr1:153931121-153932092	ENSG00000284738	AL358472.5	lncRNA	novel transcript, antisense to DENND4B	GeneBody	973	+	-0.0571429	4.02	2.4	1.62	0.0735	1
chr2:232889430-232890502	ENSG00000066248	NGEF	protein_coding	neuronal guanine nucleotide exchange factor [Source:HGNC Symbol;Acc:HGNC:7807]	GeneBody	1074	-	-0.161074	2.17	3.92	-1.75	0.0735	1
chr17:5220442-5221216	ENSG00000261879	AC087500.1	lncRNA	novel transcript, antisense to C17orf87	GeneBody	776	+	0.153061	4.44	3.31	1.13	0.0737	1
chr16:26756847-26757470					Intergenic	625		0.904437	2.12	3.78	-1.66	0.0737	1
chr19:48505467-48506380	ENSG00000142235	LMTK3	protein_coding	lemur tyrosine kinase 3 [Source:HGNC Symbol;Acc:HGNC:19295]	GeneBody	915	-	0.131818	2.95	4.24	-1.29	0.0738	1
chr3:39429731-39430531	ENSG00000286781	AC099332.1	lncRNA	novel transcript	GeneBody	802	-	0.143541	4.55	3.47	1.08	0.0738	1
chr2:178235105-178235616	ENSG00000079156	OSBPL6	protein_coding	oxysterol binding protein like 6 [Source:HGNC Symbol;Acc:HGNC:16388]	GeneBody	513	+	-0.0105263	4.44	3.29	1.15	0.0738	1
chr14:77626573-77627075					Intergenic	504		0.0497738	4.94	4.04	0.9	0.0739	1
chr11:63107532-63109700	ENSG00000197658	SLC22A24	protein_coding	solute carrier family 22 member 24 [Source:HGNC Symbol;Acc:HGNC:28542]	GeneBody	2170	-	0.042654	3.55	1.7	1.85	0.0739	1
chr5:136904795-136905511					Intergenic	718		-0.374194	2.24	3.84	-1.6	0.074	1
chr11:47424848-47425331	ENSG00000165916	PSMC3	protein_coding	proteasome 26S subunit, ATPase 3 [Source:HGNC Symbol;Acc:HGNC:9549]	GeneBody	485	-	-0.150579	2.18	3.66	-1.48	0.074	1
chr1:32553551-32554463	ENSG00000160062	ZBTB8A	protein_coding	zinc finger and BTB domain containing 8A [Source:HGNC Symbol;Acc:HGNC:24172]	GeneBody	914	+	0.0640394	2.98	4.15	-1.17	0.074	1
chr5:181279731-181280709	ENSG00000248103	AC008443.3	lncRNA	novel transcript	Promoter	980	+	-0.700624	4.03	5.07	-1.05	0.0741	1
chr11:2196371-2197481					Intergenic	1112		-0.354839	3.24	4.36	-1.12	0.0743	1
chr22:25067003-25067812	ENSG00000197077	KIAA1671	protein_coding	KIAA1671 [Source:HGNC Symbol;Acc:HGNC:29345]	Promoter,GeneBody	811	+	-0.288618	3.02	4.5	-1.47	0.0743	1
chr19:41836311-41837782	ENSG00000278239	AC243967.3	lncRNA	novel transcript	Promoter,Terminator	1473	-	-0.00699301	4.9	3.84	1.07	0.0744	1
chr6:30444893-30445746					Intergenic	855		0.0944444	5.07	4.11	0.96	0.0745	1
chr20:37357349-37358049	ENSG00000197122	SRC	protein_coding	SRC proto-oncogene, non-receptor tyrosine kinase [Source:HGNC Symbol;Acc:HGNC:11283]	GeneBody	702	+	0.237852	1.96	3.61	-1.65	0.0746	1
chr1:119549470-119550518					Intergenic	1050		-0.130097	3.68	4.65	-0.97	0.0746	1
chr19:17804971-17806291	ENSG00000179913	B3GNT3	protein_coding	UDP-GlcNAc:betaGal beta-1,3-N-acetylglucosaminyltransferase 3 [Source:HGNC Symbol;Acc:HGNC:13528]	GeneBody	1322	+	-0.182236	3.83	4.76	-0.93	0.0747	1
chr3:23672224-23672904					Intergenic	682		-0.0670732	2.55	3.99	-1.43	0.0749	1
chr9:64723635-64724752					Intergenic	1119		0.918495	1.79	-0.42	2.2	0.0749	1
chr19:27845060-27845840					Intergenic	782		0.484536	3.22	4.32	-1.1	0.075	1
chr11:36024625-36026311	ENSG00000179241	LDLRAD3	protein_coding	low density lipoprotein receptor class A domain containing 3 [Source:HGNC Symbol;Acc:HGNC:27046]	GeneBody	1688	+	-0.0747051	4.79	3.67	1.13	0.075	1
chr16:29270578-29271833	ENSG00000277999	AC009093.6	lncRNA	novel transcript	Promoter,GeneBody	1257	+	0.582137	2.33	3.83	-1.5	0.075	1
chr3:138291889-138292445	ENSG00000114098	ARMC8	protein_coding	armadillo repeat containing 8 [Source:HGNC Symbol;Acc:HGNC:24999]	GeneBody	558	+	0.0117647	4.24	3.03	1.21	0.0751	1
chr6:139645836-139646467					Intergenic	633		-0.029316	3.91	2.5	1.42	0.0751	1
chr7:47063787-47064526	ENSG00000229192	AC004870.3	lncRNA	novel transcript	GeneBody	741	-	-0.647059	3.71	4.74	-1.03	0.0751	1
chr2:118201132-118201760					Intergenic	630		-0.0631229	2.78	4.06	-1.28	0.0752	1
chr10:12983587-12984078	ENSG00000151468	CCDC3	protein_coding	coiled-coil domain containing 3 [Source:HGNC Symbol;Acc:HGNC:23813]	GeneBody	493	-	0.118182	1.91	3.57	-1.66	0.0753	1
chr22:29243398-29243922	ENSG00000186998	EMID1	protein_coding	EMI domain containing 1 [Source:HGNC Symbol;Acc:HGNC:18036]	GeneBody	526	+	-0.209003	3.37	4.5	-1.13	0.0754	1
chr7:73397429-73398309					Intergenic	882		0.207547	3.11	4.42	-1.31	0.0754	1
chr11:75698356-75699226					Intergenic	872		-0.00273973	3.25	4.5	-1.25	0.0754	1
chr19:51090933-51092139					Intergenic	1208		-0.167183	4.56	3.49	1.07	0.0755	1
chr6:32175397-32177311	ENSG00000204310	AGPAT1	protein_coding	1-acylglycerol-3-phosphate O-acyltransferase 1 [Source:HGNC Symbol;Acc:HGNC:324]	Promoter,GeneBody	1916	-	-0.27767	4.58	5.43	-0.85	0.0755	1
chr10:44391797-44392845					Intergenic	1050		-0.258979	3.93	4.99	-1.06	0.0756	1
chr20:19934989-19935962	ENSG00000132669	RIN2	protein_coding	Ras and Rab interactor 2 [Source:HGNC Symbol;Acc:HGNC:18750]	GeneBody	975	+	0.108787	4.53	3.52	1.01	0.0757	1
chr19:16806741-16808902	ENSG00000188039	NWD1	protein_coding	NACHT and WD repeat domain containing 1 [Source:HGNC Symbol;Acc:HGNC:27619]	GeneBody	2163	+	0.0427948	5.19	4.09	1.1	0.0759	1
chr12:122618748-122619275	ENSG00000184445	KNTC1	protein_coding	kinetochore associated 1 [Source:HGNC Symbol;Acc:HGNC:17255]	GeneBody	529	+	-0.0390625	3.87	2.25	1.62	0.0759	1
chr9:130184255-130184975	ENSG00000107130	NCS1	protein_coding	neuronal calcium sensor 1 [Source:HGNC Symbol;Acc:HGNC:3953]	GeneBody	722	+	-0.0421053	4.17	2.94	1.23	0.0761	1
chr8:127897151-127898154	ENSG00000249859	PVT1	lncRNA	Pvt1 oncogene [Source:HGNC Symbol;Acc:HGNC:9709]	GeneBody	1005	+	0.509615	5.25	4.41	0.84	0.0761	1
chr19:51715951-51717135	ENSG00000105509	HAS1	protein_coding	hyaluronan synthase 1 [Source:HGNC Symbol;Acc:HGNC:4818]	GeneBody	1186	-	-0.369255	3.11	4.51	-1.4	0.0762	1
chr2:60400361-60400912					Intergenic	553		-0.0344828	3.94	2.3	1.64	0.0762	1
chr3:126012869-126013606	ENSG00000114544	SLC41A3	protein_coding	solute carrier family 41 member 3 [Source:HGNC Symbol;Acc:HGNC:31046]	GeneBody	739	-	0.272222	3.34	4.43	-1.09	0.0763	1
chr12:112295849-112297399	ENSG00000173064	HECTD4	protein_coding	HECT domain E3 ubiquitin protein ligase 4 [Source:HGNC Symbol;Acc:HGNC:26611]	GeneBody	1552	-	0.61529	3.74	4.88	-1.14	0.0763	1
chr6:38106121-38106561	ENSG00000156639	ZFAND3	protein_coding	zinc finger AN1-type containing 3 [Source:HGNC Symbol;Acc:HGNC:18019]	GeneBody	442	+	-0.0666667	3.41	1.38	2.03	0.0763	1
chr16:66025677-66026341					Intergenic	666		0.331058	2.38	3.89	-1.51	0.0764	1
chr11:81185564-81186046	ENSG00000287912	AP003464.1	lncRNA	novel transcript	GeneBody	484	+	-0.3	3.52	1.65	1.87	0.0765	1
chr12:50345526-50346613	ENSG00000185958	FAM186A	protein_coding	family with sequence similarity 186 member A [Source:HGNC Symbol;Acc:HGNC:26980]	GeneBody	1089	-	0.0955414	4.22	3.04	1.18	0.0765	1
chr17:7836069-7837575					Intergenic	1508		0.0149254	3.73	4.88	-1.15	0.0766	1
chr7:128226186-128227057					Intergenic	873		-0.83871	3.9	4.81	-0.91	0.0766	1
chr3:170687702-170688574	ENSG00000285218	AC026316.4	protein_coding	novel protein	GeneBody	874	+	0.345455	3.41	4.46	-1.05	0.0767	1
chr17:17676153-17676817	ENSG00000223979	SMCR2	lncRNA	Smith-Magenis syndrome chromosome region, candidate 2 [Source:HGNC Symbol;Acc:HGNC:17914]	Promoter,GeneBody	666	-	0.0453172	3.2	4.32	-1.12	0.0767	1
chr7:32946577-32947190					Intergenic	615		-0.101351	3.56	1.86	1.7	0.0767	1
chr17:4377417-4378253					Intergenic	838		-0.172897	4.31	3.14	1.17	0.0768	1
chr16:51257830-51258433	ENSG00000287256	AC137494.1	lncRNA	novel transcript	GeneBody	605	-	0.142857	2.88	4.11	-1.22	0.0769	1
chr10:61948128-61948661	ENSG00000150347	ARID5B	protein_coding	AT-rich interaction domain 5B [Source:HGNC Symbol;Acc:HGNC:17362]	GeneBody	535	+	-0.0887097	4.59	3.55	1.04	0.0769	1
chr8:144367274-144368721					Intergenic	1449		-0.0958512	5.05	3.74	1.32	0.077	1
chr22:23549974-23553224					Intergenic	3252		-0.891963	6.36	7.22	-0.86	0.0771	1
chr10:46085890-46086733					Intergenic	845		-0.09375	4.75	3.78	0.97	0.0772	1
chr8:109301495-109302233	ENSG00000120526	NUDCD1	protein_coding	NudC domain containing 1 [Source:HGNC Symbol;Acc:HGNC:24306]	GeneBody	740	-	-0.331536	3.07	4.24	-1.17	0.0773	1
chr2:85424025-85424544	ENSG00000286011	AC062037.4	lncRNA	novel transcript	GeneBody	521	+	-0.28839	3.57	2	1.57	0.0774	1
chr8:80158327-80159121					Intergenic	796		0.00266667	3	4.22	-1.22	0.0774	1
chr5:149715046-149715532					Intergenic	488		0.166667	2.33	3.72	-1.39	0.0774	1
chr20:9498449-9499702					Intergenic	1255		0.219048	3.77	4.7	-0.93	0.0775	1
chr3:14899065-14899457	ENSG00000154783	FGD5	protein_coding	FYVE, RhoGEF and PH domain containing 5 [Source:HGNC Symbol;Acc:HGNC:19117]	GeneBody	394	+	-0.412844	2.81	4.12	-1.31	0.0775	1
chr14:102104873-102105418	ENSG00000080824	HSP90AA1	protein_coding	heat shock protein 90 alpha family class A member 1 [Source:HGNC Symbol;Acc:HGNC:5253]	GeneBody	547	-	0.0381679	3.77	4.8	-1.03	0.0775	1
chr17:17744814-17745791	ENSG00000108557	RAI1	protein_coding	retinoic acid induced 1 [Source:HGNC Symbol;Acc:HGNC:9834]	GeneBody	979	+	0.178645	2.96	4.28	-1.32	0.0775	1
chr7:32595420-32596652					Intergenic	1234		-0.0921986	4.67	3.65	1.02	0.0776	1
chr11:70264112-70264876					Intergenic	766		0.00869565	4.09	2.39	1.7	0.0777	1
chr6:160856374-160858518					Intergenic	2146		-0.154348	4.49	5.36	-0.87	0.0777	1
chr1:116020222-116020724	ENSG00000163393	SLC22A15	protein_coding	solute carrier family 22 member 15 [Source:HGNC Symbol;Acc:HGNC:20301]	GeneBody	504	+	0.0458716	5	4.09	0.91	0.0778	1
chr19:49536085-49536721	ENSG00000142552	RCN3	protein_coding	reticulocalbin 3 [Source:HGNC Symbol;Acc:HGNC:21145]	GeneBody	638	+	-0.0987654	4.7	3.51	1.19	0.078	1
chr11:67341409-67342263					Intergenic	856		0.0466321	2.73	4.04	-1.31	0.0781	1
chr22:49581662-49582242					Intergenic	582		-0.679715	1.93	3.49	-1.57	0.0781	1
chr3:183334656-183335342	ENSG00000053524	MCF2L2	protein_coding	MCF.2 cell line derived transforming sequence-like 2 [Source:HGNC Symbol;Acc:HGNC:30319]	GeneBody	688	-	0.125	4.8	3.8	1	0.0781	1
chr2:120477735-120478275					Intergenic	542		-0.256757	1.77	3.49	-1.72	0.0781	1
chr3:113698292-113698804	ENSG00000176542	USF3	protein_coding	upstream transcription factor family member 3 [Source:HGNC Symbol;Acc:HGNC:30494]	Promoter	514	-	-0.255814	4.34	3.26	1.08	0.0781	1
chr15:85836169-85836877					Intergenic	710		0.106145	4.32	3.16	1.16	0.0782	1
chr4:39077292-39077936	ENSG00000109790	KLHL5	protein_coding	kelch like family member 5 [Source:HGNC Symbol;Acc:HGNC:6356]	GeneBody	646	+	0	3.2	4.29	-1.09	0.0784	1
chr20:57753830-57754921					Intergenic	1093		-0.212544	4.32	5.17	-0.85	0.0785	1
chr17:44845201-44845693					Intergenic	494		0.0382979	3.94	2.45	1.48	0.0786	1
chr3:141834140-141834956					Intergenic	818		-0.192612	3.36	4.43	-1.07	0.0787	1
chr12:95893023-95893823	ENSG00000165972	CCDC38	protein_coding	coiled-coil domain containing 38 [Source:HGNC Symbol;Acc:HGNC:26843]	GeneBody	802	-	-0.373134	4.39	3.1	1.29	0.0788	1
chr19:53727092-53728039					Intergenic	949		-0.0595483	5.12	4.04	1.08	0.0788	1
chr3:107523696-107524414	ENSG00000114439	BBX	protein_coding	BBX high mobility group box domain containing [Source:HGNC Symbol;Acc:HGNC:14422]	Promoter,GeneBody	720	+	0.316456	5.52	6.24	-0.73	0.0788	1
chr1:85289234-85289982	ENSG00000223653	AL078459.1	lncRNA	novel transcript	GeneBody	750	+	-0.13881	2.8	4.13	-1.33	0.0788	1
chr2:100246318-100246840	ENSG00000232084	LINC01104	lncRNA	long intergenic non-protein coding RNA 1104 [Source:HGNC Symbol;Acc:HGNC:49226]	GeneBody	524	+	0.38403	2.25	3.84	-1.6	0.079	1
chr7:158013316-158014968	ENSG00000155093	PTPRN2	protein_coding	protein tyrosine phosphatase receptor type N2 [Source:HGNC Symbol;Acc:HGNC:9677]	GeneBody	1654	-	-0.844612	4.36	5.22	-0.86	0.0792	1
chr12:123395425-123396132	ENSG00000183955	KMT5A	protein_coding	lysine methyltransferase 5A [Source:HGNC Symbol;Acc:HGNC:29489]	GeneBody	709	+	-0.0716332	4	2.7	1.3	0.0793	1
chr17:7668846-7669623	ENSG00000141510	TP53	protein_coding	tumor protein p53 [Source:HGNC Symbol;Acc:HGNC:11998]	GeneBody,Terminator	779	-	0.0242588	4.21	2.74	1.46	0.0794	1
chr12:120994669-120995781	ENSG00000135100	HNF1A	protein_coding	HNF1 homeobox A [Source:HGNC Symbol;Acc:HGNC:11621]	GeneBody	1114	+	-0.92963	3.75	4.8	-1.05	0.0795	1
chr1:151346832-151348032	ENSG00000237976	AL391069.2	lncRNA	novel transcript	Promoter,Terminator	1202	+	-0.0929134	3.66	4.67	-1.01	0.0795	1
chr10:119291561-119292572	ENSG00000198873	GRK5	protein_coding	G protein-coupled receptor kinase 5 [Source:HGNC Symbol;Acc:HGNC:4544]	GeneBody	1013	+	-0.82659	3.43	4.48	-1.06	0.0795	1
chr12:54357942-54359914	ENSG00000258137	AC079313.2	lncRNA	novel transcript, antisense to ZNF385A, GPR84, ITGA5 and GTSF1	GeneBody	1974	+	-0.0556079	4.7	5.59	-0.88	0.0796	1
chr5:32472040-32473535					Intergenic	1497		-0.017094	4.56	5.37	-0.81	0.0796	1
chr19:54644485-54645385					Intergenic	902		0.545679	-0.24	1.95	-2.19	0.0796	1
chr8:48192335-48193215					Intergenic	882		0.660455	3.54	4.52	-0.98	0.0796	1
chr3:149746453-149747158	ENSG00000114744	COMMD2	protein_coding	COMM domain containing 2 [Source:HGNC Symbol;Acc:HGNC:24993]	GeneBody	707	-	0.0920245	4.09	2.86	1.23	0.0797	1
chr22:50389132-50390322	ENSG00000100239	PPP6R2	protein_coding	protein phosphatase 6 regulatory subunit 2 [Source:HGNC Symbol;Acc:HGNC:19253]	GeneBody	1192	+	0.0652557	4.77	3.85	0.91	0.0797	1
chr16:2314675-2316748	ENSG00000167972	ABCA3	protein_coding	ATP binding cassette subfamily A member 3 [Source:HGNC Symbol;Acc:HGNC:33]	GeneBody	2075	-	-0.0233546	5.54	4.63	0.9	0.0797	1
chr11:92553549-92553987	ENSG00000165323	FAT3	protein_coding	FAT atypical cadherin 3 [Source:HGNC Symbol;Acc:HGNC:23112]	GeneBody	440	+	-0.25	1.31	3.4	-2.09	0.0798	1
chr2:107934853-107935344					Intergenic	493		0.427419	2.07	3.74	-1.66	0.0798	1
chr1:51206913-51208462	ENSG00000203356	LINC01562	lncRNA	long intergenic non-protein coding RNA 1562 [Source:HGNC Symbol;Acc:HGNC:51335]	GeneBody	1551	-	0.0692194	5.5	4.63	0.87	0.0799	1
chr3:111168873-111169375					Intergenic	504		-0.0805687	5.26	4.25	1.01	0.0799	1
chrX:150978349-150980131					Intergenic	1784		-0.0646221	4.69	3.55	1.14	0.0799	1
chrX:71025925-71026500					Intergenic	577		0.113636	3.8	2.14	1.66	0.0799	1
chr13:100421670-100422865	ENSG00000175198	PCCA	protein_coding	propionyl-CoA carboxylase subunit alpha [Source:HGNC Symbol;Acc:HGNC:8653]	GeneBody	1197	+	-0.186094	4.96	3.85	1.1	0.08	1
chr14:74571959-74572761	ENSG00000119681	LTBP2	protein_coding	latent transforming growth factor beta binding protein 2 [Source:HGNC Symbol;Acc:HGNC:6715]	GeneBody	804	-	-0.0284091	4.37	5.19	-0.82	0.0801	1
chr14:78917978-78918529	ENSG00000021645	NRXN3	protein_coding	neurexin 3 [Source:HGNC Symbol;Acc:HGNC:8010]	GeneBody	553	+	0.153846	5.19	4.22	0.97	0.0802	1
chr16:69756352-69757341	ENSG00000141101	NOB1	protein_coding	NIN1 (RPN12) binding protein 1 homolog [Source:HGNC Symbol;Acc:HGNC:29540]	Promoter	991	-	-0.0988142	4.28	3.12	1.16	0.0802	1
chr2:118951789-118952417	ENSG00000019169	MARCO	protein_coding	macrophage receptor with collagenous structure [Source:HGNC Symbol;Acc:HGNC:6895]	Promoter,GeneBody	630	+	-0.341615	3.38	4.47	-1.09	0.0802	1
chr8:102430436-102431048					Intergenic	614		0.00395257	4.61	3.47	1.14	0.0803	1
chr9:69170749-69171759	ENSG00000285130	AL358113.1	protein_coding	novel protein	GeneBody	1012	+	-0.328947	3.36	4.42	-1.06	0.0803	1
chr1:46607079-46607786	ENSG00000142961	MOB3C	protein_coding	MOB kinase activator 3C [Source:HGNC Symbol;Acc:HGNC:29800]	Terminator	709	-	-0.0769231	4.35	2.99	1.36	0.0804	1
chr9:127993800-127994197					Intergenic	399		-0.1	4.01	2.82	1.19	0.0805	1
chr1:229787643-229788576					Intergenic	935		0.396752	3.68	4.7	-1.02	0.0806	1
chr11:67759713-67761460	ENSG00000254447	OR7E11P	lncRNA	olfactory receptor family 7 subfamily E member 11 pseudogene [Source:HGNC Symbol;Acc:HGNC:8382]	GeneBody	1749	-	-0.396532	4.25	5.17	-0.93	0.0807	1
chr22:38619394-38619874	ENSG00000184949	FAM227A	protein_coding	family with sequence similarity 227 member A [Source:HGNC Symbol;Acc:HGNC:44197]	GeneBody	482	-	0.257143	2.62	4.02	-1.4	0.0807	1
chr13:111199583-111200594	ENSG00000102606	ARHGEF7	protein_coding	Rho guanine nucleotide exchange factor 7 [Source:HGNC Symbol;Acc:HGNC:15607]	GeneBody	1013	+	-0.0555556	2.87	4.1	-1.23	0.0807	1
chr11:66516112-66518594	ENSG00000256349	AP002748.5	protein_coding	novel protein	GeneBody	2484	+	-0.081826	5.94	5	0.94	0.0808	1
chr5:123460083-123460802					Intergenic	721		-0.21831	2.1	3.68	-1.57	0.0809	1
chr1:203576442-203577360					Intergenic	920		0.189189	3.51	4.48	-0.97	0.081	1
chr21:10705167-10706300					Intergenic	1135		-0.769697	2.69	4.04	-1.34	0.081	1
chr19:34906412-34907089	ENSG00000269037	LINC01838	lncRNA	long intergenic non-protein coding RNA 1838 [Source:HGNC Symbol;Acc:HGNC:52654]	Promoter,GeneBody	679	+	-0.178248	3.99	2.66	1.33	0.0811	1
chr3:178617268-178618069	ENSG00000275163	AC117457.1	protein_coding	potassium large conductance calcium-activated channel, subfamily M, beta member 2 (KCNMB2-IT1 - KCNMB2 readthrough transcript)	GeneBody	803	+	0.0308123	4.61	3.36	1.26	0.0811	1
chr6:91171190-91171998					Intergenic	810		0.293447	2.76	4.12	-1.36	0.0811	1
chr15:64951127-64955313	ENSG00000166839	ANKDD1A	protein_coding	ankyrin repeat and death domain containing 1A [Source:HGNC Symbol;Acc:HGNC:28002]	Promoter,GeneBody	4188	+	-0.809877	6.88	6.13	0.75	0.0811	1
chr9:83952698-83953336	ENSG00000165118	C9orf64	protein_coding	chromosome 9 open reading frame 64 [Source:HGNC Symbol;Acc:HGNC:28144]	GeneBody	640	-	0.149351	2.06	3.73	-1.66	0.0811	1
chr6:163087020-163087901	ENSG00000112530	PACRG	protein_coding	parkin coregulated [Source:HGNC Symbol;Acc:HGNC:19152]	GeneBody	883	+	0.592516	3.54	4.55	-1	0.0812	1
chr10:78028873-78029998	ENSG00000148606	POLR3A	protein_coding	RNA polymerase III subunit A [Source:HGNC Symbol;Acc:HGNC:30074]	Promoter	1127	-	-0.151414	3.69	4.68	-0.98	0.0812	1
chr14:71707714-71708322	ENSG00000197555	SIPA1L1	protein_coding	signal induced proliferation associated 1 like 1 [Source:HGNC Symbol;Acc:HGNC:20284]	GeneBody	610	+	0	4.01	2.7	1.31	0.0814	1
chr7:67786557-67786976					Intergenic	421		-0.185185	3.44	1.89	1.55	0.0814	1
chr14:102762635-102763992					Intergenic	1359		0.0300429	5.23	4.24	0.99	0.0814	1
chr18:31962262-31963322					Intergenic	1062		0.1673	4.08	2.75	1.33	0.0815	1
chr22:43280529-43282135	ENSG00000203527	Z99756.1	lncRNA	novel transcript	GeneBody	1608	+	-0.505071	3.19	4.48	-1.29	0.0815	1
chr6:116291912-116292413					Intergenic	503		0.488584	1.95	3.74	-1.79	0.0815	1
chr19:13213111-13213672	ENSG00000141837	CACNA1A	protein_coding	calcium voltage-gated channel subunit alpha1 A [Source:HGNC Symbol;Acc:HGNC:1388]	GeneBody	563	-	-0.306667	2.65	3.92	-1.28	0.0817	1
chr3:120844269-120844962	ENSG00000287366	AC072026.3	lncRNA	novel transcript	GeneBody	695	+	-0.174312	4.71	3.79	0.91	0.0818	1
chr11:47513388-47514163	ENSG00000149187	CELF1	protein_coding	CUGBP Elav-like family member 1 [Source:HGNC Symbol;Acc:HGNC:2549]	Promoter,GeneBody,Terminator	777	-	-0.179348	2.88	4.18	-1.3	0.0819	1
chrX:56351174-56352191					Intergenic	1019		0.306452	2.06	0.01	2.05	0.082	1
chr10:47402732-47403427					Intergenic	697		0.401575	3.93	4.98	-1.05	0.082	1
chr7:361342-362424					Intergenic	1084		-0.486842	0.5	2.67	-2.18	0.082	1
chr16:32645751-32647348					Intergenic	1599		-0.904077	3.66	2.04	1.62	0.0821	1
chr15:90300330-90300708	ENSG00000275674	AC091167.6	protein_coding	novel protein	GeneBody	380	+	-0.00502513	2.18	3.65	-1.48	0.0821	1
chrX:152601408-152601808	ENSG00000287394	AC244102.4	lncRNA	novel transcript, antisense to GABRQ	GeneBody	402	-	0.511364	1.69	3.42	-1.73	0.0821	1
chr17:78477769-78479042	ENSG00000187775	DNAH17	protein_coding	dynein axonemal heavy chain 17 [Source:HGNC Symbol;Acc:HGNC:2946]	GeneBody	1275	-	-0.747871	4.38	5.27	-0.89	0.0822	1
chr12:116454748-116455621					Intergenic	875		-0.118568	3.08	4.28	-1.2	0.0823	1
chr5:81383577-81384117	ENSG00000172497	ACOT12	protein_coding	acyl-CoA thioesterase 12 [Source:HGNC Symbol;Acc:HGNC:24436]	GeneBody	542	-	0.0982659	3.71	2	1.71	0.0824	1
chr19:48761193-48762468					Intergenic	1277		0.444156	3.4	4.5	-1.1	0.0824	1
chr10:1608043-1609022	ENSG00000185736	ADARB2	protein_coding	adenosine deaminase RNA specific B2 (inactive) [Source:HGNC Symbol;Acc:HGNC:227]	GeneBody	981	-	0.414317	4.51	3.53	0.98	0.0825	1
chr3:44507873-44509041	ENSG00000178917	ZNF852	protein_coding	zinc finger protein 852 [Source:HGNC Symbol;Acc:HGNC:27713]	GeneBody	1170	-	-0.00554529	4.81	3.87	0.94	0.0826	1
chr17:49216112-49217330	ENSG00000108798	ABI3	protein_coding	ABI family member 3 [Source:HGNC Symbol;Acc:HGNC:29859]	GeneBody	1220	+	-0.179811	2.57	4.04	-1.46	0.0826	1
chr2:87383017-87384796					Intergenic	1781		-0.0437788	-0.24	1.96	-2.2	0.0826	1
chr3:8870231-8870934					Intergenic	705		0.103825	2.56	4	-1.45	0.0827	1
chr18:590838-591230					Intergenic	394		-0.0645161	3.11	1.37	1.74	0.0828	1
chr4:180943407-180944225					Intergenic	820		-0.120448	4.29	3.08	1.21	0.0829	1
chr4:186607173-186607849	ENSG00000083857	FAT1	protein_coding	FAT atypical cadherin 1 [Source:HGNC Symbol;Acc:HGNC:3595]	GeneBody	678	-	0.5125	2.69	3.96	-1.27	0.0829	1
chr2:127637347-127639623	ENSG00000169994	MYO7B	protein_coding	myosin VIIB [Source:HGNC Symbol;Acc:HGNC:7607]	GeneBody,Terminator	2278	+	-0.00277778	4	5.08	-1.07	0.0829	1
chr12:47847292-47847875	ENSG00000111424	VDR	protein_coding	vitamin D receptor [Source:HGNC Symbol;Acc:HGNC:12679]	GeneBody	585	-	-0.29078	1.93	3.53	-1.6	0.0831	1
chr12:87748506-87752050					Intergenic	3546		0.0280778	1.87	-0.42	2.29	0.0831	1
chr4:48224971-48225717	ENSG00000135605	TEC	protein_coding	tec protein tyrosine kinase [Source:HGNC Symbol;Acc:HGNC:11719]	GeneBody	748	-	-0.122257	4.24	2.96	1.29	0.0832	1
chrX:130749985-130750966	ENSG00000165675	ENOX2	protein_coding	ecto-NOX disulfide-thiol exchanger 2 [Source:HGNC Symbol;Acc:HGNC:2259]	GeneBody	983	-	-0.325581	3.54	4.63	-1.09	0.0832	1
chr4:182814733-182816872					Intergenic	2141		-0.375231	3.5	4.54	-1.03	0.0832	1
chr2:30278672-30279273					Intergenic	603		-0.474403	1.96	3.56	-1.61	0.0832	1
chr9:128404201-128404981					Intergenic	782		0.0023753	2.95	4.22	-1.27	0.0834	1
chr5:179836299-179837187	ENSG00000161010	MRNIP	protein_coding	MRN complex interacting protein [Source:HGNC Symbol;Acc:HGNC:30817]	GeneBody,Terminator	890	-	-0.00618557	4.87	3.87	0.99	0.0834	1
chr16:16154720-16155755	ENSG00000091262	ABCC6	protein_coding	ATP binding cassette subfamily C member 6 [Source:HGNC Symbol;Acc:HGNC:57]	GeneBody	1037	-	-0.384045	3.42	4.55	-1.13	0.0836	1
chrX:65496593-65497207	ENSG00000102053	ZC3H12B	protein_coding	zinc finger CCCH-type containing 12B [Source:HGNC Symbol;Acc:HGNC:17407]	GeneBody	616	+	0.131148	4.91	3.92	0.99	0.0836	1
chr2:132393535-132394450					Intergenic	917		-0.645224	1.46	3.21	-1.76	0.0836	1
chr19:40880484-40881506	ENSG00000198077	CYP2A7	protein_coding	cytochrome P450 family 2 subfamily A member 7 [Source:HGNC Symbol;Acc:HGNC:2611]	GeneBody	1024	-	0.442274	2.92	4.24	-1.32	0.0837	1
chr10:46359566-46360093					Intergenic	529		0.137681	-0.24	2.06	-2.3	0.0837	1
chr3:9398131-9398836	ENSG00000168137	SETD5	protein_coding	SET domain containing 5 [Source:HGNC Symbol;Acc:HGNC:25566]	Promoter,GeneBody	707	+	-0.183246	2.95	4.22	-1.27	0.0839	1
chr7:1381484-1382211					Intergenic	729		-0.078125	4.33	3.08	1.25	0.0839	1
chr6:167654898-167655867	ENSG00000287297	AL356123.1	lncRNA	novel transcript	GeneBody	971	-	0.78308	3.62	4.74	-1.12	0.084	1
chr7:77025901-77027471	ENSG00000265479	DTX2P1-UPK3BP1-PMS2P11	lncRNA	DTX2P1-UPK3BP1-PMS2P11 readthrough, transcribed pseudogene [Source:HGNC Symbol;Acc:HGNC:42360]	GeneBody,Terminator	1572	+	0.251534	2.09	-0.03	2.12	0.084	1
chr1:240878045-240878489	ENSG00000182901	RGS7	protein_coding	regulator of G protein signaling 7 [Source:HGNC Symbol;Acc:HGNC:10003]	GeneBody	446	-	-0.376884	3.31	4.43	-1.12	0.0841	1
chr19:52784774-52786271	ENSG00000189190	ZNF600	protein_coding	zinc finger protein 600 [Source:HGNC Symbol;Acc:HGNC:30951]	Promoter,GeneBody	1499	-	-0.280632	5.06	5.86	-0.8	0.0842	1
chr17:56883535-56884072					Intergenic	539		-0.0746269	3.68	2.3	1.38	0.0842	1
chr15:72648921-72649402					Intergenic	483		-0.003861	-0.24	1.86	-2.1	0.0843	1
chr2:94283251-94284112					Intergenic	863		-0.715152	4.3	3.2	1.1	0.0843	1
chr6:99982493-99983280	ENSG00000152034	MCHR2	protein_coding	melanin concentrating hormone receptor 2 [Source:HGNC Symbol;Acc:HGNC:20867]	GeneBody	789	-	0.0773333	4.36	3.17	1.19	0.0844	1
chr9:113449923-113451217	ENSG00000138835	RGS3	protein_coding	regulator of G protein signaling 3 [Source:HGNC Symbol;Acc:HGNC:9999]	GeneBody	1296	+	0.153961	3.38	4.48	-1.1	0.0844	1
chrX:1210965-1212123	ENSG00000205755	CRLF2	protein_coding	cytokine receptor like factor 2 [Source:HGNC Symbol;Acc:HGNC:14281]	Promoter,GeneBody	1160	-	0.926874	2.2	3.64	-1.44	0.0846	1
chr7:157653130-157654443	ENSG00000155093	PTPRN2	protein_coding	protein tyrosine phosphatase receptor type N2 [Source:HGNC Symbol;Acc:HGNC:9677]	GeneBody	1315	-	-0.302663	3.22	1.05	2.17	0.0846	1
chr1:209402124-209403691					Intergenic	1569		0.294925	3.95	4.89	-0.93	0.0849	1
chr1:203467685-203468380					Intergenic	697		0.0786517	4.34	3.22	1.12	0.0849	1
chr1:220037533-220038548	ENSG00000136628	EPRS1	protein_coding	glutamyl-prolyl-tRNA synthetase 1 [Source:HGNC Symbol;Acc:HGNC:3418]	GeneBody	1017	-	-0.0070922	4.65	3.59	1.07	0.085	1
chr1:236034245-236034974	ENSG00000116962	NID1	protein_coding	nidogen 1 [Source:HGNC Symbol;Acc:HGNC:7821]	GeneBody	731	-	0.145833	4.54	3.54	1	0.0852	1
chr11:65680795-65681548					Intergenic	755		-0.085	3.3	4.48	-1.18	0.0853	1
chr2:37365632-37366145	ENSG00000115828	QPCT	protein_coding	glutaminyl-peptide cyclotransferase [Source:HGNC Symbol;Acc:HGNC:9753]	GeneBody	515	+	0.486486	1.71	3.63	-1.92	0.0853	1
chr22:21247866-21249285					Intergenic	1421		-0.214388	-0.24	2.06	-2.3	0.0853	1
chr3:6466981-6467774					Intergenic	795		0.564356	4.74	3.74	1	0.0854	1
chr8:133742205-133742977					Intergenic	774		0.60218	5.25	4.39	0.86	0.0854	1
chr2:26843678-26844643					Intergenic	967		-0.0897959	4.8	3.76	1.04	0.0856	1
chr21:43974017-43974974	ENSG00000160216	AGPAT3	protein_coding	1-acylglycerol-3-phosphate O-acyltransferase 3 [Source:HGNC Symbol;Acc:HGNC:326]	GeneBody	959	+	0.55665	3.94	2.61	1.33	0.0856	1
chr14:47691822-47692355					Intergenic	535		-0.707965	3.83	2.48	1.36	0.0856	1
chr12:104357969-104358495					Intergenic	528		-0.077551	3.99	2.66	1.33	0.0856	1
chr9:37909531-37910210	ENSG00000255872	AL138752.2	protein_coding	novel transcript	GeneBody	681	-	-0.174041	3.94	2.67	1.28	0.0857	1
chr9:93864191-93864842					Intergenic	653		-0.244186	3.27	4.33	-1.06	0.0857	1
chr8:144233357-144235387	ENSG00000179832	MROH1	protein_coding	maestro heat like repeat family member 1 [Source:HGNC Symbol;Acc:HGNC:26958]	GeneBody	2032	+	-0.164882	5.57	4.61	0.95	0.0858	1
chr1:106781311-106781859					Intergenic	550		0.736041	4.65	3.64	1.01	0.0858	1
chr3:184149373-184150850					Intergenic	1479		0.100402	4.15	2.84	1.32	0.0859	1
chr1:144550034-144552644					Intergenic	2612		-0.0297806	4.52	5.34	-0.82	0.086	1
chr1:30649747-30650378					Intergenic	633		-0.46087	2.43	3.82	-1.39	0.086	1
chr6:118728186-118728728					Intergenic	544		-0.231441	1.77	3.57	-1.8	0.0861	1
chr14:74781690-74782237	ENSG00000119596	YLPM1	protein_coding	YLP motif containing 1 [Source:HGNC Symbol;Acc:HGNC:17798]	GeneBody	549	+	-0.437086	3.8	4.83	-1.04	0.0861	1
chr16:56891007-56892481	ENSG00000070915	SLC12A3	protein_coding	solute carrier family 12 member 3 [Source:HGNC Symbol;Acc:HGNC:10912]	GeneBody	1476	+	0.181258	4.97	3.93	1.05	0.0862	1
chr1:148963457-148964181	ENSG00000178104	PDE4DIP	protein_coding	phosphodiesterase 4D interacting protein [Source:HGNC Symbol;Acc:HGNC:15580]	GeneBody	726	+	-0.037037	1.18	2.93	-1.75	0.0863	1
chr17:79658217-79658983					Intergenic	768		-0.447942	3.64	4.62	-0.98	0.0864	1
chr12:113547105-113547644					Intergenic	541		0.509677	2.69	3.98	-1.28	0.0864	1
chr10:12545301-12545867	ENSG00000183049	CAMK1D	protein_coding	calcium/calmodulin dependent protein kinase ID [Source:HGNC Symbol;Acc:HGNC:19341]	GeneBody	568	+	0.163763	4.38	3.31	1.07	0.0864	1
chr19:53977501-53981567	ENSG00000142408	CACNG8	protein_coding	calcium voltage-gated channel auxiliary subunit gamma 8 [Source:HGNC Symbol;Acc:HGNC:13628]	GeneBody	4068	+	0.257464	6.54	7.34	-0.79	0.0864	1
chr16:19478573-19479181	ENSG00000103534	TMC5	protein_coding	transmembrane channel like 5 [Source:HGNC Symbol;Acc:HGNC:22999]	GeneBody	610	+	-0.330645	2.61	3.89	-1.28	0.0865	1
chr12:48274252-48274934	ENSG00000258234	AC024257.1	lncRNA	novel transcript	GeneBody	684	-	0.0784314	2.17	3.63	-1.46	0.0865	1
chr10:80429319-80430118	ENSG00000122378	PRXL2A	protein_coding	peroxiredoxin like 2A [Source:HGNC Symbol;Acc:HGNC:28651]	GeneBody	801	+	-0.2194	4.05	4.93	-0.88	0.0866	1
chr3:111851001-111851959	ENSG00000286492	AC117509.1	lncRNA	novel transcript, antisense to PHLDB2and PLCXD2	GeneBody	960	-	-0.0599078	5.27	6.11	-0.84	0.0867	1
chr2:68305803-68306651	ENSG00000119865	CNRIP1	protein_coding	cannabinoid receptor interacting protein 1 [Source:HGNC Symbol;Acc:HGNC:24546]	GeneBody	850	-	0.11	4.37	2.91	1.46	0.0867	1
chr19:9799208-9799805	ENSG00000266950	AC008752.2	lncRNA	novel transcript	GeneBody	599	+	-0.172932	4.53	3.51	1.03	0.0867	1
chr12:32875339-32875872	ENSG00000057294	PKP2	protein_coding	plakophilin 2 [Source:HGNC Symbol;Acc:HGNC:9024]	GeneBody	535	-	0.544643	2.26	3.76	-1.51	0.0867	1
chr14:24314361-24315267	ENSG00000213903	LTB4R	protein_coding	leukotriene B4 receptor [Source:HGNC Symbol;Acc:HGNC:6713]	GeneBody	908	+	-0.144068	3.09	4.39	-1.29	0.087	1
chr8:114282909-114283627	ENSG00000254339	AC064802.1	lncRNA	novel transcript	Promoter,GeneBody	720	+	-0.520468	2.62	4.01	-1.39	0.087	1
chr22:29268000-29268364	ENSG00000100263	RHBDD3	protein_coding	rhomboid domain containing 3 [Source:HGNC Symbol;Acc:HGNC:1308]	Promoter	366	-	0.0884956	2.55	3.88	-1.33	0.0871	1
chr19:30170875-30171623					Intergenic	750		0.871951	4.64	3.51	1.13	0.0871	1
chr19:10844071-10845506					Intergenic	1437		0.0652819	4.66	3.41	1.25	0.0871	1
chr1:52663443-52664128					Intergenic	687		0.0644068	4.22	3.03	1.19	0.0872	1
chr14:37043012-37044254	ENSG00000183032	SLC25A21	protein_coding	solute carrier family 25 member 21 [Source:HGNC Symbol;Acc:HGNC:14411]	GeneBody	1244	-	-0.240741	3.98	4.92	-0.94	0.0873	1
chr17:82387611-82388104					Intergenic	495		0.351145	2.11	3.72	-1.62	0.0875	1
chr1:200505166-200505837					Intergenic	673		0.700855	5.46	4.66	0.8	0.0876	1
chr11:44803458-44804292	ENSG00000157570	TSPAN18	protein_coding	tetraspanin 18 [Source:HGNC Symbol;Acc:HGNC:20660]	GeneBody	836	+	0.128866	3.06	4.18	-1.11	0.0877	1
chr20:58197924-58198623					Intergenic	701		0.297158	2.46	4.04	-1.57	0.0877	1
chr6:36560878-36561814					Intergenic	938		-0.220779	3.47	4.5	-1.03	0.0877	1
chr20:1732218-1733183	ENSG00000286288	AL109809.4	lncRNA	novel transcript	GeneBody	967	-	0.337553	3.67	4.65	-0.98	0.0877	1
chr11:66027023-66028155	ENSG00000175294	CATSPER1	protein_coding	cation channel sperm associated 1 [Source:HGNC Symbol;Acc:HGNC:17116]	Promoter	1134	-	-0.155635	5.1	4.12	0.98	0.0878	1
chr20:5029522-5029919					Intergenic	399		0	2.11	3.59	-1.48	0.0879	1
chr2:232899052-232900883	ENSG00000066248	NGEF	protein_coding	neuronal guanine nucleotide exchange factor [Source:HGNC Symbol;Acc:HGNC:7807]	GeneBody	1833	-	-0.418224	2.6	3.87	-1.26	0.088	1
chr14:60254966-60255614	ENSG00000100614	PPM1A	protein_coding	protein phosphatase, Mg2+/Mn2+ dependent 1A [Source:HGNC Symbol;Acc:HGNC:9275]	GeneBody	650	+	-0.0915254	3.79	2.43	1.36	0.0882	1
chr2:25680675-25681406					Intergenic	733		-0.0898876	3.67	2.14	1.52	0.0883	1
chr11:65344042-65346356	ENSG00000133884	DPF2	protein_coding	double PHD fingers 2 [Source:HGNC Symbol;Acc:HGNC:9964]	GeneBody	2316	+	-0.0659253	4.87	3.79	1.08	0.0884	1
chr5:134257723-134258684	ENSG00000273345	AC104109.4	lncRNA	novel transcript	GeneBody	963	-	0.112644	4.33	3.17	1.16	0.0885	1
chr5:1657080-1657982					Intergenic	904		-0.043299	4.28	2.74	1.54	0.0885	1
chr9:122163799-122164451	ENSG00000185681	MORN5	protein_coding	MORN repeat containing 5 [Source:HGNC Symbol;Acc:HGNC:17841]	GeneBody	654	+	0.273927	3.55	1.95	1.61	0.0887	1
chr2:237967807-237968335	ENSG00000258984	UBE2F-SCLY	protein_coding	UBE2F-SCLY readthrough (NMD candidate) [Source:HGNC Symbol;Acc:HGNC:48339]	Promoter,GeneBody	530	+	0.279152	2.55	3.97	-1.42	0.0887	1
chrX:118904962-118905829					Intergenic	869		-0.471795	3.78	4.68	-0.9	0.0888	1
chr12:54409364-54410726	ENSG00000258137	AC079313.2	lncRNA	novel transcript, antisense to ZNF385A, GPR84, ITGA5 and GTSF1	GeneBody	1364	+	-0.0891365	4.65	3.41	1.24	0.0889	1
chr6:161779022-161779451	ENSG00000185345	PRKN	protein_coding	parkin RBR E3 ubiquitin protein ligase [Source:HGNC Symbol;Acc:HGNC:8607]	GeneBody	431	-	-0.178947	4.03	2.79	1.25	0.0889	1
chr19:11544064-11545115	ENSG00000130176	CNN1	protein_coding	calponin 1 [Source:HGNC Symbol;Acc:HGNC:2155]	GeneBody	1053	+	0.150943	4.83	3.81	1.02	0.089	1
chr17:2011113-2012036	ENSG00000185924	RTN4RL1	protein_coding	reticulon 4 receptor like 1 [Source:HGNC Symbol;Acc:HGNC:21329]	GeneBody	925	-	0.0851485	2.83	4.09	-1.26	0.089	1
chr1:175330518-175331110	ENSG00000260990	Z94057.1	lncRNA	novel transcript	GeneBody	594	+	-0.276923	2.75	4.04	-1.29	0.0891	1
chr5:157070242-157070825					Intergenic	585		-0.0756972	3.67	2.14	1.53	0.0893	1
chr8:142680645-142681609	ENSG00000167653	PSCA	protein_coding	prostate stem cell antigen [Source:HGNC Symbol;Acc:HGNC:9500]	Promoter,GeneBody	966	+	0.0146341	3.26	4.4	-1.15	0.0895	1
chr14:61178565-61179626					Intergenic	1063		0.196819	3.46	4.67	-1.21	0.0895	1
chr8:98138228-98138851	ENSG00000104356	POP1	protein_coding	POP1 homolog, ribonuclease P/MRP subunit [Source:HGNC Symbol;Acc:HGNC:30129]	GeneBody	625	+	-0.167286	2.93	4.11	-1.18	0.0897	1
chr2:29233551-29234226	ENSG00000171094	ALK	protein_coding	ALK receptor tyrosine kinase [Source:HGNC Symbol;Acc:HGNC:427]	GeneBody	677	-	0.146497	3.02	4.16	-1.14	0.0897	1
chr16:28913472-28913934	ENSG00000177548	RABEP2	protein_coding	rabaptin, RAB GTPase binding effector protein 2 [Source:HGNC Symbol;Acc:HGNC:24817]	GeneBody	464	-	-0.118644	3.92	2.66	1.26	0.0897	1
chr12:122665113-122665889					Intergenic	778		-0.295181	4.42	3.43	0.99	0.0897	1
chr7:74624700-74627001					Intergenic	2303		-0.113615	5.51	4.66	0.85	0.0899	1
chr20:4227235-4227769	ENSG00000171873	ADRA1D	protein_coding	adrenoceptor alpha 1D [Source:HGNC Symbol;Acc:HGNC:280]	GeneBody	536	-	-0.498099	3.14	4.22	-1.08	0.0899	1
chr10:97682629-97683742	ENSG00000119986	AVPI1	protein_coding	arginine vasopressin induced 1 [Source:HGNC Symbol;Acc:HGNC:30898]	GeneBody	1115	-	-0.0725806	3.54	1.78	1.76	0.0899	1
chr16:22193838-22194527					Intergenic	691		-0.315476	3.41	4.39	-0.98	0.09	1
chr2:23744982-23745452					Intergenic	472		0.249012	2.54	3.82	-1.28	0.0901	1
chr2:236447117-236447807	ENSG00000132321	IQCA1	protein_coding	IQ motif containing with AAA domain 1 [Source:HGNC Symbol;Acc:HGNC:26195]	GeneBody	692	-	0.0557185	2.44	3.93	-1.5	0.0902	1
chr11:76213729-76214684	ENSG00000255362	LINC02761	lncRNA	long intergenic non-protein coding RNA 2761 [Source:HGNC Symbol;Acc:HGNC:54281]	GeneBody	957	-	-0.037182	4.5	3.34	1.16	0.0902	1
chr7:27128864-27129647	ENSG00000197576	HOXA4	protein_coding	homeobox A4 [Source:HGNC Symbol;Acc:HGNC:5105]	Promoter,GeneBody,Terminator	785	-	0.2	3.28	4.32	-1.04	0.0902	1
chr19:35568390-35569004	ENSG00000283907	AD000090.1	lncRNA	novel transcript, antisense to ATP4A	GeneBody	616	+	0.0331126	3.76	2.41	1.35	0.0902	1
chr12:51279416-51279908	ENSG00000110934	BIN2	protein_coding	bridging integrator 2 [Source:HGNC Symbol;Acc:HGNC:1053]	Terminator	494	-	0.0275229	3.94	2.36	1.58	0.0903	1
chr3:108052364-108053709	ENSG00000196776	CD47	protein_coding	CD47 molecule [Source:HGNC Symbol;Acc:HGNC:1682]	GeneBody	1347	-	0.0396197	5.56	6.27	-0.7	0.0903	1
chr19:9954871-9955553					Intergenic	684		0.0588235	4.45	3.26	1.19	0.0904	1
chr12:121344042-121345127	ENSG00000089053	ANAPC5	protein_coding	anaphase promoting complex subunit 5 [Source:HGNC Symbol;Acc:HGNC:15713]	GeneBody	1087	-	0.30297	3.27	4.34	-1.07	0.0904	1
chr1:229578121-229578726					Intergenic	607		-0.414449	5.06	4.21	0.85	0.0905	1
chr5:55912370-55912995	ENSG00000164509	IL31RA	protein_coding	interleukin 31 receptor A [Source:HGNC Symbol;Acc:HGNC:18969]	GeneBody	627	+	0.0223642	1.86	3.47	-1.61	0.0906	1
chr16:48608124-48609067	ENSG00000102921	N4BP1	protein_coding	NEDD4 binding protein 1 [Source:HGNC Symbol;Acc:HGNC:29850]	GeneBody	945	-	0.0451306	2.46	4.04	-1.58	0.0906	1
chr1:10777880-10779233	ENSG00000130940	CASZ1	protein_coding	castor zinc finger 1 [Source:HGNC Symbol;Acc:HGNC:26002]	GeneBody	1355	-	-0.472	3.25	4.33	-1.08	0.0908	1
chr22:19943500-19943922	ENSG00000093010	COMT	protein_coding	catechol-O-methyltransferase [Source:HGNC Symbol;Acc:HGNC:2228]	Promoter,GeneBody	424	+	0.256039	1.91	3.44	-1.53	0.0908	1
chr20:37755741-37757095	ENSG00000132792	CTNNBL1	protein_coding	catenin beta like 1 [Source:HGNC Symbol;Acc:HGNC:15879]	GeneBody	1356	+	-0.146758	3.49	4.6	-1.11	0.0909	1
chr10:49621631-49622668	ENSG00000070748	CHAT	protein_coding	choline O-acetyltransferase [Source:HGNC Symbol;Acc:HGNC:1912]	GeneBody	1039	+	0.0394511	3.8	4.77	-0.97	0.091	1
chr1:209582629-209583093	ENSG00000008118	CAMK1G	protein_coding	calcium/calmodulin dependent protein kinase IG [Source:HGNC Symbol;Acc:HGNC:14585]	Promoter	466	+	0.427273	2.72	4.06	-1.34	0.091	1
chr7:28685529-28686495	ENSG00000146592	CREB5	protein_coding	cAMP responsive element binding protein 5 [Source:HGNC Symbol;Acc:HGNC:16844]	GeneBody	968	+	-0.136659	3.81	4.72	-0.91	0.091	1
chr7:152913908-152915390					Intergenic	1484		-0.594295	4.36	5.21	-0.85	0.091	1
chr19:12759923-12762041	ENSG00000095066	HOOK2	protein_coding	hook microtubule tethering protein 2 [Source:HGNC Symbol;Acc:HGNC:19885]	Terminator	2120	-	-0.187387	5.45	4.54	0.91	0.091	1
chr10:97316534-97318954	ENSG00000165879	FRAT1	protein_coding	FRAT regulator of WNT signaling pathway 1 [Source:HGNC Symbol;Acc:HGNC:3944]	Promoter	2422	+	-0.0513699	5.54	4.35	1.19	0.0911	1
chr8:133687058-133687603					Intergenic	547		-0.123404	2.2	3.73	-1.53	0.0912	1
chr10:6259150-6259865					Intergenic	717		-0.76947	2.97	4.11	-1.15	0.0914	1
chr11:69016228-69017319	ENSG00000256508	MRGPRF-AS1	lncRNA	MRGPRF antisense RNA 1 [Source:HGNC Symbol;Acc:HGNC:51140]	GeneBody	1093	+	-0.543396	2.98	4.38	-1.4	0.0916	1
chr3:192909524-192910563	ENSG00000180611	MB21D2	protein_coding	Mab-21 domain containing 2 [Source:HGNC Symbol;Acc:HGNC:30438]	GeneBody	1041	-	0.109208	4.85	3.79	1.07	0.0916	1
chr12:11636788-11637388					Intergenic	602		-0.106529	4.57	3.41	1.16	0.0917	1
chr9:137266746-137268073	ENSG00000188986	NELFB	protein_coding	negative elongation factor complex member B [Source:HGNC Symbol;Acc:HGNC:24324]	GeneBody	1329	+	0.134591	4.83	3.75	1.08	0.0917	1
chr5:172453359-172454062	ENSG00000174705	SH3PXD2B	protein_coding	SH3 and PX domains 2B [Source:HGNC Symbol;Acc:HGNC:29242]	Promoter,GeneBody	705	-	0.0121655	3.07	4.19	-1.12	0.0917	1
chr19:12691827-12692510	ENSG00000132004	FBXW9	protein_coding	F-box and WD repeat domain containing 9 [Source:HGNC Symbol;Acc:HGNC:28136]	GeneBody	685	-	-0.109859	3.9	2.48	1.41	0.0917	1
chr3:134471056-134472337					Intergenic	1283		0.120253	3.45	4.48	-1.03	0.0918	1
chr9:81851779-81852603					Intergenic	826		-0.015544	3.79	2.06	1.74	0.0919	1
chr5:149313915-149314404	ENSG00000157510	AFAP1L1	protein_coding	actin filament associated protein 1 like 1 [Source:HGNC Symbol;Acc:HGNC:26714]	GeneBody	491	+	0.300752	2.85	4	-1.15	0.092	1
chr13:113965631-113966850	ENSG00000283199	C13orf46	protein_coding	chromosome 13 open reading frame 46 [Source:HGNC Symbol;Acc:HGNC:53786]	GeneBody	1221	-	0.869307	3.98	4.91	-0.92	0.092	1
chr16:74401758-74404007					Intergenic	2251		-0.0321429	2.75	0.76	1.99	0.0922	1
chr10:74791754-74792744					Intergenic	992		0.0607477	5.05	4.19	0.86	0.0922	1
chr12:27997802-27998258					Intergenic	458		0.105769	2.84	4.03	-1.19	0.0922	1
chr7:139503057-139503783					Intergenic	728		0.142012	4.45	3.39	1.06	0.0922	1
chr2:238206874-238207873					Intergenic	1001		0.391304	3.33	4.44	-1.11	0.0923	1
chr18:12377303-12377874	ENSG00000141385	AFG3L2	protein_coding	AFG3 like matrix AAA peptidase subunit 2 [Source:HGNC Symbol;Acc:HGNC:315]	Promoter	573	-	0.359801	1.94	3.69	-1.75	0.0923	1
chr2:106446275-106446881	ENSG00000153165	RGPD3	protein_coding	RANBP2 like and GRIP domain containing 3 [Source:HGNC Symbol;Acc:HGNC:32416]	GeneBody	608	-	0.0914634	0.24	2.15	-1.91	0.0923	1
chr19:45607019-45607994	ENSG00000125746	EML2	protein_coding	EMAP like 2 [Source:HGNC Symbol;Acc:HGNC:18035]	Terminator	977	-	0.114983	1.94	3.68	-1.74	0.0924	1
chr17:5240048-5241346	ENSG00000263164	AC087500.2	lncRNA	novel transcript	Promoter,Terminator	1300	-	-0.6	0.17	2.13	-1.95	0.0924	1
chr5:177081380-177081958	ENSG00000113761	ZNF346	protein_coding	zinc finger protein 346 [Source:HGNC Symbol;Acc:HGNC:16403]	Terminator	580	+	0.127148	3	4.11	-1.11	0.0924	1
chr2:42627047-42628334	ENSG00000057935	MTA3	protein_coding	metastasis associated 1 family member 3 [Source:HGNC Symbol;Acc:HGNC:23784]	GeneBody	1289	+	-0.0843373	4.64	3.59	1.05	0.0924	1
chr17:2535306-2536002					Intergenic	698		0.14881	4.16	2.93	1.23	0.0924	1
chrX:129851443-129852278					Intergenic	837		0.126685	3.35	4.38	-1.04	0.0925	1
chr5:67338910-67339756					Intergenic	848		-0.7	4.97	4.16	0.81	0.0925	1
chr7:142960117-142960509	ENSG00000197993	KEL	protein_coding	Kell metallo-endopeptidase (Kell blood group) [Source:HGNC Symbol;Acc:HGNC:6308]	GeneBody	394	-	-0.0659341	2.54	3.83	-1.29	0.0926	1
chr14:76029420-76029871	ENSG00000119650	IFT43	protein_coding	intraflagellar transport 43 [Source:HGNC Symbol;Acc:HGNC:29669]	GeneBody	453	+	0.0326797	5.09	3.86	1.23	0.0926	1
chr1:52243194-52243971	ENSG00000157077	ZFYVE9	protein_coding	zinc finger FYVE-type containing 9 [Source:HGNC Symbol;Acc:HGNC:6775]	GeneBody	779	+	0.255014	3.54	4.53	-0.98	0.0927	1
chr8:29431430-29432324					Intergenic	896		0.26601	4.71	3.77	0.93	0.0927	1
chr2:31964780-31965483	ENSG00000162959	MEMO1	protein_coding	mediator of cell motility 1 [Source:HGNC Symbol;Acc:HGNC:14014]	GeneBody	705	-	0.373802	2.89	4.17	-1.27	0.0928	1
chr1:91569413-91570068					Intergenic	657		0.26506	3.16	4.23	-1.07	0.0928	1
chr22:37598259-37599752					Intergenic	1495		-0.0602056	5.06	4.11	0.95	0.0928	1
chr6:3144028-3146226	ENSG00000137274	BPHL	protein_coding	biphenyl hydrolase like [Source:HGNC Symbol;Acc:HGNC:1094]	GeneBody	2200	+	0.352756	4.74	3.72	1.03	0.0929	1
chr12:127357739-127358242					Intergenic	505		-0.212435	3.54	2.08	1.47	0.0929	1
chr14:102876580-102877361	ENSG00000131323	TRAF3	protein_coding	TNF receptor associated factor 3 [Source:HGNC Symbol;Acc:HGNC:12033]	GeneBody	783	+	-0.414894	3.18	4.29	-1.11	0.0929	1
chr5:177445601-177446113	ENSG00000246334	PRR7-AS1	lncRNA	PRR7 antisense RNA 1 [Source:HGNC Symbol;Acc:HGNC:27961]	Promoter,GeneBody	514	-	-0.0862069	4.77	3.85	0.92	0.093	1
chr1:155274489-155275841	ENSG00000176444	CLK2	protein_coding	CDC like kinase 2 [Source:HGNC Symbol;Acc:HGNC:2069]	Promoter	1354	-	0.125749	5.1	4.23	0.87	0.0932	1
chr11:59174019-59174626	ENSG00000110042	DTX4	protein_coding	deltex E3 ubiquitin ligase 4 [Source:HGNC Symbol;Acc:HGNC:29151]	GeneBody	609	+	0.294498	3.03	4.28	-1.25	0.0932	1
chr3:184634478-184637119					Intergenic	2643		-0.00274725	4.85	5.82	-0.97	0.0933	1
chr6:41465979-41466646					Intergenic	669		0.290123	3.37	4.43	-1.06	0.0933	1
chr1:115539544-115540165					Intergenic	623		0.291228	3.46	4.62	-1.16	0.0935	1
chr3:184243845-184245191	ENSG00000214160	ALG3	protein_coding	ALG3 alpha-1,3- mannosyltransferase [Source:HGNC Symbol;Acc:HGNC:23056]	GeneBody,Terminator	1348	-	0.0841379	3.27	4.35	-1.08	0.0937	1
chr3:110087361-110087853					Intergenic	494		0.229947	5.5	4.62	0.88	0.0938	1
chr10:25724066-25724792	ENSG00000280809	LINC00836	lncRNA	long intergenic non-protein coding RNA 836 [Source:HGNC Symbol;Acc:HGNC:44915]	GeneBody	728	+	0.359756	4.47	3.21	1.25	0.0938	1
chr16:51895822-51896454					Intergenic	634		-0.00425532	3.9	2.62	1.28	0.094	1
chr12:3551649-3552492	ENSG00000111218	PRMT8	protein_coding	protein arginine methyltransferase 8 [Source:HGNC Symbol;Acc:HGNC:5188]	GeneBody	845	+	0.180995	3.71	4.63	-0.93	0.094	1
chrX:134751394-134751817					Intergenic	425		-0.454545	2.09	3.63	-1.54	0.0941	1
chr12:109812226-109813606	ENSG00000111199	TRPV4	protein_coding	transient receptor potential cation channel subfamily V member 4 [Source:HGNC Symbol;Acc:HGNC:18083]	GeneBody	1382	-	0.451299	4.21	5.03	-0.82	0.0942	1
chr7:653849-654914	ENSG00000188191	PRKAR1B	protein_coding	protein kinase cAMP-dependent type I regulatory subunit beta [Source:HGNC Symbol;Acc:HGNC:9390]	GeneBody	1067	-	-0.926407	4.48	5.32	-0.84	0.0942	1
chr17:79229247-79229859	ENSG00000167281	RBFOX3	protein_coding	RNA binding fox-1 homolog 3 [Source:HGNC Symbol;Acc:HGNC:27097]	GeneBody	614	-	0.0860927	4.07	2.88	1.19	0.0943	1
chr1:161322499-161324121	ENSG00000143252	SDHC	protein_coding	succinate dehydrogenase complex subunit C [Source:HGNC Symbol;Acc:HGNC:10682]	GeneBody	1624	+	-0.0576923	4.92	4.02	0.9	0.0943	1
chr12:128681551-128682158	ENSG00000181234	TMEM132C	protein_coding	transmembrane protein 132C [Source:HGNC Symbol;Acc:HGNC:25436]	GeneBody	609	+	-0.0853242	3.69	2.14	1.54	0.0943	1
chr7:100756909-100758777	ENSG00000146839	ZAN	protein_coding	zonadhesin (gene/pseudogene) [Source:HGNC Symbol;Acc:HGNC:12857]	GeneBody	1870	+	0.0565657	5.1	4.15	0.94	0.0944	1
chr1:87547808-87548537					Intergenic	731		-0.0402477	4.58	3.62	0.96	0.0944	1
chr8:85892503-85893110	ENSG00000253154	AC100801.1	lncRNA	novel transcript	GeneBody	609	+	0.303965	3.78	2.04	1.74	0.0945	1
chr2:1281227-1281716	ENSG00000172554	SNTG2	protein_coding	syntrophin gamma 2 [Source:HGNC Symbol;Acc:HGNC:13741]	GeneBody	491	+	0.606838	3.76	2.24	1.52	0.0945	1
chr1:239684352-239685057	ENSG00000133019	CHRM3	protein_coding	cholinergic receptor muscarinic 3 [Source:HGNC Symbol;Acc:HGNC:1952]	GeneBody	707	+	0.339806	3.62	4.56	-0.94	0.0945	1
chr1:161641949-161642510					Intergenic	563		0.141667	-0.24	1.76	-2	0.0946	1
chr3:10157187-10158495					Intergenic	1310		-0.0228758	5.16	4.14	1.02	0.0946	1
chr12:31897533-31899148	ENSG00000255760	LINC02422	lncRNA	long intergenic non-protein coding RNA 2422 [Source:HGNC Symbol;Acc:HGNC:53352]	GeneBody	1617	-	0.219381	5.21	5.91	-0.7	0.0947	1
chr16:29445425-29446216	ENSG00000261740	BOLA2-SMG1P6	protein_coding	BOLA2-SMG1P6 readthrough [Source:HGNC Symbol;Acc:HGNC:53563]	GeneBody	793	-	0.0798898	0.11	2.23	-2.12	0.0948	1
chr9:127487960-127489204	ENSG00000148356	LRSAM1	protein_coding	leucine rich repeat and sterile alpha motif containing 1 [Source:HGNC Symbol;Acc:HGNC:25135]	GeneBody	1246	+	-0.110092	4.72	3.52	1.19	0.0949	1
chr3:8965793-8966301					Intergenic	510		-0.0545455	2.76	4.1	-1.34	0.095	1
chr20:44358143-44358652					Intergenic	511		-0.0176991	4.17	2.94	1.23	0.095	1
chr13:87582322-87582750					Intergenic	430		-0.456954	4.6	3.69	0.91	0.0951	1
chr11:32461700-32462381					Intergenic	683		0.135889	4.36	3.08	1.28	0.0952	1
chr12:101149737-101153947	ENSG00000256870	SLC5A8	protein_coding	solute carrier family 5 member 8 [Source:HGNC Symbol;Acc:HGNC:19119]	Terminator	4212	-	-0.0671551	1.76	-0.42	2.17	0.0952	1
chr9:106862544-106864786	ENSG00000148143	ZNF462	protein_coding	zinc finger protein 462 [Source:HGNC Symbol;Acc:HGNC:21684]	Promoter,GeneBody	2244	+	0.116743	5.06	5.88	-0.82	0.0953	1
chr12:64570934-64571524					Intergenic	592		0.0989761	4.13	2.91	1.22	0.0953	1
chr5:107166518-107167196					Intergenic	680		0.01875	2.55	3.94	-1.38	0.0954	1
chr1:201087414-201088048	ENSG00000081248	CACNA1S	protein_coding	calcium voltage-gated channel subunit alpha1 S [Source:HGNC Symbol;Acc:HGNC:1397]	GeneBody	636	-	-0.138028	2.95	4.22	-1.27	0.0954	1
chr9:130324209-130325101	ENSG00000148357	HMCN2	protein_coding	hemicentin 2 [Source:HGNC Symbol;Acc:HGNC:21293]	GeneBody	894	+	-0.119221	4.47	3.24	1.23	0.0954	1
chr17:8682015-8682565					Intergenic	552		-0.183206	3.49	1.91	1.58	0.0954	1
chr17:26858929-26859640					Intergenic	713		0.562724	0.5	2.52	-2.03	0.0954	1
chr19:17624646-17626426	ENSG00000130477	UNC13A	protein_coding	unc-13 homolog A [Source:HGNC Symbol;Acc:HGNC:23150]	GeneBody	1782	-	-0.292597	4.63	5.42	-0.79	0.0954	1
chr3:134374629-134375717	ENSG00000114019	AMOTL2	protein_coding	angiomotin like 2 [Source:HGNC Symbol;Acc:HGNC:17812]	Promoter	1090	-	-0.161994	3.86	4.97	-1.11	0.0955	1
chr4:48955031-48955602					Intergenic	573		-0.485507	2.61	3.91	-1.3	0.0956	1
chr17:11260318-11261176	ENSG00000188803	SHISA6	protein_coding	shisa family member 6 [Source:HGNC Symbol;Acc:HGNC:34491]	GeneBody	860	+	-0.195556	3.48	4.46	-0.99	0.0957	1
chr16:48047023-48047906					Intergenic	885		0.334783	3.77	4.75	-0.98	0.0958	1
chr6:135956509-135957001	ENSG00000171408	PDE7B	protein_coding	phosphodiesterase 7B [Source:HGNC Symbol;Acc:HGNC:8792]	GeneBody	494	+	0.230088	2.67	3.92	-1.25	0.0958	1
chr12:109008504-109009059	ENSG00000166111	SVOP	protein_coding	SV2 related protein [Source:HGNC Symbol;Acc:HGNC:25417]	GeneBody	557	-	-0.0330579	3.3	1.61	1.69	0.0958	1
chr12:125566586-125567580	ENSG00000139364	TMEM132B	protein_coding	transmembrane protein 132B [Source:HGNC Symbol;Acc:HGNC:29397]	GeneBody	996	+	-0.212245	3.4	4.56	-1.16	0.0958	1
chr16:4285294-4286361					Intergenic	1069		0.0755064	4.12	2.63	1.5	0.0959	1
chr12:111713305-111714265	ENSG00000111271	ACAD10	protein_coding	acyl-CoA dehydrogenase family member 10 [Source:HGNC Symbol;Acc:HGNC:21597]	GeneBody	962	+	0.123967	3.07	4.33	-1.26	0.096	1
chr14:22818032-22818855					Intergenic	825		-0.0635294	3.95	2.71	1.24	0.0961	1
chr2:131159830-131160349					Intergenic	521		-0.147826	4.35	3.13	1.22	0.0961	1
chr8:23450618-23451208	ENSG00000197217	ENTPD4	protein_coding	ectonucleoside triphosphate diphosphohydrolase 4 [Source:HGNC Symbol;Acc:HGNC:14573]	GeneBody	592	-	-0.328358	1.58	3.3	-1.72	0.0961	1
chr6:40983034-40983813					Intergenic	781		-0.40678	3.55	4.51	-0.96	0.0962	1
chr14:75547130-75547633	ENSG00000156127	BATF	protein_coding	basic leucine zipper ATF-like transcription factor [Source:HGNC Symbol;Acc:HGNC:958]	Terminator	505	+	-0.333333	3.85	4.79	-0.94	0.0963	1
chr17:39685327-39686109	ENSG00000161395	PGAP3	protein_coding	post-GPI attachment to proteins phospholipase 3 [Source:HGNC Symbol;Acc:HGNC:23719]	GeneBody	784	-	-0.0558376	3.17	4.31	-1.15	0.0964	1
chr19:3475069-3476195	ENSG00000095932	SMIM24	protein_coding	small integral membrane protein 24 [Source:HGNC Symbol;Acc:HGNC:37244]	GeneBody	1128	-	0.656192	3.17	4.25	-1.08	0.0965	1
chr15:92799170-92801200					Intergenic	2032		-0.0213675	5.33	4.52	0.81	0.0966	1
chr5:41844548-41845327	ENSG00000083720	OXCT1	protein_coding	3-oxoacid CoA-transferase 1 [Source:HGNC Symbol;Acc:HGNC:8527]	GeneBody	781	-	-0.477778	4.01	4.91	-0.9	0.0966	1
chr7:3008510-3009674	ENSG00000198286	CARD11	protein_coding	caspase recruitment domain family member 11 [Source:HGNC Symbol;Acc:HGNC:16393]	GeneBody	1166	-	0.169877	3.62	4.54	-0.92	0.0966	1
chr10:102318994-102319910	ENSG00000107862	GBF1	protein_coding	golgi brefeldin A resistant guanine nucleotide exchange factor 1 [Source:HGNC Symbol;Acc:HGNC:4181]	GeneBody	918	+	-0.0997567	4.32	3.33	0.99	0.0967	1
chr14:76562232-76562751	ENSG00000259124	AC008050.1	lncRNA	novel transcript	GeneBody	521	-	0.242424	2.74	4.08	-1.34	0.0967	1
chr9:97741711-97742565	ENSG00000260677	AL445531.1	lncRNA	novel transcript	Promoter,GeneBody	856	+	0.266667	4.42	3.32	1.1	0.0967	1
chr1:164860701-164861110					Intergenic	411		0.373626	2.35	3.7	-1.34	0.0967	1
chr17:45374000-45375137	ENSG00000267446	AC003070.2	lncRNA	novel transcript	Promoter	1139	-	-0.0928962	3.02	4.27	-1.26	0.0968	1
chr6:34567704-34568386					Intergenic	684		-0.0163934	3.28	4.33	-1.05	0.0969	1
chr3:96001722-96002096					Intergenic	376		0.0218978	2.83	1.01	1.83	0.0969	1
chr10:75498903-75499329	ENSG00000148655	LRMDA	protein_coding	leucine rich melanocyte differentiation associated [Source:HGNC Symbol;Acc:HGNC:23405]	GeneBody	428	+	0.194444	2.51	3.88	-1.37	0.0969	1
chr12:113210361-113211427	ENSG00000166578	IQCD	protein_coding	IQ motif containing D [Source:HGNC Symbol;Acc:HGNC:25168]	GeneBody	1068	-	-0.0733753	3.14	4.33	-1.19	0.097	1
chr11:65499139-65500810	ENSG00000251562	MALAT1	lncRNA	metastasis associated lung adenocarcinoma transcript 1 [Source:HGNC Symbol;Acc:HGNC:29665]	Promoter,GeneBody	1673	+	0.373573	5.62	6.29	-0.67	0.097	1
chr10:46305649-46306829	ENSG00000274209	ANTXRL	protein_coding	ANTXR like [Source:HGNC Symbol;Acc:HGNC:27277]	GeneBody	1182	+	-0.170475	3.74	4.96	-1.22	0.0971	1
chr7:142375425-142376194					Intergenic	771		0.192802	3.47	4.57	-1.1	0.0971	1
chr2:95046196-95047180	ENSG00000172005	MAL	protein_coding	mal, T cell differentiation protein [Source:HGNC Symbol;Acc:HGNC:6817]	GeneBody	986	+	0.294845	4.73	3.72	1.01	0.0972	1
chr13:44930458-44931302					Intergenic	846		-0.212411	2.63	3.95	-1.33	0.0972	1
chr1:90958091-90958676	ENSG00000122482	ZNF644	protein_coding	zinc finger protein 644 [Source:HGNC Symbol;Acc:HGNC:29222]	GeneBody	587	-	-0.058296	3.68	2.18	1.5	0.0973	1
chr10:38521712-38522394					Intergenic	684		0.582734	3.44	4.62	-1.18	0.0975	1
chr3:14923969-14924755	ENSG00000154783	FGD5	protein_coding	FYVE, RhoGEF and PH domain containing 5 [Source:HGNC Symbol;Acc:HGNC:19117]	GeneBody	788	+	-0.143577	3.74	2.44	1.3	0.0975	1
chr4:38321849-38322288					Intergenic	441		0.336634	2.84	4.02	-1.18	0.0975	1
chr16:14192845-14193501	ENSG00000262529	AC130650.1	lncRNA	novel transcript, antisense to MKL2	GeneBody	658	-	-0.316614	3.59	2.23	1.37	0.0977	1
chr9:107726341-107727126					Intergenic	787		-0.142857	4.35	3.33	1.02	0.0977	1
chr2:133810316-133812100					Intergenic	1786		0.614534	5.85	5.14	0.71	0.0978	1
chr1:244931499-244932118					Intergenic	621		-0.164912	3.48	4.43	-0.95	0.0978	1
chr17:19081522-19082491	ENSG00000230197	AC007952.3	lncRNA	novel transcript	GeneBody	971	+	0.218684	2.22	0.27	1.96	0.0979	1
chr5:80398007-80398739					Intergenic	734		-0.059761	4.13	2.97	1.16	0.0979	1
chr19:47470406-47472187	ENSG00000287896	AC073548.2	lncRNA	novel transcript, antisense to KPTNand SLC8A2	Promoter,GeneBody	1783	+	0.2265	4.26	5.16	-0.9	0.098	1
chr5:8029564-8030245					Intergenic	683		0.121795	3.88	4.79	-0.91	0.0981	1
chr1:150222096-150223624	ENSG00000143401	ANP32E	protein_coding	acidic nuclear phosphoprotein 32 family member E [Source:HGNC Symbol;Acc:HGNC:16673]	GeneBody	1530	-	0.0304976	4.97	3.98	0.99	0.0981	1
chr16:46992930-46993520					Intergenic	592		0.00719424	3.63	4.58	-0.94	0.0982	1
chr6:41894332-41895185	ENSG00000164663	USP49	protein_coding	ubiquitin specific peptidase 49 [Source:HGNC Symbol;Acc:HGNC:20078]	Promoter	855	-	-0.509728	4	4.93	-0.93	0.0982	1
chr17:48515674-48516414					Intergenic	742		0.323864	3.09	4.2	-1.11	0.0982	1
chr5:138480291-138481561					Intergenic	1272		-0.00165837	4.44	3.29	1.14	0.0983	1
chr7:104093112-104093543					Intergenic	433		-0.12037	2.34	3.68	-1.33	0.0983	1
chr19:17819576-17820362	ENSG00000248099	INSL3	protein_coding	insulin like 3 [Source:HGNC Symbol;Acc:HGNC:6086]	GeneBody	788	-	0.0923483	4.03	2.61	1.42	0.0983	1
chr2:40035343-40035765					Intergenic	424		-0.215909	4.47	3.54	0.93	0.0984	1
chr2:105655871-105656801					Intergenic	932		-0.469945	5.2	4.35	0.84	0.0984	1
chr14:70339503-70340124	ENSG00000133983	COX16	protein_coding	cytochrome c oxidase assembly factor COX16 [Source:HGNC Symbol;Acc:HGNC:20213]	GeneBody	623	-	-0.56044	2.07	3.61	-1.54	0.0985	1
chr10:50014441-50014938					Intergenic	499		-0.0666667	1.89	3.4	-1.51	0.0986	1
chr11:27158969-27159673	ENSG00000254560	BBOX1-AS1	lncRNA	BBOX1 antisense RNA 1 [Source:HGNC Symbol;Acc:HGNC:50700]	GeneBody	706	-	0.0214286	1.94	3.55	-1.62	0.0986	1
chr7:76257448-76259337	ENSG00000177679	SRRM3	protein_coding	serine/arginine repetitive matrix 3 [Source:HGNC Symbol;Acc:HGNC:26729]	GeneBody	1891	+	0.179386	5.8	4.94	0.86	0.0986	1
chr1:31957590-31958711					Intergenic	1123		-0.370504	4.83	5.54	-0.71	0.0988	1
chr3:109361342-109362255					Intergenic	915		-0.12854	5.79	4.8	0.98	0.0988	1
chr20:9241228-9241667					Intergenic	441		-0.132948	3.05	4.35	-1.3	0.0988	1
chr20:51546743-51548300					Intergenic	1559		-0.0614379	4	5	-0.99	0.0988	1
chr11:94349534-94354410					Intergenic	4878		-0.369361	2.76	4.12	-1.36	0.0989	1
chr11:71633464-71633864					Intergenic	402		-0.446154	1.5	3.1	-1.6	0.099	1
chr11:3206023-3207033					Intergenic	1012		0.305816	3.26	4.36	-1.1	0.099	1
chr16:67010179-67010653	ENSG00000172824	CES4A	protein_coding	carboxylesterase 4A [Source:HGNC Symbol;Acc:HGNC:26741]	Terminator	476	+	-0.0762332	4.05	2.83	1.22	0.0991	1
chr8:101158719-101159552					Intergenic	835		0.258706	3.68	4.6	-0.93	0.0991	1
chr8:127619530-127621023					Intergenic	1495		0.212598	4.41	5.3	-0.89	0.0991	1
chr7:4124627-4125616	ENSG00000146555	SDK1	protein_coding	sidekick cell adhesion molecule 1 [Source:HGNC Symbol;Acc:HGNC:19307]	GeneBody	991	+	0.727473	3.81	4.81	-1	0.0991	1
chr7:132191326-132192855	ENSG00000221866	PLXNA4	protein_coding	plexin A4 [Source:HGNC Symbol;Acc:HGNC:9102]	GeneBody	1531	-	0.130194	3.77	4.67	-0.9	0.0991	1
chr10:29870307-29870952					Intergenic	647		-0.953642	3.63	4.65	-1.02	0.0992	1
chr1:182316278-182316937					Intergenic	661		0.546392	4.28	3.25	1.02	0.0992	1
chr2:122148068-122148525					Intergenic	459		0.408867	2.31	3.69	-1.38	0.0992	1
chr16:70872253-70873113	ENSG00000157423	HYDIN	protein_coding	HYDIN axonemal central pair apparatus protein [Source:HGNC Symbol;Acc:HGNC:19368]	GeneBody	862	-	-0.859485	-0.24	1.78	-2.02	0.0993	1
chr10:74853067-74853763	ENSG00000156650	KAT6B	protein_coding	lysine acetyltransferase 6B [Source:HGNC Symbol;Acc:HGNC:17582]	GeneBody	698	+	-0.11315	4.9	3.93	0.97	0.0993	1
chr19:50080890-50081821					Intergenic	933		-0.112583	3.75	2.37	1.38	0.0993	1
chr1:155357194-155357761	ENSG00000116539	ASH1L	protein_coding	ASH1 like histone lysine methyltransferase [Source:HGNC Symbol;Acc:HGNC:19088]	GeneBody	569	-	-0.0267857	3.76	2.5	1.26	0.0994	1
chr12:3645206-3646089	ENSG00000130038	CRACR2A	protein_coding	calcium release activated channel regulator 2A [Source:HGNC Symbol;Acc:HGNC:28657]	GeneBody	885	-	0.381733	3.65	4.56	-0.91	0.0994	1
chr8:20136396-20137041					Intergenic	647		0.104167	3.24	1.5	1.74	0.0995	1
chr3:129044968-129045879					Intergenic	913		-0.00858369	4.62	3.5	1.12	0.0996	1
chr3:171975099-171975623	ENSG00000287899	AC055714.1	lncRNA	novel transcript	GeneBody	526	+	0.355649	2.85	4.04	-1.19	0.0996	1
chr5:155730618-155731192					Intergenic	576		0.108844	2.72	3.99	-1.27	0.0997	1
chr7:36380851-36381861	ENSG00000164542	KIAA0895	protein_coding	KIAA0895 [Source:HGNC Symbol;Acc:HGNC:22206]	GeneBody	1012	-	0.321962	2.37	3.93	-1.56	0.0997	1
chr1:155020451-155021164	ENSG00000163354	DCST2	protein_coding	DC-STAMP domain containing 2 [Source:HGNC Symbol;Acc:HGNC:26562]	GeneBody,Terminator	715	-	-0.246459	3.87	2.45	1.41	0.0997	1
chr6:108966800-108967504	ENSG00000118690	ARMC2	protein_coding	armadillo repeat containing 2 [Source:HGNC Symbol;Acc:HGNC:23045]	GeneBody	706	+	0.0439276	3.14	4.19	-1.05	0.0997	1
chr16:34941647-34942562					Intergenic	917		0.79941	4.57	3.68	0.89	0.0998	1
chr11:3173856-3174719					Intergenic	865		-0.869919	3.59	4.57	-0.98	0.0999	1
chr2:96762850-96763704	ENSG00000158158	CNNM4	protein_coding	cyclin and CBS domain divalent metal cation transport mediator 4 [Source:HGNC Symbol;Acc:HGNC:105]	GeneBody	856	+	0.166667	2.97	4.14	-1.17	0.1	1
chrX:152851631-152852256	ENSG00000147383	NSDHL	protein_coding	NAD(P) dependent steroid dehydrogenase-like [Source:HGNC Symbol;Acc:HGNC:13398]	GeneBody	627	+	-0.264095	2.39	3.72	-1.33	0.1	1
chr11:1124400-1125785					Intergenic	1387		0.937598	2.44	3.77	-1.33	0.1	1
chr12:128164182-128165269					Intergenic	1089		-0.8591	3.32	4.54	-1.21	0.1	1
chr19:40777710-40778383	ENSG00000261857	MIA	protein_coding	MIA SH3 domain containing [Source:HGNC Symbol;Acc:HGNC:7076]	Promoter,GeneBody,Terminator	675	+	-0.0776471	3.07	4.31	-1.24	0.1	1
chr21:8243175-8249223					Intergenic	6050		-0.113856	-0.24	1.74	-1.98	0.1	1
chr20:51785455-51786413	ENSG00000101115	SALL4	protein_coding	spalt like transcription factor 4 [Source:HGNC Symbol;Acc:HGNC:15924]	GeneBody	960	-	-0.128	4.49	3.4	1.09	0.1	1
chr1:246802673-246803656					Intergenic	985		0.0882353	3.35	4.4	-1.05	0.1	1
chr19:42090305-42091314	ENSG00000028277	POU2F2	protein_coding	POU class 2 homeobox 2 [Source:HGNC Symbol;Acc:HGNC:9213]	GeneBody,Terminator	1011	-	0.164835	4.15	5.04	-0.89	0.1	1
chr7:75588863-75589404	ENSG00000127946	HIP1	protein_coding	huntingtin interacting protein 1 [Source:HGNC Symbol;Acc:HGNC:4913]	GeneBody	543	-	0.206751	2.05	3.74	-1.69	0.101	1
chr1:234264910-234265601	ENSG00000231272	AL122008.1	lncRNA	novel transcript	GeneBody	693	+	-0.327485	3.6	4.61	-1.01	0.101	1
chr5:17127402-17128261	ENSG00000215196	BASP1-AS1	lncRNA	BASP1 antisense RNA 1 [Source:HGNC Symbol;Acc:HGNC:26609]	Terminator	861	-	-0.207254	3.85	4.72	-0.86	0.101	1
chr19:900112-900616	ENSG00000198858	R3HDM4	protein_coding	R3H domain containing 4 [Source:HGNC Symbol;Acc:HGNC:28270]	GeneBody	506	-	-0.415385	2.35	3.73	-1.39	0.101	1
chr16:52673126-52673609					Intergenic	485		-0.241667	3.08	4.14	-1.06	0.101	1
chr12:112401150-112402125					Intergenic	977		0.0660793	4.46	3.39	1.07	0.101	1
chr19:35930417-35931192					Intergenic	777		0.247649	4.96	4.08	0.88	0.101	1
chr11:67700067-67700865					Intergenic	800		-0.321429	3.37	4.39	-1.02	0.101	1
chr3:129549044-129549765	ENSG00000178804	H1-8	protein_coding	H1.8 linker histone [Source:HGNC Symbol;Acc:HGNC:18463]	GeneBody	723	+	0.255708	1.81	3.66	-1.85	0.101	1
chrX:64846208-64847098					Intergenic	892		-0.411765	3.95	4.92	-0.96	0.101	1
chr2:232384713-232385630	ENSG00000163283	ALPP	protein_coding	alkaline phosphatase, placental [Source:HGNC Symbol;Acc:HGNC:439]	Terminator	919	+	0.260143	3.33	4.4	-1.06	0.101	1
chr8:133394620-133395232					Intergenic	614		0.116981	4.37	3.28	1.08	0.101	1
chr10:48527007-48527673	ENSG00000128805	ARHGAP22	protein_coding	Rho GTPase activating protein 22 [Source:HGNC Symbol;Acc:HGNC:30320]	GeneBody	668	-	0.611465	3.74	4.66	-0.92	0.101	1
chr19:55010633-55012186	ENSG00000267265	AC011476.3	lncRNA	novel transcript, antisense to RDH13 and GP6	GeneBody,Terminator	1555	+	0.368821	4.9	5.65	-0.75	0.101	1
chr6:39308855-39309648	ENSG00000124780	KCNK17	protein_coding	potassium two pore domain channel subfamily K member 17 [Source:HGNC Symbol;Acc:HGNC:14465]	GeneBody	795	-	0.0847458	3.96	2.65	1.3	0.101	1
chr1:92415248-92416572					Intergenic	1326		0.0420168	3.08	4.23	-1.15	0.101	1
chr5:113105926-113106609	ENSG00000171444	MCC	protein_coding	MCC regulator of WNT signaling pathway [Source:HGNC Symbol;Acc:HGNC:6935]	GeneBody	685	-	-0.515152	1.23	2.95	-1.73	0.101	1
chr1:54305474-54306274	ENSG00000157216	SSBP3	protein_coding	single stranded DNA binding protein 3 [Source:HGNC Symbol;Acc:HGNC:15674]	GeneBody	802	-	-0.118557	2.81	4.06	-1.25	0.101	1
chr3:196141771-196143394	ENSG00000224652	LINC00885	lncRNA	long intergenic non-protein coding RNA 885 [Source:HGNC Symbol;Acc:HGNC:48571]	Promoter	1625	+	0.0767544	4.08	5.15	-1.07	0.101	1
chr12:103904796-103906165					Intergenic	1371		0.562064	3.76	4.68	-0.92	0.101	1
chr5:160332175-160333453					Intergenic	1280		-0.286822	3.8	4.84	-1.04	0.101	1
chr22:27461919-27462994	ENSG00000227880	AL050402.1	lncRNA	novel transcript	Promoter	1077	-	0.219081	3.41	4.46	-1.05	0.102	1
chr17:659417-659954	ENSG00000141252	VPS53	protein_coding	VPS53 subunit of GARP complex [Source:HGNC Symbol;Acc:HGNC:25608]	GeneBody	539	-	-0.340996	1.81	3.45	-1.64	0.102	1
chr1:125174055-125183673					Intergenic	9620		-0.205347	3.3	1.36	1.94	0.102	1
chr2:48182878-48183632	ENSG00000230773	AC092650.1	lncRNA	novel transcript	GeneBody	756	-	-0.201166	1.63	3.47	-1.84	0.102	1
chr5:140143612-140144941					Intergenic	1331		-0.104137	4.81	3.88	0.93	0.102	1
chr5:157420597-157421391	ENSG00000285868	AC008676.3	protein_coding	Novel protein	GeneBody	796	-	-0.0128205	4.44	3.46	0.98	0.102	1
chr6:160850034-160850995					Intergenic	963		0.133172	3.42	4.4	-0.98	0.102	1
chr20:63545156-63545685	ENSG00000125508	SRMS	protein_coding	src-related kinase lacking C-terminal regulatory tyrosine and N-terminal myristylation sites [Source:HGNC Symbol;Acc:HGNC:11298]	GeneBody,Terminator	531	-	0.039039	2.44	3.89	-1.45	0.102	1
chr1:43557653-43558172	ENSG00000142949	PTPRF	protein_coding	protein tyrosine phosphatase receptor type F [Source:HGNC Symbol;Acc:HGNC:9670]	GeneBody	521	+	0.176101	2.57	3.86	-1.28	0.102	1
chr6:41752222-41752870					Intergenic	650		0.0538922	4.37	3.37	1	0.102	1
chr6:156975404-156975966	ENSG00000049618	ARID1B	protein_coding	AT-rich interaction domain 1B [Source:HGNC Symbol;Acc:HGNC:18040]	GeneBody	564	+	0.047619	3.57	2.04	1.53	0.102	1
chr13:98477404-98478236	ENSG00000102572	STK24	protein_coding	serine/threonine kinase 24 [Source:HGNC Symbol;Acc:HGNC:11403]	GeneBody	834	-	-0.056338	3.01	4.11	-1.09	0.102	1
chr19:9791336-9792265	ENSG00000266950	AC008752.2	lncRNA	novel transcript	Promoter	931	+	-0.517241	2.81	4.02	-1.2	0.102	1
chr12:56460147-56460828	ENSG00000285528	AC097104.1	protein_coding	novel protein	GeneBody	683	-	0.0489914	4.26	3.17	1.09	0.102	1
chr14:74200429-74200868	ENSG00000205659	LIN52	protein_coding	lin-52 DREAM MuvB core complex component [Source:HGNC Symbol;Acc:HGNC:19856]	Terminator	441	+	0.222222	4.68	3.69	0.99	0.102	1
chr12:30795020-30795475	ENSG00000235884	LINC00941	lncRNA	long intergenic non-protein coding RNA 941 [Source:HGNC Symbol;Acc:HGNC:48635]	Promoter,GeneBody	457	+	0.0316742	3.1	4.23	-1.13	0.102	1
chr16:22424824-22425208					Intergenic	386		-0.0103093	2.36	3.77	-1.41	0.102	1
chr16:69514509-69515229					Intergenic	722		-0.344928	2.89	4.16	-1.27	0.103	1
chr17:13838108-13838749					Intergenic	643		0.037037	3.86	2.61	1.24	0.103	1
chr21:35898617-35899030					Intergenic	415		-0.0232558	3.33	1.73	1.6	0.103	1
chr10:70271518-70272387	ENSG00000148734	NPFFR1	protein_coding	neuropeptide FF receptor 1 [Source:HGNC Symbol;Acc:HGNC:17425]	GeneBody	871	-	0.175573	5.01	4.2	0.81	0.103	1
chr6:14915151-14915988					Intergenic	839		-0.140187	3.57	2.03	1.54	0.103	1
chr19:36053305-36053736	ENSG00000075702	WDR62	protein_coding	WD repeat domain 62 [Source:HGNC Symbol;Acc:HGNC:24502]	Promoter	433	+	0.0645161	2.53	3.84	-1.3	0.103	1
chr19:48993531-48994198	ENSG00000104812	GYS1	protein_coding	glycogen synthase 1 [Source:HGNC Symbol;Acc:HGNC:4706]	Promoter	669	-	0.260982	1.88	3.5	-1.62	0.103	1
chr13:42871002-42872955					Intergenic	1955		0.358025	2.17	3.73	-1.56	0.103	1
chr7:48835304-48835901					Intergenic	599		0.102881	3.94	2.63	1.31	0.103	1
chr14:29108446-29109333	ENSG00000258028	AL135878.1	lncRNA	novel transcript	GeneBody	889	+	0.536145	5.83	5.12	0.7	0.103	1
chr3:123550152-123550774	ENSG00000206527	HACD2	protein_coding	3-hydroxyacyl-CoA dehydratase 2 [Source:HGNC Symbol;Acc:HGNC:9640]	GeneBody	624	-	0.321918	2.85	4.1	-1.25	0.103	1
chr16:2364123-2364838					Intergenic	717		0.333333	2.8	3.98	-1.18	0.103	1
chr22:41645301-41645791	ENSG00000196419	XRCC6	protein_coding	X-ray repair cross complementing 6 [Source:HGNC Symbol;Acc:HGNC:4055]	GeneBody	492	+	0	4.73	3.74	0.99	0.103	1
chr8:141073290-141073682					Intergenic	394		0.0790698	2.28	3.83	-1.55	0.103	1
chr16:26372936-26375509					Intergenic	2575		0.577489	4.52	5.41	-0.89	0.103	1
chr7:101739681-101740483					Intergenic	804		0.0204082	2.93	4.14	-1.21	0.103	1
chr19:35447611-35448808	ENSG00000126262	FFAR2	protein_coding	free fatty acid receptor 2 [Source:HGNC Symbol;Acc:HGNC:4501]	Promoter	1199	+	0.13253	3.86	4.78	-0.92	0.103	1
chr19:56301804-56303086	ENSG00000267710	EDDM13	protein_coding	epididymal protein 13 [Source:HGNC Symbol;Acc:HGNC:53168]	GeneBody	1284	+	-0.283237	5.2	5.86	-0.67	0.103	1
chr12:121940979-121941436	ENSG00000158023	WDR66	protein_coding	WD repeat domain 66 [Source:HGNC Symbol;Acc:HGNC:28506]	GeneBody	459	+	-0.0288462	3.16	4.24	-1.07	0.104	1
chr19:55121722-55122433	ENSG00000287170	AC010327.8	lncRNA	novel transcript, antisense to PPP1R12C	GeneBody,Terminator	713	+	-0.132597	4.77	3.79	0.98	0.104	1
chr8:94529008-94530129	ENSG00000164944	VIRMA	protein_coding	vir like m6A methyltransferase associated [Source:HGNC Symbol;Acc:HGNC:24500]	GeneBody	1123	-	-0.234409	4.61	3.65	0.96	0.104	1
chr3:34017864-34018464					Intergenic	602		-0.317406	2.04	3.52	-1.48	0.104	1
chr10:22763982-22764498					Intergenic	518		0.273408	3.96	2.64	1.32	0.104	1
chr5:138296109-138296917	ENSG00000158402	CDC25C	protein_coding	cell division cycle 25C [Source:HGNC Symbol;Acc:HGNC:1727]	GeneBody	810	-	-0.14433	4.23	3.11	1.11	0.104	1
chr12:6464081-6465085	ENSG00000139190	VAMP1	protein_coding	vesicle associated membrane protein 1 [Source:HGNC Symbol;Acc:HGNC:12642]	Promoter,GeneBody,Terminator	1006	-	-0.0131332	3.6	4.52	-0.91	0.104	1
chr14:55243143-55243595					Intergenic	454		0.0366972	2.36	3.8	-1.43	0.104	1
chrX:133549388-133550347	ENSG00000147257	GPC3	protein_coding	glypican 3 [Source:HGNC Symbol;Acc:HGNC:4451]	GeneBody	961	-	-0.467775	3.03	4.22	-1.19	0.104	1
chr7:75705325-75706493	ENSG00000127946	HIP1	protein_coding	huntingtin interacting protein 1 [Source:HGNC Symbol;Acc:HGNC:4913]	GeneBody	1170	-	-0.0834951	5.06	4.09	0.97	0.104	1
chr12:6722036-6722747	ENSG00000270068	AC125494.3	lncRNA	novel transcript, antisense to ZNF384	Promoter	713	+	0.0769231	4.61	3.6	1.01	0.104	1
chr7:73540839-73541708	ENSG00000106635	BCL7B	protein_coding	BAF chromatin remodeling complex subunit BCL7B [Source:HGNC Symbol;Acc:HGNC:1005]	GeneBody	871	-	-0.102804	4.84	3.87	0.97	0.104	1
chr9:135577813-135580160	ENSG00000237339	LINC01502	lncRNA	long intergenic non-protein coding RNA 1502 [Source:HGNC Symbol;Acc:HGNC:51183]	GeneBody	2349	+	-0.773979	4.01	5.01	-1	0.104	1
chr5:141082440-141083161	ENSG00000279558	AC244517.9	lncRNA	novel transcript	GeneBody	723	+	-0.0134228	4.34	3.31	1.04	0.104	1
chrX:65872633-65873261					Intergenic	630		-0.139706	4.47	5.25	-0.77	0.104	1
chr1:204366056-204367395	ENSG00000280924	LINC00628	lncRNA	long intergenic non-protein coding RNA 628 [Source:HGNC Symbol;Acc:HGNC:27008]	Terminator	1341	-	0.102339	4.91	3.95	0.96	0.104	1
chr7:74297813-74298521	ENSG00000106665	CLIP2	protein_coding	CAP-Gly domain containing linker protein 2 [Source:HGNC Symbol;Acc:HGNC:2586]	GeneBody	710	+	-0.0612245	4.49	3.5	0.99	0.105	1
chr20:39070022-39071163					Intergenic	1143		0.0522648	2.93	4.16	-1.23	0.105	1
chr8:140271651-140272698	ENSG00000167632	TRAPPC9	protein_coding	trafficking protein particle complex 9 [Source:HGNC Symbol;Acc:HGNC:30832]	GeneBody	1049	-	0.556818	3.63	4.76	-1.14	0.105	1
chr5:142082843-142083477					Intergenic	636		-0.122807	3.88	2.45	1.43	0.105	1
chr1:115849833-115850363					Intergenic	532		-0.0761421	4.82	3.96	0.86	0.105	1
chr1:7989997-7990875					Intergenic	880		-0.676724	3.32	4.49	-1.17	0.105	1
chr10:99182817-99183879	ENSG00000172987	HPSE2	protein_coding	heparanase 2 (inactive) [Source:HGNC Symbol;Acc:HGNC:18374]	GeneBody	1064	-	-0.0451613	2.52	3.87	-1.34	0.105	1
chr16:16138954-16140022	ENSG00000103222	ABCC1	protein_coding	ATP binding cassette subfamily C member 1 [Source:HGNC Symbol;Acc:HGNC:51]	GeneBody	1070	+	0.10775	3.84	2.47	1.37	0.105	1
chrX:63883411-63883954					Intergenic	545		-0.0516432	5.16	4.26	0.9	0.105	1
chr19:40731983-40732695	ENSG00000086544	ITPKC	protein_coding	inositol-trisphosphate 3-kinase C [Source:HGNC Symbol;Acc:HGNC:14897]	GeneBody	714	+	0.0481586	4.47	3.43	1.04	0.105	1
chr16:14425536-14426532					Intergenic	998		0.139918	4.66	3.65	1.01	0.105	1
chr19:13852965-13854184					Intergenic	1221		-0.0542373	3.85	4.8	-0.95	0.105	1
chr7:130820571-130821728					Intergenic	1159		-0.119675	4.52	3.46	1.06	0.105	1
chr3:50153236-50154281	ENSG00000235016	SEMA3F-AS1	lncRNA	SEMA3F antisense RNA 1 [Source:HGNC Symbol;Acc:HGNC:40518]	Promoter,GeneBody	1047	-	0.410935	4.42	5.17	-0.75	0.105	1
chr11:60951710-60952634	ENSG00000110446	SLC15A3	protein_coding	solute carrier family 15 member 3 [Source:HGNC Symbol;Acc:HGNC:18068]	Promoter	926	-	-0.387681	3.36	4.61	-1.25	0.105	1
chr1:52847027-52848859	ENSG00000203995	ZYG11A	protein_coding	zyg-11 family member A, cell cycle regulator [Source:HGNC Symbol;Acc:HGNC:32058]	GeneBody	1834	+	-0.00686499	5	3.81	1.19	0.106	1
chr3:158517348-158517789	ENSG00000174891	RSRC1	protein_coding	arginine and serine rich coiled-coil 1 [Source:HGNC Symbol;Acc:HGNC:24152]	GeneBody	443	+	-0.00636943	3.74	2.48	1.26	0.106	1
chr3:196314283-196315042	ENSG00000272741	AC069257.4	protein_coding	novel protein	GeneBody,Terminator	761	-	0.155556	4.41	3.4	1.01	0.106	1
chr16:74391548-74392230	ENSG00000196436	NPIPB15	protein_coding	nuclear pore complex interacting protein family member B15 [Source:HGNC Symbol;Acc:HGNC:34409]	Terminator	684	+	-0.073955	3.35	4.36	-1.01	0.106	1
chr22:15745677-15746174	ENSG00000225255	PSLNR	lncRNA	prostate enriched lncRNA [Source:HGNC Symbol;Acc:HGNC:54405]	Promoter	499	+	-0.49505	1.89	0.01	1.88	0.106	1
chr20:51633261-51634125	ENSG00000054793	ATP9A	protein_coding	ATPase phospholipid transporting 9A (putative) [Source:HGNC Symbol;Acc:HGNC:13540]	GeneBody	866	-	0.302564	3.47	4.45	-0.98	0.106	1
chr10:30744990-30745506					Intergenic	518		0.0126582	4.05	2.86	1.19	0.106	1
chr13:95343599-95344366					Intergenic	769		-0.0114286	0.89	2.81	-1.93	0.106	1
chr7:140405959-140407058	ENSG00000146955	RAB19	protein_coding	RAB19, member RAS oncogene family [Source:HGNC Symbol;Acc:HGNC:19982]	GeneBody	1101	+	0.0019802	4.51	3.47	1.04	0.106	1
chr18:57626346-57627195					Intergenic	851		0.0582278	2.89	4.02	-1.13	0.106	1
chr14:35971937-35972650	ENSG00000258342	AL133304.3	lncRNA	novel transcript, sense overlapping BRMS1L	GeneBody	715	+	-0.316872	3.38	1.64	1.74	0.106	1
chr7:73914865-73916001					Intergenic	1138		-0.333333	4.14	4.96	-0.82	0.106	1
chr2:42112002-42112507					Intergenic	507		-0.309804	1.87	3.51	-1.64	0.106	1
chr20:6713102-6715791					Intergenic	2691		0.235679	5.13	5.94	-0.81	0.106	1
chr10:103723935-103725278	ENSG00000107957	SH3PXD2A	protein_coding	SH3 and PX domains 2A [Source:HGNC Symbol;Acc:HGNC:23664]	GeneBody	1345	-	-0.121212	4.75	3.76	0.99	0.106	1
chr22:28809984-28810870					Intergenic	888		0.141304	5.13	4.22	0.91	0.106	1
chr1:53330162-53330734	ENSG00000225675	LINC01771	lncRNA	long intergenic non-protein coding RNA 1771 [Source:HGNC Symbol;Acc:HGNC:52561]	GeneBody	574	+	0.226481	3.37	4.33	-0.96	0.106	1
chr19:14583932-14592634	ENSG00000187912	CLEC17A	protein_coding	C-type lectin domain containing 17A [Source:HGNC Symbol;Acc:HGNC:34520]	Promoter,GeneBody	8704	+	-0.0140909	5.8	4.96	0.84	0.106	1
chr19:52048289-52049059	ENSG00000275055	AC011468.5	lncRNA	novel transcript, antisense to ZNF432	Promoter	772	+	-0.251701	3.69	4.72	-1.02	0.106	1
chr2:239565048-239566579					Intergenic	1533		0.611336	4.42	5.19	-0.77	0.106	1
chr1:183774373-183774948	ENSG00000143344	RGL1	protein_coding	ral guanine nucleotide dissociation stimulator like 1 [Source:HGNC Symbol;Acc:HGNC:30281]	GeneBody	577	+	-0.0866142	2.64	3.88	-1.24	0.106	1
chr2:217832726-217833567	ENSG00000079308	TNS1	protein_coding	tensin 1 [Source:HGNC Symbol;Acc:HGNC:11973]	GeneBody	843	-	-0.131818	3.26	4.43	-1.17	0.107	1
chr11:56941515-56943139					Intergenic	1626		-0.00472441	1.56	-0.42	1.97	0.107	1
chr18:721383-723094	ENSG00000176105	YES1	protein_coding	YES proto-oncogene 1, Src family tyrosine kinase [Source:HGNC Symbol;Acc:HGNC:12841]	GeneBody,Terminator	1713	-	-0.00777605	1.56	-0.42	1.97	0.107	1
chr1:115344070-115344801	ENSG00000228035	NGF-AS1	lncRNA	NGF antisense RNA 1 [Source:HGNC Symbol;Acc:HGNC:53922]	GeneBody	733	+	0.0791789	3.63	4.79	-1.16	0.107	1
chr3:110715524-110715936					Intergenic	414		-0.0419162	3.74	4.61	-0.87	0.107	1
chr17:1376245-1376937	ENSG00000108953	YWHAE	protein_coding	tyrosine 3-monooxygenase/tryptophan 5-monooxygenase activation protein epsilon [Source:HGNC Symbol;Acc:HGNC:12851]	GeneBody	694	-	-0.0972222	2.68	3.93	-1.24	0.107	1
chr5:157777557-157778649					Intergenic	1094		0.0355731	4.36	3.11	1.25	0.107	1
chr1:119459238-119459724					Intergenic	488		-0.0925926	3.21	4.29	-1.08	0.107	1
chr1:1594652-1596900	ENSG00000228594	FNDC10	protein_coding	fibronectin type III domain containing 10 [Source:HGNC Symbol;Acc:HGNC:42951]	Terminator	2250	-	0.440536	5.04	5.89	-0.85	0.107	1
chr4:40374577-40375145					Intergenic	570		0.131387	4.75	3.83	0.92	0.107	1
chr14:65036707-65037725	ENSG00000125954	CHURC1-FNTB	protein_coding	CHURC1-FNTB readthrough [Source:HGNC Symbol;Acc:HGNC:42960]	GeneBody	1020	+	-0.0585774	4.72	3.77	0.96	0.107	1
chr9:128118215-128118761	ENSG00000234771	SLC25A25-AS1	lncRNA	SLC25A25 antisense RNA 1 [Source:HGNC Symbol;Acc:HGNC:27844]	Promoter,Terminator	548	-	0.432177	2.28	3.69	-1.41	0.107	1
chr19:29420510-29421150	ENSG00000264515	AC011474.1	lncRNA	novel transcript	GeneBody	642	-	-0.734043	0.55	2.44	-1.9	0.107	1
chr13:33608773-33609319	ENSG00000234535	AL161719.1	lncRNA	novel transcript	Promoter	548	+	0.0695652	3.21	1.35	1.86	0.107	1
chr5:177498579-177499169	ENSG00000196923	PDLIM7	protein_coding	PDZ and LIM domain 7 [Source:HGNC Symbol;Acc:HGNC:22958]	Promoter,GeneBody	592	-	-0.173653	3.53	1.71	1.82	0.107	1
chr12:49272476-49273298	ENSG00000167553	TUBA1C	protein_coding	tubulin alpha 1c [Source:HGNC Symbol;Acc:HGNC:20768]	Promoter,Terminator	824	+	-0.00471698	3.31	4.31	-1	0.107	1
chr20:13453739-13454580	ENSG00000089123	TASP1	protein_coding	taspase 1 [Source:HGNC Symbol;Acc:HGNC:15859]	GeneBody	843	-	0.221932	3.4	4.43	-1.03	0.107	1
chr6:32932245-32932689	ENSG00000242574	HLA-DMB	protein_coding	major histocompatibility complex, class II, DM beta [Source:HGNC Symbol;Acc:HGNC:4935]	Terminator	446	-	-0.417476	2.14	3.69	-1.55	0.107	1
chr10:13363815-13365144					Intergenic	1331		-0.0214067	4.78	3.78	1	0.108	1
chr19:48735336-48736362	ENSG00000105538	RASIP1	protein_coding	Ras interacting protein 1 [Source:HGNC Symbol;Acc:HGNC:24716]	GeneBody	1028	-	-0.0174825	4.43	3.22	1.21	0.108	1
chr3:181902238-181903456					Intergenic	1220		-0.101124	4.54	3.59	0.95	0.108	1
chr5:14156521-14158061	ENSG00000038382	TRIO	protein_coding	trio Rho guanine nucleotide exchange factor [Source:HGNC Symbol;Acc:HGNC:12303]	GeneBody	1542	+	-0.15493	4.68	5.38	-0.71	0.108	1
chr19:46305537-46306361	ENSG00000124440	HIF3A	protein_coding	hypoxia inducible factor 3 subunit alpha [Source:HGNC Symbol;Acc:HGNC:15825]	GeneBody	826	+	0.298507	3.47	4.41	-0.94	0.108	1
chr7:57664827-57665630					Intergenic	805		0.0550725	2.11	3.61	-1.5	0.108	1
chr4:57556836-57563964					Intergenic	7130		0.0604375	1.92	0.01	1.91	0.108	1
chr8:81134286-81134701					Intergenic	417		0.153488	2.28	3.66	-1.38	0.108	1
chr19:31014500-31015039					Intergenic	541		0.940741	4.54	3.62	0.92	0.108	1
chr2:121197309-121197846					Intergenic	539		-0.0612245	2.81	4.15	-1.34	0.108	1
chr2:171904640-171905547					Intergenic	909		-0.125891	3.06	4.19	-1.13	0.108	1
chr1:150651506-150651988	ENSG00000143457	GOLPH3L	protein_coding	golgi phosphoprotein 3 like [Source:HGNC Symbol;Acc:HGNC:24882]	GeneBody	484	-	0.129032	4.4	3.49	0.91	0.108	1
chr7:3037751-3039569	ENSG00000198286	CARD11	protein_coding	caspase recruitment domain family member 11 [Source:HGNC Symbol;Acc:HGNC:16393]	GeneBody	1820	-	-0.0414847	5.1	4.09	1.01	0.108	1
chr9:129944040-129944612	ENSG00000187239	FNBP1	protein_coding	formin binding protein 1 [Source:HGNC Symbol;Acc:HGNC:17069]	GeneBody	574	-	0.0289855	4.01	2.94	1.07	0.108	1
chr3:42043087-42043668					Intergenic	583		-0.314286	3.22	4.32	-1.1	0.108	1
chr22:29795858-29796317	ENSG00000100325	ASCC2	protein_coding	activating signal cointegrator 1 complex subunit 2 [Source:HGNC Symbol;Acc:HGNC:24103]	GeneBody	461	-	-0.00900901	4.14	2.86	1.28	0.108	1
chr19:17633431-17634433	ENSG00000130477	UNC13A	protein_coding	unc-13 homolog A [Source:HGNC Symbol;Acc:HGNC:23150]	GeneBody	1004	-	-0.813333	3.73	4.64	-0.91	0.108	1
chr10:31658397-31659316					Intergenic	921		0.45679	3.17	4.27	-1.1	0.108	1
chr15:79058943-79059637	ENSG00000058335	RASGRF1	protein_coding	Ras protein specific guanine nucleotide releasing factor 1 [Source:HGNC Symbol;Acc:HGNC:9875]	GeneBody	696	-	-0.627397	2.96	4.06	-1.1	0.109	1
chr17:22712126-22712801					Intergenic	677		0.613793	3.2	4.21	-1.02	0.109	1
chr17:725320-725936					Intergenic	618		-0.0641026	3.14	4.19	-1.04	0.109	1
chr14:102518600-102519272					Intergenic	674		0.105413	3.7	4.63	-0.93	0.109	1
chr21:41954673-41955691	ENSG00000157617	C2CD2	protein_coding	C2 calcium dependent domain containing 2 [Source:HGNC Symbol;Acc:HGNC:1266]	Promoter	1020	-	0.55597	3.16	4.34	-1.18	0.109	1
chr1:22547055-22548319					Intergenic	1266		-0.764045	4.24	5.05	-0.81	0.109	1
chr10:38896595-38899322					Intergenic	2729		0.615745	4.79	5.83	-1.04	0.109	1
chr17:21943882-21944806					Intergenic	926		0.608696	2.81	4.28	-1.47	0.109	1
chr17:49266746-49267974					Intergenic	1230		0.136364	5.16	4.21	0.95	0.109	1
chr12:97479448-97480174	ENSG00000255794	RMST	lncRNA	rhabdomyosarcoma 2 associated transcript [Source:HGNC Symbol;Acc:HGNC:29893]	GeneBody	728	+	-0.335443	2.99	4.08	-1.09	0.109	1
chr1:205136679-205137320					Intergenic	643		0.0878378	4.03	2.91	1.12	0.109	1
chr21:7938183-7949231					Intergenic	11050		-0.704606	7.11	8.12	-1.01	0.109	1
chr7:47635768-47636135					Intergenic	369		0.60396	3.27	4.31	-1.04	0.109	1
chr1:228042101-228043083	ENSG00000154342	WNT3A	protein_coding	Wnt family member 3A [Source:HGNC Symbol;Acc:HGNC:15983]	GeneBody	984	+	0.585746	4.39	5.32	-0.93	0.109	1
chr6:87154827-87155729	ENSG00000272008	AL139274.2	lncRNA	novel transcript, antisense to ZNF292	Promoter	904	-	-0.0642857	3.12	4.41	-1.29	0.109	1
chr7:73656010-73657243					Intergenic	1235		0.0982456	5.02	3.98	1.03	0.109	1
chr16:23755724-23756706	ENSG00000166869	CHP2	protein_coding	calcineurin like EF-hand protein 2 [Source:HGNC Symbol;Acc:HGNC:24927]	Promoter,GeneBody	984	+	0.15342	1.91	3.54	-1.63	0.109	1
chr6:108923837-108924512	ENSG00000230290	ARMC2-AS1	lncRNA	ARMC2 antisense RNA 1 [Source:HGNC Symbol;Acc:HGNC:41008]	Promoter,GeneBody	677	-	0.0946746	3.01	4.09	-1.08	0.109	1
chr11:69481785-69482859	ENSG00000255774	LINC02747	lncRNA	long intergenic non-protein coding RNA 2747 [Source:HGNC Symbol;Acc:HGNC:54266]	Promoter	1076	-	0.466667	4.01	4.89	-0.88	0.11	1
chr2:233014577-233015808	ENSG00000222001	AC106876.1	lncRNA	novel transcript, antisense to NGEF	Promoter,GeneBody,Terminator	1233	+	-0.826498	3.81	4.8	-0.99	0.11	1
chrX:7153073-7153989					Intergenic	918		-0.759336	3.29	4.43	-1.14	0.11	1
chr2:132268946-132272172					Intergenic	3228		0.339731	5.82	6.54	-0.72	0.11	1
chr5:9352989-9353699	ENSG00000112902	SEMA5A	protein_coding	semaphorin 5A [Source:HGNC Symbol;Acc:HGNC:10736]	GeneBody	712	-	0.572414	4.6	3.74	0.86	0.11	1
chr16:56024218-56025996					Intergenic	1780		-0.699561	5.18	5.94	-0.75	0.11	1
chr1:5736933-5737653					Intergenic	722		0.693333	2.88	4.12	-1.24	0.11	1
chr17:20456525-20457096	ENSG00000170298	LGALS9B	protein_coding	galectin 9B [Source:HGNC Symbol;Acc:HGNC:24842]	GeneBody	573	-	0.00649351	-0.24	1.75	-1.99	0.11	1
chr9:84603772-84604756	ENSG00000285987	AL157886.1	lncRNA	Novel transcript, antisense to SLC28A3	GeneBody	986	+	-0.342342	4.94	4.13	0.8	0.11	1
chr1:121018338-121019038					Intergenic	702		-0.22293	2.01	0.02	1.99	0.11	1
chr3:45159807-45160189					Intergenic	384		-0.0740741	0.5	2.28	-1.78	0.11	1
chr2:90313229-90314224					Intergenic	997		0.200903	2.51	0.52	1.99	0.11	1
chr12:54482185-54483033	ENSG00000258137	AC079313.2	lncRNA	novel transcript, antisense to ZNF385A, GPR84, ITGA5 and GTSF1	GeneBody	850	+	0.166197	4.55	3.63	0.92	0.11	1
chr16:71818956-71820338					Intergenic	1384		0.157742	4.11	4.93	-0.82	0.11	1
chr11:61742313-61743357	ENSG00000134780	DAGLA	protein_coding	diacylglycerol lipase alpha [Source:HGNC Symbol;Acc:HGNC:1165]	GeneBody	1046	+	-0.0605565	2.87	4.06	-1.2	0.111	1
chr3:170049591-170050414	ENSG00000173890	GPR160	protein_coding	G protein-coupled receptor 160 [Source:HGNC Symbol;Acc:HGNC:23693]	GeneBody	825	+	-0.00934579	3.03	4.27	-1.25	0.111	1
chr19:55579314-55581160	ENSG00000218891	ZNF579	protein_coding	zinc finger protein 579 [Source:HGNC Symbol;Acc:HGNC:26646]	Promoter,GeneBody	1848	-	0.317395	5.92	6.61	-0.69	0.111	1
chrX:16181177-16181681					Intergenic	506		0.393939	0.39	2.38	-1.99	0.111	1
chr16:54290117-54291116	ENSG00000283689	AC018553.2	lncRNA	novel transcript, antisense to IRX3	Promoter,Terminator	1001	+	-0.180556	3.71	4.62	-0.91	0.111	1
chr1:225741698-225743085	ENSG00000227496	AC099066.2	lncRNA	novel transcript	GeneBody	1389	+	0.0911722	5.12	4.11	1.01	0.111	1
chr7:55683020-55684657					Intergenic	1639		0.217497	4.91	5.6	-0.69	0.111	1
chr5:79143588-79144189					Intergenic	603		-0.447811	1.65	3.32	-1.67	0.111	1
chr16:58640108-58640784					Intergenic	678		0.283489	2.84	4.01	-1.17	0.111	1
chr17:21862263-21863236					Intergenic	975		0.580902	3.27	4.38	-1.11	0.111	1
chr5:54533624-54534767					Intergenic	1145		0.231068	3.69	4.57	-0.87	0.111	1
chr8:143299908-143300437	ENSG00000185730	ZNF696	protein_coding	zinc finger protein 696 [Source:HGNC Symbol;Acc:HGNC:25872]	Terminator	531	+	0.126437	2.32	3.76	-1.43	0.111	1
chr10:2688749-2689320					Intergenic	573		-0.788321	2.74	3.88	-1.14	0.111	1
chr3:191670190-191671393					Intergenic	1205		0.413735	3.56	4.49	-0.93	0.111	1
chr1:115815779-115816667					Intergenic	890		-0.103093	4.42	5.16	-0.74	0.111	1
chrX:65598019-65598685					Intergenic	668		0.340351	5.42	4.6	0.83	0.111	1
chr7:139111754-139112518					Intergenic	766		0.431884	3.51	4.49	-0.98	0.111	1
chr17:44950755-44951745	ENSG00000267334	AC015936.1	lncRNA	novel transcript	Terminator	992	+	0.0977131	4.59	3.35	1.24	0.111	1
chr11:72020070-72021115	ENSG00000251143	AP002490.1	lncRNA	novel transcript	GeneBody,Terminator	1047	+	-0.155738	3.49	4.42	-0.93	0.111	1
chr5:43252362-43253096	ENSG00000177453	NIM1K	protein_coding	NIM1 serine/threonine protein kinase [Source:HGNC Symbol;Acc:HGNC:28646]	GeneBody	736	+	-0.0229508	3.49	4.4	-0.91	0.112	1
chr16:531974-533439	ENSG00000103326	CAPN15	protein_coding	calpain 15 [Source:HGNC Symbol;Acc:HGNC:11182]	GeneBody	1467	+	0.120406	4.82	3.64	1.19	0.112	1
chr12:48118995-48119556	ENSG00000152556	PFKM	protein_coding	phosphofructokinase, muscle [Source:HGNC Symbol;Acc:HGNC:8877]	GeneBody	563	+	0.234899	2.76	4.1	-1.34	0.112	1
chr9:129170013-129170513	ENSG00000268707	AL158151.4	lncRNA	novel transcript	Promoter	502	+	-0.0887097	1.64	3.13	-1.49	0.112	1
chr11:73249598-73250147					Intergenic	551		0.0545455	2.61	3.91	-1.3	0.112	1
chr19:10369406-10370928	ENSG00000105397	TYK2	protein_coding	tyrosine kinase 2 [Source:HGNC Symbol;Acc:HGNC:12440]	GeneBody	1524	-	0.030303	4.56	3.43	1.12	0.112	1
chr16:16188033-16188737	ENSG00000091262	ABCC6	protein_coding	ATP binding cassette subfamily C member 6 [Source:HGNC Symbol;Acc:HGNC:57]	GeneBody	706	-	-0.0212766	4.23	3.25	0.98	0.112	1
chr1:21356708-21357290					Intergenic	584		-0.158273	2.25	3.69	-1.44	0.112	1
chr21:8433884-8435660	ENSG00000281181	FP236383.5	lncRNA	novel transcript, similar to YY1 associated myogenesis RNA 1 YAM1	Terminator	1778	-	0.0368189	1.49	-0.42	1.91	0.112	1
chr17:21361839-21363367					Intergenic	1530		0.715994	4	5.02	-1.02	0.112	1
chr19:44489699-44490346	ENSG00000167384	ZNF180	protein_coding	zinc finger protein 180 [Source:HGNC Symbol;Acc:HGNC:12970]	GeneBody	649	-	0.569106	4.36	3.33	1.03	0.112	1
chr1:6307636-6308477	ENSG00000097021	ACOT7	protein_coding	acyl-CoA thioesterase 7 [Source:HGNC Symbol;Acc:HGNC:24157]	GeneBody	843	-	0.179798	2.26	3.56	-1.3	0.112	1
chr19:9944772-9945474					Intergenic	704		0.233645	3.23	4.26	-1.03	0.112	1
chr8:141347417-141348548					Intergenic	1133		-0.600832	3.7	4.66	-0.96	0.112	1
chr14:70181981-70182988	ENSG00000100678	SLC8A3	protein_coding	solute carrier family 8 member A3 [Source:HGNC Symbol;Acc:HGNC:11070]	GeneBody	1009	-	0.468468	3.13	4.38	-1.25	0.112	1
chr22:38547385-38548566	ENSG00000100206	DMC1	protein_coding	DNA meiotic recombinase 1 [Source:HGNC Symbol;Acc:HGNC:2927]	GeneBody	1183	-	-0.104587	4.16	4.97	-0.81	0.112	1
chr3:9872516-9873442	ENSG00000187288	CIDEC	protein_coding	cell death inducing DFFA like effector c [Source:HGNC Symbol;Acc:HGNC:24229]	GeneBody	928	-	0.11054	4.56	3.48	1.08	0.112	1
chr2:44950765-44951463					Intergenic	700		0.142105	2.54	3.87	-1.33	0.112	1
chr1:154746238-154747035	ENSG00000143603	KCNN3	protein_coding	potassium calcium-activated channel subfamily N member 3 [Source:HGNC Symbol;Acc:HGNC:6292]	GeneBody	799	-	-0.0697674	3.37	4.4	-1.03	0.112	1
chr1:43248768-43249603	ENSG00000243710	CFAP57	protein_coding	cilia and flagella associated protein 57 [Source:HGNC Symbol;Acc:HGNC:26485]	GeneBody	837	+	-0.184136	4.48	3.34	1.14	0.112	1
chr11:71134875-71136042					Intergenic	1169		-0.0786517	3.49	4.55	-1.06	0.112	1
chr3:9717682-9718313	ENSG00000144550	CPNE9	protein_coding	copine family member 9 [Source:HGNC Symbol;Acc:HGNC:24336]	GeneBody	633	+	0.289902	3.06	4.17	-1.11	0.112	1
chr6:73380861-73381545	ENSG00000231332	OOEP-AS1	lncRNA	OOEP antisense RNA 1 [Source:HGNC Symbol;Acc:HGNC:39192]	GeneBody	686	+	0.190635	3.13	4.17	-1.04	0.113	1
chr19:41881406-41882723	ENSG00000105369	CD79A	protein_coding	CD79a molecule [Source:HGNC Symbol;Acc:HGNC:1698]	Promoter,Terminator	1319	+	0.0819209	4.18	5.05	-0.87	0.113	1
chr16:57888040-57889066	ENSG00000070729	CNGB1	protein_coding	cyclic nucleotide gated channel subunit beta 1 [Source:HGNC Symbol;Acc:HGNC:2151]	GeneBody	1028	-	-0.106719	3.46	4.47	-1.01	0.113	1
chr13:32893721-32894337	ENSG00000226968	LINC00423	lncRNA	long intergenic non-protein coding RNA 423 [Source:HGNC Symbol;Acc:HGNC:42758]	GeneBody	618	-	-0.264214	3.51	4.45	-0.95	0.113	1
chr19:37589886-37590679	ENSG00000180479	ZNF571	protein_coding	zinc finger protein 571 [Source:HGNC Symbol;Acc:HGNC:25000]	GeneBody	795	-	0.141935	3.85	2.56	1.29	0.113	1
chr19:52856357-52857466	ENSG00000204604	ZNF468	protein_coding	zinc finger protein 468 [Source:HGNC Symbol;Acc:HGNC:33105]	Promoter,GeneBody	1111	-	-0.156146	2.69	3.89	-1.2	0.113	1
chr3:138913820-138914908					Intergenic	1090		0.0348624	4.95	4.03	0.92	0.113	1
chr20:31175435-31177908					Intergenic	2475		0.580042	4.25	5.25	-1	0.113	1
chr14:65173738-65174578					Intergenic	842		0.404467	3.71	4.67	-0.96	0.113	1
chr20:772135-772881					Intergenic	748		0.134078	3.85	4.79	-0.94	0.113	1
chr1:158205852-158207252	ENSG00000176320	AL138899.1	lncRNA	novel transcript	Promoter	1402	-	-0.0706714	4.41	3.34	1.07	0.113	1
chr19:49932421-49933877	ENSG00000169136	ATF5	protein_coding	activating transcription factor 5 [Source:HGNC Symbol;Acc:HGNC:790]	GeneBody,Terminator	1458	+	-0.0553592	4.35	5.17	-0.82	0.113	1
chr10:16851694-16852613	ENSG00000107611	CUBN	protein_coding	cubilin [Source:HGNC Symbol;Acc:HGNC:2548]	GeneBody	921	-	-0.893443	2.14	3.6	-1.47	0.113	1
chr11:46230626-46231551					Intergenic	927		0.0166271	4.46	3.47	0.98	0.113	1
chr19:53985321-53986416	ENSG00000142408	CACNG8	protein_coding	calcium voltage-gated channel auxiliary subunit gamma 8 [Source:HGNC Symbol;Acc:HGNC:13628]	GeneBody	1097	+	0.306569	5.1	5.77	-0.67	0.113	1
chr17:48856602-48857495	ENSG00000136436	CALCOCO2	protein_coding	calcium binding and coiled-coil domain 2 [Source:HGNC Symbol;Acc:HGNC:29912]	GeneBody	895	+	-0.125296	4.36	3.3	1.07	0.113	1
chr7:73356932-73357524	ENSG00000077800	FKBP6	protein_coding	FKBP prolyl isomerase 6 [Source:HGNC Symbol;Acc:HGNC:3722]	GeneBody	594	+	-0.0492958	4.11	3.07	1.05	0.113	1
chr19:50575974-50577225					Intergenic	1253		0.0234234	4.97	4.15	0.82	0.113	1
chr19:56966640-56967715					Intergenic	1077		-0.214765	4.55	5.32	-0.77	0.113	1
chr19:46212350-46213043					Intergenic	695		-0.15493	1.67	3.35	-1.68	0.113	1
chr20:35875150-35875708	ENSG00000025293	PHF20	protein_coding	PHD finger protein 20 [Source:HGNC Symbol;Acc:HGNC:16098]	GeneBody	560	+	0.0150376	3.09	4.13	-1.04	0.113	1
chr18:46093174-46094230	ENSG00000152234	ATP5F1A	protein_coding	ATP synthase F1 subunit alpha [Source:HGNC Symbol;Acc:HGNC:823]	GeneBody	1058	-	0.0212766	4.75	3.76	0.99	0.113	1
chr2:121835681-121836550					Intergenic	871		0.116822	3.97	2.72	1.25	0.113	1
chr17:9517855-9518940	ENSG00000170310	STX8	protein_coding	syntaxin 8 [Source:HGNC Symbol;Acc:HGNC:11443]	GeneBody	1087	-	-0.152542	3.34	4.33	-0.99	0.113	1
chr3:142361749-142362756	ENSG00000114127	XRN1	protein_coding	5'-3' exoribonuclease 1 [Source:HGNC Symbol;Acc:HGNC:30654]	GeneBody	1009	-	-0.213333	4.65	3.63	1.02	0.113	1
chr2:27360086-27360700	ENSG00000234072	AC074117.1	lncRNA	novel transcript, antisense to GTF3C2 and EIF2B4	Terminator	616	+	-0.0827068	4.2	3.15	1.06	0.113	1
chr10:44904346-44905098	ENSG00000234504	AL353801.2	lncRNA	novel transcript	GeneBody	754	-	0.403315	3.77	4.7	-0.93	0.114	1
chr8:34241721-34242870	ENSG00000254033	AC087855.1	lncRNA	novel transcript	GeneBody	1151	-	0.764486	3.5	4.6	-1.11	0.114	1
chr12:12938256-12939102	ENSG00000111291	GPRC5D	protein_coding	G protein-coupled receptor class C group 5 member D [Source:HGNC Symbol;Acc:HGNC:13310]	Terminator	848	-	0.147208	4.85	3.96	0.89	0.114	1
chr20:17657159-17658102	ENSG00000125844	RRBP1	protein_coding	ribosome binding protein 1 [Source:HGNC Symbol;Acc:HGNC:10448]	GeneBody	945	-	0.0365297	4.49	3.49	1	0.114	1
chr12:53549600-53550849	ENSG00000267281	ATF7-NPFF	protein_coding	ATF7-NPFF readthrough [Source:NCBI gene;Acc:114108587]	GeneBody	1251	-	0.14082	4.76	3.85	0.91	0.114	1
chr14:24097402-24098206	ENSG00000129535	NRL	protein_coding	neural retina leucine zipper [Source:HGNC Symbol;Acc:HGNC:8002]	GeneBody	806	-	0.0255102	4.3	3.15	1.15	0.114	1
chr7:60981307-60982338					Intergenic	1033		0.583113	5.11	4.32	0.78	0.114	1
chr3:176791003-176791616					Intergenic	615		0.270833	2.88	3.99	-1.11	0.114	1
chr12:20763820-20764583					Intergenic	765		-0.562982	2.05	3.49	-1.44	0.114	1
chr22:43385979-43386682					Intergenic	705		-0.43131	3.1	4.23	-1.14	0.114	1
chr12:32253776-32254383	ENSG00000151746	BICD1	protein_coding	BICD cargo adaptor 1 [Source:HGNC Symbol;Acc:HGNC:1049]	GeneBody	609	+	-0.588235	1.51	3.33	-1.82	0.114	1
chr12:129628609-129629581	ENSG00000151952	TMEM132D	protein_coding	transmembrane protein 132D [Source:HGNC Symbol;Acc:HGNC:29411]	GeneBody	974	-	-0.429806	3.39	4.4	-1.01	0.114	1
chr19:52094116-52095822	ENSG00000197608	ZNF841	protein_coding	zinc finger protein 841 [Source:HGNC Symbol;Acc:HGNC:27611]	Promoter	1708	-	-0.121839	5.38	6.11	-0.73	0.114	1
chr17:19396438-19398031					Intergenic	1595		-0.0263523	5.09	4.28	0.82	0.114	1
chr10:95336781-95337608	ENSG00000095637	SORBS1	protein_coding	sorbin and SH3 domain containing 1 [Source:HGNC Symbol;Acc:HGNC:14565]	GeneBody	829	-	0.339246	2.58	4.02	-1.44	0.114	1
chr6:150812609-150813765	ENSG00000120278	PLEKHG1	protein_coding	pleckstrin homology and RhoGEF domain containing G1 [Source:HGNC Symbol;Acc:HGNC:20884]	GeneBody	1158	+	0.294509	3.94	4.76	-0.83	0.114	1
chr17:37338290-37339001	ENSG00000278540	ACACA	protein_coding	acetyl-CoA carboxylase alpha [Source:HGNC Symbol;Acc:HGNC:84]	GeneBody	713	-	0.0598291	2.95	4.05	-1.1	0.114	1
[truncated: 34,698 more rows]
